# Supplementary material
Source: MDPI journal article supplement (https://www.mdpi.com/2039-7283/13/4/82)
Supplement: s1 [file s1]

|                                     |              |            |            |          |            |          |  |  |  |
|-------------------------------------|--------------|------------|------------|----------|------------|----------|--|--|--|
| <b>T0.- GRUPO</b>                   |              |            |            |          |            |          |  |  |  |
|                                     | <b>N</b>     | <b>%</b>   |            |          |            |          |  |  |  |
| <b>Total</b>                        | 80           | 100,0 %    |            |          |            |          |  |  |  |
| <b>PEC</b>                          | 40           | 50,0 %     |            |          |            |          |  |  |  |
| <b>POT</b>                          | 40           | 50,0 %     |            |          |            |          |  |  |  |
|                                     |              |            |            |          |            |          |  |  |  |
| <b>T1.- SEXO según GRUPO</b>        |              |            |            |          |            |          |  |  |  |
|                                     | <b>GRUPO</b> |            |            |          |            |          |  |  |  |
|                                     | <b>Total</b> |            | <b>PEC</b> |          | <b>POT</b> |          |  |  |  |
|                                     | <b>N</b>     | <b>%</b>   | <b>N</b>   | <b>%</b> | <b>N</b>   | <b>%</b> |  |  |  |
| <b>Total</b>                        | 80           | 100,0 %    | 40         | 100,0 %  | 40         | 100,0 %  |  |  |  |
| <b>Hombre</b>                       | 40           | 50,0 %     | 20         | 50,0 %   | 20         | 50,0 %   |  |  |  |
| <b>Mujer</b>                        | 40           | 50,0 %     | 20         | 50,0 %   | 20         | 50,0 %   |  |  |  |
|                                     |              |            |            |          |            |          |  |  |  |
| <b>T2.- EDAD (años) según GRUPO</b> |              |            |            |          |            |          |  |  |  |
|                                     | <b>GRUPO</b> |            |            |          |            |          |  |  |  |
|                                     | <b>Total</b> | <b>PEC</b> | <b>POT</b> |          |            |          |  |  |  |
| <b>N</b>                            | 80           | 40         | 40         |          |            |          |  |  |  |
| <b>Media</b>                        | 50,7         | 50,8       | 50,6       |          |            |          |  |  |  |
| <b>Desviación típica</b>            | 15,2         | 15,4       | 15,2       |          |            |          |  |  |  |
| <b>Mínimo</b>                       | 19,0         | 19,0       | 21,0       |          |            |          |  |  |  |
| <b>Máximo</b>                       | 81,0         | 81,0       | 80,0       |          |            |          |  |  |  |
| <b>Percentil 25</b>                 | 40,5         | 41,5       | 40,0       |          |            |          |  |  |  |
| <b>Mediana</b>                      | 49,5         | 49,0       | 52,0       |          |            |          |  |  |  |
| <b>Percentil 75</b>                 | 62,5         | 63,0       | 60,5       |          |            |          |  |  |  |
|                                     |              |            |            |          |            |          |  |  |  |
| <b>T3.- DIENTE según GRUPO</b>      |              |            |            |          |            |          |  |  |  |
|                                     | <b>GRUPO</b> |            |            |          |            |          |  |  |  |
|                                     | <b>Total</b> |            | <b>PEC</b> |          | <b>POT</b> |          |  |  |  |
|                                     | <b>N</b>     | <b>%</b>   | <b>N</b>   | <b>%</b> | <b>N</b>   | <b>%</b> |  |  |  |
| <b>Total</b>                        | 80           | 100,0 %    | 40         | 100,0 %  | 40         | 100,0 %  |  |  |  |

|                                     |              |          |            |          |            |          |  |  |  |
|-------------------------------------|--------------|----------|------------|----------|------------|----------|--|--|--|
| 12                                  | 1            | 1,3 %    | 0          | 0,0 %    | 1          | 2,5 %    |  |  |  |
| 14                                  | 2            | 2,5 %    | 2          | 5,0 %    | 0          | 0,0 %    |  |  |  |
| 15                                  | 4            | 5,0 %    | 0          | 0,0 %    | 4          | 10,0 %   |  |  |  |
| 16                                  | 2            | 2,5 %    | 1          | 2,5 %    | 1          | 2,5 %    |  |  |  |
| 17                                  | 4            | 5,0 %    | 2          | 5,0 %    | 2          | 5,0 %    |  |  |  |
| 18                                  | 1            | 1,3 %    | 1          | 2,5 %    | 0          | 0,0 %    |  |  |  |
| 24                                  | 3            | 3,8 %    | 0          | 0,0 %    | 3          | 7,5 %    |  |  |  |
| 25                                  | 5            | 6,3 %    | 5          | 12,5 %   | 0          | 0,0 %    |  |  |  |
| 26                                  | 6            | 7,5 %    | 2          | 5,0 %    | 4          | 10,0 %   |  |  |  |
| 27                                  | 13           | 16,3 %   | 8          | 20,0 %   | 5          | 12,5 %   |  |  |  |
| 33                                  | 1            | 1,3 %    | 0          | 0,0 %    | 1          | 2,5 %    |  |  |  |
| 34                                  | 1            | 1,3 %    | 1          | 2,5 %    | 0          | 0,0 %    |  |  |  |
| 35                                  | 3            | 3,8 %    | 1          | 2,5 %    | 2          | 5,0 %    |  |  |  |
| 36                                  | 2            | 2,5 %    | 1          | 2,5 %    | 1          | 2,5 %    |  |  |  |
| 37                                  | 8            | 10,0 %   | 6          | 15,0 %   | 2          | 5,0 %    |  |  |  |
| 38                                  | 1            | 1,3 %    | 0          | 0,0 %    | 1          | 2,5 %    |  |  |  |
| 44                                  | 2            | 2,5 %    | 1          | 2,5 %    | 1          | 2,5 %    |  |  |  |
| 45                                  | 5            | 6,3 %    | 2          | 5,0 %    | 3          | 7,5 %    |  |  |  |
| 46                                  | 8            | 10,0 %   | 5          | 12,5 %   | 3          | 7,5 %    |  |  |  |
| 47                                  | 6            | 7,5 %    | 1          | 2,5 %    | 5          | 12,5 %   |  |  |  |
| 48                                  | 2            | 2,5 %    | 1          | 2,5 %    | 1          | 2,5 %    |  |  |  |
|                                     |              |          |            |          |            |          |  |  |  |
| <b>T4.- TIPO DIENTE según GRUPO</b> |              |          |            |          |            |          |  |  |  |
|                                     | <b>GRUPO</b> |          |            |          |            |          |  |  |  |
|                                     | <b>Total</b> |          | <b>PEC</b> |          | <b>POT</b> |          |  |  |  |
|                                     | <b>N</b>     | <b>%</b> | <b>N</b>   | <b>%</b> | <b>N</b>   | <b>%</b> |  |  |  |
| <b>Total</b>                        | 80           | 100,0 %  | 40         | 100,0 %  | 40         | 100,0 %  |  |  |  |
| <b>Incisivos</b>                    | 1            | 1,3 %    | 0          | 0,0 %    | 1          | 2,5 %    |  |  |  |
| <b>Caninos</b>                      | 1            | 1,3 %    | 0          | 0,0 %    | 1          | 2,5 %    |  |  |  |
| <b>Premolares</b>                   | 25           | 31,3 %   | 12         | 30,0 %   | 13         | 32,5 %   |  |  |  |
| <b>Molares</b>                      | 53           | 66,3 %   | 28         | 70,0 %   | 25         | 62,5 %   |  |  |  |
|                                     |              |          |            |          |            |          |  |  |  |

|                                        |              |          |            |          |            |          |  |  |  |
|----------------------------------------|--------------|----------|------------|----------|------------|----------|--|--|--|
| <b>T5.- ARCADA según GRUPO</b>         |              |          |            |          |            |          |  |  |  |
|                                        | <b>GRUPO</b> |          |            |          |            |          |  |  |  |
|                                        | <b>Total</b> |          | <b>PEC</b> |          | <b>POT</b> |          |  |  |  |
|                                        | <b>N</b>     | <b>%</b> | <b>N</b>   | <b>%</b> | <b>N</b>   | <b>%</b> |  |  |  |
| <b>Total</b>                           | 80           | 100,0 %  | 40         | 100,0 %  | 40         | 100,0 %  |  |  |  |
| <b>Maxilar</b>                         | 41           | 51,2 %   | 21         | 52,5 %   | 20         | 50,0 %   |  |  |  |
| <b>Mandibular</b>                      | 39           | 48,8 %   | 19         | 47,5 %   | 20         | 50,0 %   |  |  |  |
|                                        |              |          |            |          |            |          |  |  |  |
| <b>T6.- CAUSA PULPITIS según GRUPO</b> |              |          |            |          |            |          |  |  |  |
|                                        | <b>GRUPO</b> |          |            |          |            |          |  |  |  |
|                                        | <b>Total</b> |          | <b>PEC</b> |          | <b>POT</b> |          |  |  |  |
|                                        | <b>N</b>     | <b>%</b> | <b>N</b>   | <b>%</b> | <b>N</b>   | <b>%</b> |  |  |  |
| <b>Total</b>                           | 80           | 100,0 %  | 40         | 100,0 %  | 40         | 100,0 %  |  |  |  |
| <b>Caries</b>                          | 40           | 50,0 %   | 19         | 47,5 %   | 21         | 52,5 %   |  |  |  |
| <b>Obturación</b>                      | 23           | 28,7 %   | 13         | 32,5 %   | 10         | 25,0 %   |  |  |  |
| <b>Periodontal</b>                     | 3            | 3,8 %    | 1          | 2,5 %    | 2          | 5,0 %    |  |  |  |
| <b>Fisura</b>                          | 6            | 7,5 %    | 5          | 12,5 %   | 1          | 2,5 %    |  |  |  |
| <b>Fractura cuspídea</b>               | 2            | 2,5 %    | 1          | 2,5 %    | 1          | 2,5 %    |  |  |  |
| <b>Desgaste cervical</b>               | 3            | 3,8 %    | 1          | 2,5 %    | 2          | 5,0 %    |  |  |  |
| <b>TAL</b>                             | 3            | 3,8 %    | 0          | 0,0 %    | 3          | 7,5 %    |  |  |  |
|                                        |              |          |            |          |            |          |  |  |  |
| <b>T7.- PAA según GRUPO</b>            |              |          |            |          |            |          |  |  |  |
|                                        | <b>GRUPO</b> |          |            |          |            |          |  |  |  |
|                                        | <b>Total</b> |          | <b>PEC</b> |          | <b>POT</b> |          |  |  |  |
|                                        | <b>N</b>     | <b>%</b> | <b>N</b>   | <b>%</b> | <b>N</b>   | <b>%</b> |  |  |  |
| <b>Total</b>                           | 80           | 100,0 %  | 40         | 100,0 %  | 40         | 100,0 %  |  |  |  |
| <b>No</b>                              | 47           | 58,8 %   | 20         | 50,0 %   | 27         | 67,5 %   |  |  |  |
| <b>Sí</b>                              | 33           | 41,3 %   | 20         | 50,0 %   | 13         | 32,5 %   |  |  |  |
|                                        |              |          |            |          |            |          |  |  |  |
| <b>T8.- AINES PRE según GRUPO</b>      |              |          |            |          |            |          |  |  |  |
|                                        | <b>GRUPO</b> |          |            |          |            |          |  |  |  |

|                                            | Total |         | PEC |         | POT |         |  |  |  |
|--------------------------------------------|-------|---------|-----|---------|-----|---------|--|--|--|
|                                            | N     | %       | N   | %       | N   | %       |  |  |  |
| Total                                      | 80    | 100,0 % | 40  | 100,0 % | 40  | 100,0 % |  |  |  |
| No                                         | 43    | 53,8 %  | 23  | 57,5 %  | 20  | 50,0 %  |  |  |  |
| Sí                                         | 37    | 46,3 %  | 17  | 42,5 %  | 20  | 50,0 %  |  |  |  |
|                                            |       |         |     |         |     |         |  |  |  |
| <b>T9.- EXPERIENCIA PREVIA según GRUPO</b> |       |         |     |         |     |         |  |  |  |
|                                            | GRUPO |         |     |         |     |         |  |  |  |
|                                            | Total |         | PEC |         | POT |         |  |  |  |
|                                            | N     | %       | N   | %       | N   | %       |  |  |  |
| Total                                      | 80    | 100,0 % | 40  | 100,0 % | 40  | 100,0 % |  |  |  |
| No                                         | 23    | 28,7 %  | 14  | 35,0 %  | 9   | 22,5 %  |  |  |  |
| Sí                                         | 50    | 62,5 %  | 24  | 60,0 %  | 26  | 65,0 %  |  |  |  |
| NS                                         | 7     | 8,8 %   | 2   | 5,0 %   | 5   | 12,5 %  |  |  |  |
|                                            |       |         |     |         |     |         |  |  |  |
| <b>T10.- PRIMERA VISITA según GRUPO</b>    |       |         |     |         |     |         |  |  |  |
|                                            | GRUPO |         |     |         |     |         |  |  |  |
|                                            | Total |         | PEC |         | POT |         |  |  |  |
|                                            | N     | %       | N   | %       | N   | %       |  |  |  |
| Total                                      | 80    | 100,0 % | 40  | 100,0 % | 40  | 100,0 % |  |  |  |
| No                                         | 57    | 71,3 %  | 31  | 77,5 %  | 26  | 65,0 %  |  |  |  |
| Sí                                         | 23    | 28,7 %  | 9   | 22,5 %  | 14  | 35,0 %  |  |  |  |
|                                            |       |         |     |         |     |         |  |  |  |
| <b>T11.- ANESTESIA según GRUPO</b>         |       |         |     |         |     |         |  |  |  |
|                                            | GRUPO |         |     |         |     |         |  |  |  |
|                                            | Total |         | PEC |         | POT |         |  |  |  |
|                                            | N     | %       | N   | %       | N   | %       |  |  |  |
| Total                                      | 80    | 100,0 % | 40  | 100,0 % | 40  | 100,0 % |  |  |  |
| Infiltrativa                               | 45    | 56,3 %  | 23  | 57,5 %  | 22  | 55,0 %  |  |  |  |
| Troncular                                  | 35    | 43,8 %  | 17  | 42,5 %  | 18  | 45,0 %  |  |  |  |
|                                            |       |         |     |         |     |         |  |  |  |

| T12.- ANESTESIA COMPLEMENTARIA según GRUPO |                       |         |         |         |         |         |         |  |  |
|--------------------------------------------|-----------------------|---------|---------|---------|---------|---------|---------|--|--|
|                                            | GRUPO                 |         |         |         |         |         |         |  |  |
|                                            | Total                 |         | PEC     |         | POT     |         |         |  |  |
|                                            | N                     | %       | N       | %       | N       | %       |         |  |  |
| INTRALIGAMENTOS A                          | Total                 | 80      | 100,0 % | 40      | 100,0 % | 40      | 100,0 % |  |  |
|                                            | No                    | 43      | 53,8 %  | 23      | 57,5 %  | 20      | 50,0 %  |  |  |
|                                            | Sí                    | 37      | 46,3 %  | 17      | 42,5 %  | 20      | 50,0 %  |  |  |
| INTRAPULPAR                                | Total                 | 80      | 100,0 % | 40      | 100,0 % | 40      | 100,0 % |  |  |
|                                            | No                    | 55      | 68,8 %  | 27      | 67,5 %  | 28      | 70,0 %  |  |  |
|                                            | Sí                    | 25      | 31,3 %  | 13      | 32,5 %  | 12      | 30,0 %  |  |  |
| ANESTESIA COMPLEMENTARIA                   | Total                 | 80      | 100,0 % | 40      | 100,0 % | 40      | 100,0 % |  |  |
|                                            | No                    | 32      | 40,0 %  | 16      | 40,0 %  | 16      | 40,0 %  |  |  |
|                                            | Sólo intraligamentosa | 23      | 28,7 %  | 11      | 27,5 %  | 12      | 30,0 %  |  |  |
|                                            | Sólo intrapulpar      | 11      | 13,8 %  | 7       | 17,5 %  | 4       | 10,0 %  |  |  |
|                                            | Ambas                 | 14      | 17,5 %  | 6       | 15,0 %  | 8       | 20,0 %  |  |  |
|                                            |                       |         |         |         |         |         |         |  |  |
| T13.- RX CONDUCTOMETRIA según GRUPO        |                       |         |         |         |         |         |         |  |  |
|                                            | GRUPO                 |         |         |         |         |         |         |  |  |
|                                            | Total                 |         | PEC     |         | POT     |         |         |  |  |
|                                            | N                     | %       | N       | %       | N       | %       |         |  |  |
| Total                                      | 80                    | 100,0 % | 40      | 100,0 % | 40      | 100,0 % |         |  |  |
| No                                         | 80                    | 100,0 % | 40      | 100,0 % | 40      | 100,0 % |         |  |  |
|                                            |                       |         |         |         |         |         |         |  |  |
| T14.- SANGRADO PROFUSO según GRUPO         |                       |         |         |         |         |         |         |  |  |
|                                            | GRUPO                 |         |         |         |         |         |         |  |  |
|                                            | Total                 |         | PEC     |         | POT     |         |         |  |  |
|                                            | N                     | %       | N       | %       | N       | %       |         |  |  |
| Total                                      | 80                    | 100,0 % | 40      | 100,0 % | 40      | 100,0 % |         |  |  |
| No                                         | 51                    | 63,7 %  | 24      | 60,0 %  | 27      | 67,5 %  |         |  |  |
| Sí                                         | 29                    | 36,3 %  | 16      | 40,0 %  | 13      | 32,5 %  |         |  |  |

|                                                  |              |          |            |          |            |          |  |  |  |
|--------------------------------------------------|--------------|----------|------------|----------|------------|----------|--|--|--|
|                                                  |              |          |            |          |            |          |  |  |  |
| <b>T15.- SANGRADO CONDUCTO según GRUPO</b>       |              |          |            |          |            |          |  |  |  |
|                                                  | <b>GRUPO</b> |          |            |          |            |          |  |  |  |
|                                                  | <b>Total</b> |          | <b>PEC</b> |          | <b>POT</b> |          |  |  |  |
|                                                  | <b>N</b>     | <b>%</b> | <b>N</b>   | <b>%</b> | <b>N</b>   | <b>%</b> |  |  |  |
| <b>Total</b>                                     | 80           | 100,0 %  | 40         | 100,0 %  | 40         | 100,0 %  |  |  |  |
| <b>No</b>                                        | 59           | 73,8 %   | 28         | 70,0 %   | 31         | 77,5 %   |  |  |  |
| <b>Sí</b>                                        | 21           | 26,3 %   | 12         | 30,0 %   | 9          | 22,5 %   |  |  |  |
|                                                  |              |          |            |          |            |          |  |  |  |
| <b>T15b.- CONDUCTO QUE SANGRA según GRUPO</b>    |              |          |            |          |            |          |  |  |  |
|                                                  | <b>GRUPO</b> |          |            |          |            |          |  |  |  |
|                                                  | <b>Total</b> |          | <b>PEC</b> |          | <b>POT</b> |          |  |  |  |
|                                                  | <b>N</b>     | <b>%</b> | <b>N</b>   | <b>%</b> | <b>N</b>   | <b>%</b> |  |  |  |
| <b>Total</b>                                     | 21           | 100,0 %  | 12         | 100,0 %  | 9          | 100,0 %  |  |  |  |
| <b>V</b>                                         | 1            | 4,8 %    | 0          | 0,0 %    | 1          | 11,1 %   |  |  |  |
| <b>P</b>                                         | 9            | 42,9 %   | 7          | 58,3 %   | 2          | 22,2 %   |  |  |  |
| <b>D</b>                                         | 3            | 14,3 %   | 2          | 16,7 %   | 1          | 11,1 %   |  |  |  |
| <b>C</b>                                         | 7            | 33,3 %   | 2          | 16,7 %   | 5          | 55,6 %   |  |  |  |
| <b>MV/D</b>                                      | 1            | 4,8 %    | 1          | 8,3 %    | 0          | 0,0 %    |  |  |  |
|                                                  |              |          |            |          |            |          |  |  |  |
| <b>T16.- CALCIFICACION según GRUPO</b>           |              |          |            |          |            |          |  |  |  |
|                                                  | <b>GRUPO</b> |          |            |          |            |          |  |  |  |
|                                                  | <b>Total</b> |          | <b>PEC</b> |          | <b>POT</b> |          |  |  |  |
|                                                  | <b>N</b>     | <b>%</b> | <b>N</b>   | <b>%</b> | <b>N</b>   | <b>%</b> |  |  |  |
| <b>Total</b>                                     | 80           | 100,0 %  | 40         | 100,0 %  | 40         | 100,0 %  |  |  |  |
| <b>No</b>                                        | 73           | 91,3 %   | 36         | 90,0 %   | 37         | 92,5 %   |  |  |  |
| <b>Sí</b>                                        | 7            | 8,8 %    | 4          | 10,0 %   | 3          | 7,5 %    |  |  |  |
|                                                  |              |          |            |          |            |          |  |  |  |
| <b>T17.- RECONSTRUCCIÓN PRE-ENDO según GRUPO</b> |              |          |            |          |            |          |  |  |  |
|                                                  | <b>GRUPO</b> |          |            |          |            |          |  |  |  |
|                                                  | <b>Total</b> |          | <b>PEC</b> |          | <b>POT</b> |          |  |  |  |

|                                                          | N     | %       | N    | %       | N  | %       |  |  |  |
|----------------------------------------------------------|-------|---------|------|---------|----|---------|--|--|--|
| Total                                                    | 80    | 100,0 % | 40   | 100,0 % | 40 | 100,0 % |  |  |  |
| No                                                       | 49    | 61,3 %  | 23   | 57,5 %  | 26 | 65,0 %  |  |  |  |
| Sí                                                       | 31    | 38,8 %  | 17   | 42,5 %  | 14 | 35,0 %  |  |  |  |
|                                                          |       |         |      |         |    |         |  |  |  |
| <b>T18.- GRADO DOLOR PRE según GRUPO</b>                 |       |         |      |         |    |         |  |  |  |
|                                                          | GRUPO |         |      |         |    |         |  |  |  |
|                                                          | Total | PEC     | POT  |         |    |         |  |  |  |
| N                                                        | 80    | 40      | 40   |         |    |         |  |  |  |
| Media                                                    | 5,8   | 6,0     | 5,6  |         |    |         |  |  |  |
| Desviación típica                                        | 2,8   | 2,6     | 3,1  |         |    |         |  |  |  |
| Mínimo                                                   | 0,0   | 0,0     | 0,0  |         |    |         |  |  |  |
| Máximo                                                   | 10,0  | 10,0    | 10,0 |         |    |         |  |  |  |
| Percentil 25                                             | 4,0   | 4,0     | 4,0  |         |    |         |  |  |  |
| Mediana                                                  | 6,5   | 7,0     | 6,0  |         |    |         |  |  |  |
| Percentil 75                                             | 8,0   | 8,0     | 8,0  |         |    |         |  |  |  |
|                                                          |       |         |      |         |    |         |  |  |  |
| <b>T19.- GRADO NERVIOSISMO PRE según GRUPO</b>           |       |         |      |         |    |         |  |  |  |
|                                                          | GRUPO |         |      |         |    |         |  |  |  |
|                                                          | Total | PEC     | POT  |         |    |         |  |  |  |
| N                                                        | 80    | 40      | 40   |         |    |         |  |  |  |
| Media                                                    | 3,2   | 3,2     | 3,3  |         |    |         |  |  |  |
| Desviación típica                                        | 3,4   | 3,2     | 3,5  |         |    |         |  |  |  |
| Mínimo                                                   | 0,0   | 0,0     | 0,0  |         |    |         |  |  |  |
| Máximo                                                   | 10,0  | 10,0    | 10,0 |         |    |         |  |  |  |
| Percentil 25                                             | 0,0   | 0,0     | 0,0  |         |    |         |  |  |  |
| Mediana                                                  | 2,0   | 2,0     | 2,5  |         |    |         |  |  |  |
| Percentil 75                                             | 6,0   | 5,5     | 6,0  |         |    |         |  |  |  |
|                                                          |       |         |      |         |    |         |  |  |  |
| <b>T20.- GRADO MOLESTIAS AL MASTICAR PRE según GRUPO</b> |       |         |      |         |    |         |  |  |  |
|                                                          | GRUPO |         |      |         |    |         |  |  |  |

|                                                                                                 | Total             | PEC   | POT  |      |  |  |  |  |  |
|-------------------------------------------------------------------------------------------------|-------------------|-------|------|------|--|--|--|--|--|
| N                                                                                               | 80                | 40    | 40   |      |  |  |  |  |  |
| Media                                                                                           | 6,5               | 7,2   | 5,8  |      |  |  |  |  |  |
| Desviación típica                                                                               | 3,3               | 2,7   | 3,6  |      |  |  |  |  |  |
| Mínimo                                                                                          | 0,0               | 0,0   | 0,0  |      |  |  |  |  |  |
| Máximo                                                                                          | 10,0              | 10,0  | 10,0 |      |  |  |  |  |  |
| Percentil 25                                                                                    | 4,0               | 5,0   | 3,0  |      |  |  |  |  |  |
| Mediana                                                                                         | 7,0               | 8,0   | 6,5  |      |  |  |  |  |  |
| Percentil 75                                                                                    | 9,0               | 9,0   | 9,5  |      |  |  |  |  |  |
|                                                                                                 |                   |       |      |      |  |  |  |  |  |
| <b>T21- TIEMPOS DE INTERVENCIÓN (minutos) según GRUPO</b>                                       |                   |       |      |      |  |  |  |  |  |
|                                                                                                 |                   | GRUPO |      |      |  |  |  |  |  |
|                                                                                                 |                   | Total | PEC  | POT  |  |  |  |  |  |
| TIEMPO ANESTESIA<br>A APERTURA                                                                  | N                 | 79    | 39   | 40   |  |  |  |  |  |
|                                                                                                 | Media             | 16,6  | 19,2 | 14,2 |  |  |  |  |  |
|                                                                                                 | Desviación típica | 10,6  | 11,6 | 9,0  |  |  |  |  |  |
|                                                                                                 | Mínimo            | 3,0   | 6,0  | 3,0  |  |  |  |  |  |
|                                                                                                 | Máximo            | 63,0  | 63,0 | 50,0 |  |  |  |  |  |
|                                                                                                 | Percentil 25      | 10,0  | 12,0 | 8,5  |  |  |  |  |  |
|                                                                                                 | Mediana           | 14,0  | 15,0 | 11,5 |  |  |  |  |  |
|                                                                                                 | Percentil 75      | 20,0  | 22,0 | 19,0 |  |  |  |  |  |
| TIEMPO APERTURA<br>A FINAL                                                                      | N                 | 79    | 39   | 40   |  |  |  |  |  |
|                                                                                                 | Media             | 10,3  | 13,4 | 7,4  |  |  |  |  |  |
|                                                                                                 | Desviación típica | 5,6   | 6,1  | 3,0  |  |  |  |  |  |
|                                                                                                 | Mínimo            | 3,0   | 6,0  | 3,0  |  |  |  |  |  |
|                                                                                                 | Máximo            | 30,0  | 30,0 | 16,0 |  |  |  |  |  |
|                                                                                                 | Percentil 25      | 6,0   | 8,0  | 5,0  |  |  |  |  |  |
|                                                                                                 | Mediana           | 8,0   | 12,0 | 7,0  |  |  |  |  |  |
|                                                                                                 | Percentil 75      | 13,0  | 18,0 | 8,0  |  |  |  |  |  |
|                                                                                                 |                   |       |      |      |  |  |  |  |  |
| <b>T22- EVALUACIÓN DURACIÓN TRATAMIENTO (0-muy corto a 10-<br/>demasiado largo) según GRUPO</b> |                   |       |      |      |  |  |  |  |  |



|                                                                                       |                   | GRUPO |         |     |         |     |         |  |  |
|---------------------------------------------------------------------------------------|-------------------|-------|---------|-----|---------|-----|---------|--|--|
|                                                                                       |                   | Total | PEC     | POT |         |     |         |  |  |
| DURACION                                                                              | N                 | 80    | 40      | 40  |         |     |         |  |  |
|                                                                                       | Media             | 2,6   | 3,1     | 2,0 |         |     |         |  |  |
|                                                                                       | Desviación típica | 1,8   | 1,9     | 1,6 |         |     |         |  |  |
|                                                                                       | Mínimo            | 0,0   | 0,0     | 0,0 |         |     |         |  |  |
|                                                                                       | Máximo            | 10,0  | 10,0    | 5,0 |         |     |         |  |  |
|                                                                                       | Percentil 25      | 1,0   | 2,0     | 0,0 |         |     |         |  |  |
|                                                                                       | Mediana           | 3,0   | 3,0     | 3,0 |         |     |         |  |  |
|                                                                                       | Percentil 75      | 3,0   | 3,5     | 3,0 |         |     |         |  |  |
| T23- EVALUACIÓN INCOMODIDAD TRATAMIENTO (0-ninguna a 10-muy desagradable) según GRUPO |                   |       |         |     |         |     |         |  |  |
|                                                                                       |                   | GRUPO |         |     |         |     |         |  |  |
|                                                                                       |                   | Total | PEC     | POT |         |     |         |  |  |
| INCOMODIDAD                                                                           | N                 | 80    | 40      | 40  |         |     |         |  |  |
|                                                                                       | Media             | 1,6   | 1,5     | 1,6 |         |     |         |  |  |
|                                                                                       | Desviación típica | 1,9   | 2,0     | 1,8 |         |     |         |  |  |
|                                                                                       | Mínimo            | 0,0   | 0,0     | 0,0 |         |     |         |  |  |
|                                                                                       | Máximo            | 7,0   | 7,0     | 6,0 |         |     |         |  |  |
|                                                                                       | Percentil 25      | 0,0   | 0,0     | 0,0 |         |     |         |  |  |
|                                                                                       | Mediana           | 1,0   | 0,0     | 1,0 |         |     |         |  |  |
|                                                                                       | Percentil 75      | 3,0   | 3,0     | 3,0 |         |     |         |  |  |
| T24.- DATOS POST-OPERATORIOS según GRUPO                                              |                   |       |         |     |         |     |         |  |  |
|                                                                                       |                   | GRUPO |         |     |         |     |         |  |  |
|                                                                                       |                   | Total |         | PEC |         | POT |         |  |  |
|                                                                                       |                   | N     | %       | N   | %       | N   | %       |  |  |
| AINES                                                                                 | Total             | 80    | 100,0 % | 40  | 100,0 % | 40  | 100,0 % |  |  |
|                                                                                       | No                | 66    | 82,5 %  | 36  | 90,0 %  | 30  | 75,0 %  |  |  |
|                                                                                       | Sí                | 14    | 17,5 %  | 4   | 10,0 %  | 10  | 25,0 %  |  |  |

|                                          |                   |         |         |         |         |         |         |  |  |
|------------------------------------------|-------------------|---------|---------|---------|---------|---------|---------|--|--|
| ANALGESICOS                              | Total             | 80      | 100,0 % | 40      | 100,0 % | 40      | 100,0 % |  |  |
|                                          | No                | 64      | 80,0 %  | 30      | 75,0 %  | 34      | 85,0 %  |  |  |
|                                          | Sí                | 16      | 20,0 %  | 10      | 25,0 %  | 6       | 15,0 %  |  |  |
| DOLOR FUNCION                            | Total             | 80      | 100,0 % | 40      | 100,0 % | 40      | 100,0 % |  |  |
|                                          | No                | 68      | 85,0 %  | 36      | 90,0 %  | 32      | 80,0 %  |  |  |
|                                          | Sí                | 12      | 15,0 %  | 4       | 10,0 %  | 8       | 20,0 %  |  |  |
| DOLOR PREAURICULAR                       | Total             | 80      | 100,0 % | 40      | 100,0 % | 40      | 100,0 % |  |  |
|                                          | No                | 79      | 98,8 %  | 39      | 97,5 %  | 40      | 100,0 % |  |  |
|                                          | Sí                | 1       | 1,3 %   | 1       | 2,5 %   | 0       | 0,0 %   |  |  |
| INFLAMACION ENCIA                        | Total             | 80      | 100,0 % | 40      | 100,0 % | 40      | 100,0 % |  |  |
|                                          | No                | 76      | 95,0 %  | 38      | 95,0 %  | 38      | 95,0 %  |  |  |
|                                          | Sí                | 4       | 5,0 %   | 2       | 5,0 %   | 2       | 5,0 %   |  |  |
| T24b.- MEDICACIÓN DOLOR POST según GRUPO |                   |         |         |         |         |         |         |  |  |
|                                          | GRUPO             |         |         |         |         |         |         |  |  |
|                                          | Total             |         | PEC     |         | POT     |         |         |  |  |
|                                          | N                 | %       | N       | %       | N       | %       |         |  |  |
| Total                                    | 80                | 100,0 % | 40      | 100,0 % | 40      | 100,0 % |         |  |  |
| Ninguna                                  | 56                | 70,0 %  | 28      | 70,0 %  | 28      | 70,0 %  |         |  |  |
| Sólo AINES                               | 8                 | 10,0 %  | 2       | 5,0 %   | 6       | 15,0 %  |         |  |  |
| Sólo analgésicos                         | 10                | 12,5 %  | 8       | 20,0 %  | 2       | 5,0 %   |         |  |  |
| Ambos                                    | 6                 | 7,5 %   | 2       | 5,0 %   | 4       | 10,0 %  |         |  |  |
| T25- EVOLUCIÓN DOLOR (VAS) según GRUPO   |                   |         |         |         |         |         |         |  |  |
|                                          | GRUPO             |         |         |         |         |         |         |  |  |
|                                          | Total             | PEC     | POT     |         |         |         |         |  |  |
|                                          | N                 |         |         |         |         |         |         |  |  |
| DOLOR pre                                | N                 | 80      | 40      | 40      |         |         |         |  |  |
|                                          | Media             | 5,8     | 6,0     | 5,6     |         |         |         |  |  |
|                                          | Desviación típica | 2,8     | 2,6     | 3,1     |         |         |         |  |  |
|                                          | Mínimo            | 0,0     | 0,0     | 0,0     |         |         |         |  |  |
|                                          | Máximo            | 10,0    | 10,0    | 10,0    |         |         |         |  |  |
|                                          | Percentil 25      | 4,0     | 4,0     | 4,0     |         |         |         |  |  |

|                                                  |                   |       |      |      |  |  |  |  |  |
|--------------------------------------------------|-------------------|-------|------|------|--|--|--|--|--|
| DOLOR 6h                                         | Mediana           | 6,5   | 7,0  | 6,0  |  |  |  |  |  |
|                                                  | Percentil 75      | 8,0   | 8,0  | 8,0  |  |  |  |  |  |
|                                                  | N                 | 80    | 40   | 40   |  |  |  |  |  |
|                                                  | Media             | 2,1   | 2,2  | 2,0  |  |  |  |  |  |
|                                                  | Desviación típica | 2,4   | 2,6  | 2,3  |  |  |  |  |  |
|                                                  | Mínimo            | 0,0   | 0,0  | 0,0  |  |  |  |  |  |
|                                                  | Máximo            | 9,0   | 9,0  | 9,0  |  |  |  |  |  |
|                                                  | Percentil 25      | 0,0   | 0,0  | 0,0  |  |  |  |  |  |
|                                                  | Mediana           | 2,0   | 2,0  | 1,0  |  |  |  |  |  |
| DOLOR 24h                                        | Percentil 75      | 3,0   | 3,5  | 3,0  |  |  |  |  |  |
|                                                  | N                 | 80    | 40   | 40   |  |  |  |  |  |
|                                                  | Media             | 1,5   | 1,8  | 1,3  |  |  |  |  |  |
|                                                  | Desviación típica | 2,1   | 2,3  | 2,0  |  |  |  |  |  |
|                                                  | Mínimo            | 0,0   | 0,0  | 0,0  |  |  |  |  |  |
|                                                  | Máximo            | 9,0   | 9,0  | 7,0  |  |  |  |  |  |
|                                                  | Percentil 25      | 0,0   | 0,0  | 0,0  |  |  |  |  |  |
|                                                  | Mediana           | 1,0   | 1,0  | 0,0  |  |  |  |  |  |
|                                                  | Percentil 75      | 2,0   | 2,5  | 1,5  |  |  |  |  |  |
| DOLOR 3d                                         | N                 | 80    | 40   | 40   |  |  |  |  |  |
|                                                  | Media             | 1,3   | 1,3  | 1,3  |  |  |  |  |  |
|                                                  | Desviación típica | 2,0   | 2,1  | 2,0  |  |  |  |  |  |
|                                                  | Mínimo            | 0,0   | 0,0  | 0,0  |  |  |  |  |  |
|                                                  | Máximo            | 10,0  | 10,0 | 10,0 |  |  |  |  |  |
|                                                  | Percentil 25      | 0,0   | 0,0  | 0,0  |  |  |  |  |  |
|                                                  | Mediana           | 0,0   | 0,0  | 0,5  |  |  |  |  |  |
|                                                  | Percentil 75      | 2,0   | 2,0  | 2,0  |  |  |  |  |  |
|                                                  |                   |       |      |      |  |  |  |  |  |
| T25b- REDUCCIÓN DOLOR (VAS) 3d - PRE según GRUPO |                   |       |      |      |  |  |  |  |  |
|                                                  |                   | GRUPO |      |      |  |  |  |  |  |
|                                                  |                   | Total | PEC  | POT  |  |  |  |  |  |
|                                                  | N                 | 80    | 40   | 40   |  |  |  |  |  |
|                                                  | Media             | -4,5  | -4,7 | -4,3 |  |  |  |  |  |

|                                                                                                      |                   |       |         |      |         |     |         |  |  |  |
|------------------------------------------------------------------------------------------------------|-------------------|-------|---------|------|---------|-----|---------|--|--|--|
| DIF.DOLOR.3d_PRE                                                                                     | Desviación típica | 3,5   | 3,2     | 3,8  |         |     |         |  |  |  |
|                                                                                                      | Mínimo            | -9,0  | -9,0    | -9,0 |         |     |         |  |  |  |
|                                                                                                      | Máximo            | 6,0   | 4,0     | 6,0  |         |     |         |  |  |  |
|                                                                                                      | Percentil 25      | -7,0  | -7,0    | -7,0 |         |     |         |  |  |  |
|                                                                                                      | Mediana           | -6,0  | -6,0    | -5,0 |         |     |         |  |  |  |
|                                                                                                      | Percentil 75      | -1,5  | -1,5    | -1,5 |         |     |         |  |  |  |
|                                                                                                      |                   |       |         |      |         |     |         |  |  |  |
| T25c.- TIEMPO HASTA NO DOLOR / DOLOR LEVE según GRUPO                                                |                   |       |         |      |         |     |         |  |  |  |
|                                                                                                      |                   | GRUPO |         |      |         |     |         |  |  |  |
|                                                                                                      |                   | Total |         | PEC  |         | POT |         |  |  |  |
|                                                                                                      |                   | N     | %       | N    | %       | N   | %       |  |  |  |
| TIEMPO HASTA NO DOLOR DEFINITIVO                                                                     | Total             | 80    | 100,0 % | 40   | 100,0 % | 40  | 100,0 % |  |  |  |
|                                                                                                      | Pre               | 2     | 2,5 %   | 1    | 2,5 %   | 1   | 2,5 %   |  |  |  |
|                                                                                                      | 6h                | 20    | 25,0 %  | 10   | 25,0 %  | 10  | 25,0 %  |  |  |  |
|                                                                                                      | 24h               | 7     | 8,8 %   | 2    | 5,0 %   | 5   | 12,5 %  |  |  |  |
|                                                                                                      | 3d                | 12    | 15,0 %  | 9    | 22,5 %  | 3   | 7,5 %   |  |  |  |
|                                                                                                      | No se alcanza     | 39    | 48,8 %  | 18   | 45,0 %  | 21  | 52,5 %  |  |  |  |
| TIEMPO HASTA DOLOR LEVE DEFINITIVO                                                                   | Total             | 80    | 100,0 % | 40   | 100,0 % | 40  | 100,0 % |  |  |  |
|                                                                                                      | Pre               | 4     | 5,0 %   | 2    | 5,0 %   | 2   | 5,0 %   |  |  |  |
|                                                                                                      | 6h                | 53    | 66,3 %  | 24   | 60,0 %  | 29  | 72,5 %  |  |  |  |
|                                                                                                      | 24h               | 7     | 8,8 %   | 5    | 12,5 %  | 2   | 5,0 %   |  |  |  |
|                                                                                                      | 3d                | 7     | 8,8 %   | 4    | 10,0 %  | 3   | 7,5 %   |  |  |  |
|                                                                                                      | No se alcanza     | 9     | 11,3 %  | 5    | 12,5 %  | 4   | 10,0 %  |  |  |  |
|                                                                                                      |                   |       |         |      |         |     |         |  |  |  |
| T26- EVALUACIÓN SATISFACCIÓN GENERAL TRATAMIENTO (0-nada satisfecho a 10-muy satisfecho) según GRUPO |                   |       |         |      |         |     |         |  |  |  |
|                                                                                                      |                   | GRUPO |         |      |         |     |         |  |  |  |
|                                                                                                      |                   | Total | PEC     | POT  |         |     |         |  |  |  |
| SATISFACCION                                                                                         | N                 | 80    | 40      | 40   |         |     |         |  |  |  |
|                                                                                                      | Media             | 9,1   | 9,2     | 9,1  |         |     |         |  |  |  |
|                                                                                                      | Desviación típica | 1,8   | 1,7     | 2,0  |         |     |         |  |  |  |
|                                                                                                      | Mínimo            | 1,0   | 1,0     | 1,0  |         |     |         |  |  |  |

|           |              |      |      |      |  |  |  |  |  |
|-----------|--------------|------|------|------|--|--|--|--|--|
| DOLOR pre | Máximo       | 10,0 | 10,0 | 10,0 |  |  |  |  |  |
|           | Percentil 25 | 9,0  | 9,0  | 9,0  |  |  |  |  |  |
|           | Mediana      | 10,0 | 10,0 | 10,0 |  |  |  |  |  |
|           | Percentil 75 | 10,0 | 10,0 | 10,0 |  |  |  |  |  |
|           |              |      |      |      |  |  |  |  |  |

## T27- EVOLUCIÓN DOLOR (VAS) según GRUPO y AINES PRE

|           |                   | GRUPO     |      |      |           |     |      |           |      |
|-----------|-------------------|-----------|------|------|-----------|-----|------|-----------|------|
|           |                   | Total     |      |      | PEC       |     |      | POT       |      |
|           |                   | AINES PRE |      |      | AINES PRE |     |      | AINES PRE |      |
|           |                   | Total     | No   | Sí   | Total     | No  | Sí   | Total     | No   |
| DOLOR pre | N                 | 80        | 43   | 37   | 40        | 23  | 17   | 40        | 20   |
|           | Media             | 5,8       | 5,4  | 6,2  | 6,0       | 5,2 | 7,0  | 5,6       | 5,8  |
|           | Desviación típica | 2,8       | 2,8  | 2,8  | 2,6       | 2,8 | 1,8  | 3,1       | 2,8  |
|           | Mínimo            | 0,0       | 0,0  | 0,0  | 0,0       | 0,0 | 3,0  | 0,0       | 0,0  |
|           | Máximo            | 10,0      | 10,0 | 10,0 | 10,0      | 9,0 | 10,0 | 10,0      | 10,0 |
|           | Percentil 25      | 4,0       | 4,0  | 4,0  | 4,0       | 3,0 | 7,0  | 4,0       | 4,5  |
|           | Mediana           | 6,5       | 6,0  | 7,0  | 7,0       | 6,0 | 7,0  | 6,0       | 6,0  |
|           | Percentil 75      | 8,0       | 7,0  | 8,0  | 8,0       | 7,0 | 8,0  | 8,0       | 7,5  |
| DOLOR 6h  | N                 | 80        | 43   | 37   | 40        | 23  | 17   | 40        | 20   |
|           | Media             | 2,1       | 1,9  | 2,4  | 2,2       | 1,8 | 2,8  | 2,0       | 2,1  |
|           | Desviación típica | 2,4       | 2,4  | 2,5  | 2,6       | 2,4 | 2,8  | 2,3       | 2,5  |
|           | Mínimo            | 0,0       | 0,0  | 0,0  | 0,0       | 0,0 | 0,0  | 0,0       | 0,0  |
|           | Máximo            | 9,0       | 9,0  | 9,0  | 9,0       | 9,0 | 8,0  | 9,0       | 7,0  |
|           | Percentil 25      | 0,0       | 0,0  | 0,0  | 0,0       | 0,0 | 0,0  | 0,0       | 0,0  |
|           | Mediana           | 2,0       | 1,0  | 2,0  | 2,0       | 1,0 | 3,0  | 1,0       | 1,0  |
|           | Percentil 75      | 3,0       | 3,0  | 3,0  | 3,5       | 3,0 | 4,0  | 3,0       | 3,0  |
| DOLOR 24h | N                 | 80        | 43   | 37   | 40        | 23  | 17   | 40        | 20   |
|           | Media             | 1,5       | 1,5  | 1,5  | 1,8       | 1,7 | 1,8  | 1,3       | 1,3  |
|           | Desviación típica | 2,1       | 2,1  | 2,1  | 2,3       | 2,3 | 2,2  | 2,0       | 1,9  |
|           | Mínimo            | 0,0       | 0,0  | 0,0  | 0,0       | 0,0 | 0,0  | 0,0       | 0,0  |
|           | Máximo            | 9,0       | 9,0  | 8,0  | 9,0       | 9,0 | 8,0  | 7,0       | 5,0  |
|           | Percentil 25      | 0,0       | 0,0  | 0,0  | 0,0       | 0,0 | 0,0  | 0,0       | 0,0  |

|          |                   |      |      |      |      |      |     |      |     |
|----------|-------------------|------|------|------|------|------|-----|------|-----|
| DOLOR 3d | Mediana           | 1,0  | 1,0  | 1,0  | 1,0  | 1,0  | 1,0 | 0,0  | 0,0 |
|          | Percentil 75      | 2,0  | 2,0  | 2,0  | 2,5  | 2,0  | 3,0 | 1,5  | 2,0 |
|          | N                 | 80   | 43   | 37   | 40   | 23   | 17  | 40   | 20  |
|          | Media             | 1,3  | 1,2  | 1,4  | 1,3  | 1,0  | 1,5 | 1,3  | 1,4 |
|          | Desviación típica | 2,0  | 1,9  | 2,2  | 2,1  | 2,3  | 1,8 | 2,0  | 1,5 |
|          | Mínimo            | 0,0  | 0,0  | 0,0  | 0,0  | 0,0  | 0,0 | 0,0  | 0,0 |
|          | Máximo            | 10,0 | 10,0 | 10,0 | 10,0 | 10,0 | 6,0 | 10,0 | 5,0 |
|          | Percentil 25      | 0,0  | 0,0  | 0,0  | 0,0  | 0,0  | 0,0 | 0,0  | 0,0 |
|          | Mediana           | 0,0  | 0,0  | 0,0  | 0,0  | 0,0  | 1,0 | 0,5  | 1,0 |
|          | Percentil 75      | 2,0  | 2,0  | 2,0  | 2,0  | 2,0  | 2,0 | 2,0  | 2,5 |

#### T27b- REDUCCIÓN DOLOR (VAS) 3d - PRE según GRUPO y AINES PRE

|                  |                   | GRUPO     |      |      |           |      |      |           |      |
|------------------|-------------------|-----------|------|------|-----------|------|------|-----------|------|
|                  |                   | Total     |      |      | PEC       |      |      | POT       |      |
|                  |                   | AINES PRE |      |      | AINES PRE |      |      | AINES PRE |      |
|                  |                   | Total     | No   | Sí   | Total     | No   | Sí   | Total     | No   |
| DIF.DOLOR.3d_PRE | N                 | 80        | 43   | 37   | 40        | 23   | 17   | 40        | 20   |
|                  | Media             | -4,5      | -4,3 | -4,8 | -4,7      | -4,1 | -5,5 | -4,3      | -4,4 |
|                  | Desviación típica | 3,5       | 3,2  | 3,8  | 3,2       | 3,5  | 2,5  | 3,8       | 3,0  |
|                  | Mínimo            | -9,0      | -9,0 | -9,0 | -9,0      | -9,0 | -9,0 | -9,0      | -8,0 |
|                  | Máximo            | 6,0       | 4,0  | 6,0  | 4,0       | 4,0  | -1,0 | 6,0       | 3,0  |
|                  | Percentil 25      | -7,0      | -7,0 | -8,0 | -7,0      | -7,0 | -8,0 | -7,0      | -6,5 |
|                  | Mediana           | -6,0      | -5,0 | -6,0 | -6,0      | -6,0 | -6,0 | -5,0      | -5,0 |
|                  | Percentil 75      | -1,5      | -1,0 | -2,0 | -1,5      | -1,0 | -4,0 | -1,5      | -2,5 |

#### T27c.- TIEMPO HASTA NO DOLOR / DOLOR LEVE según GRUPO y AINES PRE

|  |  | Total     |   |    |   |    |   |       |   |
|--|--|-----------|---|----|---|----|---|-------|---|
|  |  | AINES PRE |   |    |   |    |   |       |   |
|  |  | Total     |   | No |   | Sí |   | Total |   |
|  |  | N         | % | N  | % | N  | % | N     | % |

|                                    |               |    |         |    |         |    |         |    |         |
|------------------------------------|---------------|----|---------|----|---------|----|---------|----|---------|
| TIEMPO HASTA NO DOLOR DEFINITIVO   | Total         | 80 | 100,0 % | 43 | 100,0 % | 37 | 100,0 % | 40 | 100,0 % |
|                                    | Pre           | 2  | 2,5 %   | 1  | 2,3 %   | 1  | 2,7 %   | 1  | 2,5 %   |
|                                    | 6h            | 20 | 25,0 %  | 12 | 27,9 %  | 8  | 21,6 %  | 10 | 25,0 %  |
|                                    | 24h           | 7  | 8,8 %   | 3  | 7,0 %   | 4  | 10,8 %  | 2  | 5,0 %   |
|                                    | 3d            | 12 | 15,0 %  | 6  | 14,0 %  | 6  | 16,2 %  | 9  | 22,5 %  |
|                                    | No se alcanza | 39 | 48,8 %  | 21 | 48,8 %  | 18 | 48,6 %  | 18 | 45,0 %  |
| TIEMPO HASTA DOLOR LEVE DEFINITIVO | Total         | 80 | 100,0 % | 43 | 100,0 % | 37 | 100,0 % | 40 | 100,0 % |
|                                    | Pre           | 4  | 5,0 %   | 2  | 4,7 %   | 2  | 5,4 %   | 2  | 5,0 %   |
|                                    | 6h            | 53 | 66,3 %  | 30 | 69,8 %  | 23 | 62,2 %  | 24 | 60,0 %  |
|                                    | 24h           | 7  | 8,8 %   | 3  | 7,0 %   | 4  | 10,8 %  | 5  | 12,5 %  |
|                                    | 3d            | 7  | 8,8 %   | 5  | 11,6 %  | 2  | 5,4 %   | 4  | 10,0 %  |
|                                    | No se alcanza | 9  | 11,3 %  | 3  | 7,0 %   | 6  | 16,2 %  | 5  | 12,5 %  |
|                                    |               |    |         |    |         |    |         |    |         |

#### T28- EVALUACIÓN SATISFACCIÓN GENERAL TRATAMIENTO (0-nada satisfecho a 10-muy satisfecho) según GRUPO y AINES PRE

|              |                   | GRUPO     |      |      |           |      |      |           |      |
|--------------|-------------------|-----------|------|------|-----------|------|------|-----------|------|
|              |                   | Total     |      |      | PEC       |      |      | POT       |      |
|              |                   | AINES PRE |      |      | AINES PRE |      |      | AINES PRE |      |
|              |                   | Total     | No   | Sí   | Total     | No   | Sí   | Total     | No   |
| SATISFACCION | N                 | 80        | 43   | 37   | 40        | 23   | 17   | 40        | 20   |
|              | Media             | 9,1       | 9,2  | 9,0  | 9,2       | 9,1  | 9,4  | 9,1       | 9,4  |
|              | Desviación típica | 1,8       | 1,7  | 2,0  | 1,7       | 2,0  | 1,3  | 2,0       | 1,3  |
|              | Mínimo            | 1,0       | 1,0  | 1,0  | 1,0       | 1,0  | 5,0  | 1,0       | 6,0  |
|              | Máximo            | 10,0      | 10,0 | 10,0 | 10,0      | 10,0 | 10,0 | 10,0      | 10,0 |
|              | Percentil 25      | 9,0       | 9,0  | 9,0  | 9,0       | 8,0  | 9,0  | 9,0       | 10,0 |
|              | Mediana           | 10,0      | 10,0 | 10,0 | 10,0      | 10,0 | 10,0 | 10,0      | 10,0 |
|              | Percentil 75      | 10,0      | 10,0 | 10,0 | 10,0      | 10,0 | 10,0 | 10,0      | 10,0 |
|              |                   |           |      |      |           |      |      |           |      |

#### T29- EVOLUCIÓN DOLOR (VAS) según GRUPO y PAA

|  |  | GRUPO |  |  |     |  |  |     |  |
|--|--|-------|--|--|-----|--|--|-----|--|
|  |  | Total |  |  | PEC |  |  | POT |  |
|  |  | PAA   |  |  | PAA |  |  | PAA |  |

|           |                   | Total | No   | Sí   | Total | No   | Sí   | Total | No   |
|-----------|-------------------|-------|------|------|-------|------|------|-------|------|
| DOLOR pre | N                 | 80    | 47   | 33   | 40    | 20   | 20   | 40    | 27   |
|           | Media             | 5,8   | 5,2  | 6,6  | 6,0   | 5,1  | 6,8  | 5,6   | 5,3  |
|           | Desviación típica | 2,8   | 2,8  | 2,8  | 2,6   | 2,9  | 2,0  | 3,1   | 2,7  |
|           | Mínimo            | 0,0   | 0,0  | 0,0  | 0,0   | 0,0  | 3,0  | 0,0   | 0,0  |
|           | Máximo            | 10,0  | 10,0 | 10,0 | 10,0  | 9,0  | 10,0 | 10,0  | 10,0 |
|           | Percentil 25      | 4,0   | 3,0  | 6,0  | 4,0   | 2,5  | 6,0  | 4,0   | 4,0  |
|           | Mediana           | 6,5   | 6,0  | 7,0  | 7,0   | 6,0  | 7,0  | 6,0   | 6,0  |
|           | Percentil 75      | 8,0   | 7,0  | 8,0  | 8,0   | 7,5  | 8,0  | 8,0   | 7,0  |
| DOLOR 6h  | N                 | 80    | 47   | 33   | 40    | 20   | 20   | 40    | 27   |
|           | Media             | 2,1   | 2,0  | 2,3  | 2,2   | 1,7  | 2,8  | 2,0   | 2,2  |
|           | Desviación típica | 2,4   | 2,5  | 2,4  | 2,6   | 2,5  | 2,6  | 2,3   | 2,5  |
|           | Mínimo            | 0,0   | 0,0  | 0,0  | 0,0   | 0,0  | 0,0  | 0,0   | 0,0  |
|           | Máximo            | 9,0   | 9,0  | 8,0  | 9,0   | 9,0  | 8,0  | 9,0   | 9,0  |
|           | Percentil 25      | 0,0   | 0,0  | 0,0  | 0,0   | 0,0  | 0,0  | 0,0   | 0,0  |
|           | Mediana           | 2,0   | 1,0  | 2,0  | 2,0   | 0,0  | 2,5  | 1,0   | 1,0  |
|           | Percentil 75      | 3,0   | 3,0  | 4,0  | 3,5   | 2,5  | 4,0  | 3,0   | 3,0  |
| DOLOR 24h | N                 | 80    | 47   | 33   | 40    | 20   | 20   | 40    | 27   |
|           | Media             | 1,5   | 1,5  | 1,5  | 1,8   | 1,8  | 1,8  | 1,3   | 1,3  |
|           | Desviación típica | 2,1   | 2,3  | 1,9  | 2,3   | 2,5  | 2,1  | 2,0   | 2,1  |
|           | Mínimo            | 0,0   | 0,0  | 0,0  | 0,0   | 0,0  | 0,0  | 0,0   | 0,0  |
|           | Máximo            | 9,0   | 9,0  | 8,0  | 9,0   | 9,0  | 8,0  | 7,0   | 7,0  |
|           | Percentil 25      | 0,0   | 0,0  | 0,0  | 0,0   | 0,0  | 0,0  | 0,0   | 0,0  |
|           | Mediana           | 1,0   | 0,0  | 1,0  | 1,0   | 1,0  | 1,0  | 0,0   | 0,0  |
|           | Percentil 75      | 2,0   | 2,0  | 2,0  | 2,5   | 2,0  | 3,0  | 1,5   | 2,0  |
| DOLOR 3d  | N                 | 80    | 47   | 33   | 40    | 20   | 20   | 40    | 27   |
|           | Media             | 1,3   | 1,4  | 1,2  | 1,3   | 1,2  | 1,3  | 1,3   | 1,5  |
|           | Desviación típica | 2,0   | 2,3  | 1,6  | 2,1   | 2,4  | 1,8  | 2,0   | 2,2  |
|           | Mínimo            | 0,0   | 0,0  | 0,0  | 0,0   | 0,0  | 0,0  | 0,0   | 0,0  |
|           | Máximo            | 10,0  | 10,0 | 6,0  | 10,0  | 10,0 | 6,0  | 10,0  | 10,0 |
|           | Percentil 25      | 0,0   | 0,0  | 0,0  | 0,0   | 0,0  | 0,0  | 0,0   | 0,0  |
|           | Mediana           | 0,0   | 0,0  | 0,0  | 0,0   | 0,0  | 0,5  | 0,5   | 1,0  |



|              |     |     |     |     |     |     |     |     |     |
|--------------|-----|-----|-----|-----|-----|-----|-----|-----|-----|
| Percentil 75 | 2,0 | 2,0 | 2,0 | 2,0 | 2,0 | 2,0 | 2,0 | 2,0 | 3,0 |
|              |     |     |     |     |     |     |     |     |     |

#### T29b- REDUCCIÓN DOLOR (VAS) 3d - PRE según GRUPO y PAA

|                  |                   | GRUPO |      |      |       |      |      |       |      |
|------------------|-------------------|-------|------|------|-------|------|------|-------|------|
|                  |                   | Total |      |      | PEC   |      |      | POT   |      |
|                  |                   | PAA   |      |      | PAA   |      |      | PAA   |      |
|                  |                   | Total | No   | Sí   | Total | No   | Sí   | Total | No   |
| DIF.DOLOR.3d_PRE | N                 | 80    | 47   | 33   | 40    | 20   | 20   | 40    | 27   |
|                  | Media             | -4,5  | -3,9 | -5,4 | -4,7  | -3,9 | -5,5 | -4,3  | -3,9 |
|                  | Desviación típica | 3,5   | 3,6  | 3,2  | 3,2   | 3,6  | 2,5  | 3,8   | 3,6  |
|                  | Mínimo            | -9,0  | -8,0 | -9,0 | -9,0  | -8,0 | -9,0 | -9,0  | -8,0 |
|                  | Máximo            | 6,0   | 6,0  | 4,0  | 4,0   | 4,0  | -1,0 | 6,0   | 6,0  |
|                  | Percentil 25      | -7,0  | -6,0 | -8,0 | -7,0  | -6,5 | -8,0 | -7,0  | -6,0 |
|                  | Mediana           | -6,0  | -5,0 | -6,0 | -6,0  | -6,0 | -6,0 | -5,0  | -5,0 |
|                  | Percentil 75      | -1,5  | -1,0 | -3,0 | -1,5  | -1,0 | -3,5 | -1,5  | -1,0 |
|                  |                   |       |      |      |       |      |      |       |      |

#### T29c.- TIEMPO HASTA NO DOLOR / DOLOR LEVE según GRUPO y PAA

|                                  |               | Total |         |    |         |    |         |       |         |
|----------------------------------|---------------|-------|---------|----|---------|----|---------|-------|---------|
|                                  |               | PAA   |         |    |         |    |         |       |         |
|                                  |               | Total |         | No |         | Sí |         | Total |         |
|                                  |               | N     | %       | N  | %       | N  | %       | N     | %       |
| TIEMPO HASTA NO DOLOR DEFINITIVO | Total         | 80    | 100,0 % | 47 | 100,0 % | 33 | 100,0 % | 40    | 100,0 % |
|                                  | Pre           | 2     | 2,5 %   | 1  | 2,1 %   | 1  | 3,0 %   | 1     | 2,5 %   |
|                                  | 6h            | 20    | 25,0 %  | 14 | 29,8 %  | 6  | 18,2 %  | 10    | 25,0 %  |
|                                  | 24h           | 7     | 8,8 %   | 4  | 8,5 %   | 3  | 9,1 %   | 2     | 5,0 %   |
|                                  | 3d            | 12    | 15,0 %  | 5  | 10,6 %  | 7  | 21,2 %  | 9     | 22,5 %  |
|                                  | No se alcanza | 39    | 48,8 %  | 23 | 48,9 %  | 16 | 48,5 %  | 18    | 45,0 %  |
|                                  |               |       |         |    |         |    |         |       |         |
| TIEMPO HASTA DOLOR LEVE          | Total         | 80    | 100,0 % | 47 | 100,0 % | 33 | 100,0 % | 40    | 100,0 % |
|                                  | Pre           | 4     | 5,0 %   | 2  | 4,3 %   | 2  | 6,1 %   | 2     | 5,0 %   |
|                                  | 6h            | 53    | 66,3 %  | 33 | 70,2 %  | 20 | 60,6 %  | 24    | 60,0 %  |

|                           |               |   |        |   |        |   |        |   |        |
|---------------------------|---------------|---|--------|---|--------|---|--------|---|--------|
| DOLOR LEVEL<br>DEFINITIVO | 24h           | 7 | 8,8 %  | 3 | 6,4 %  | 4 | 12,1 % | 5 | 12,5 % |
|                           | 3d            | 7 | 8,8 %  | 4 | 8,5 %  | 3 | 9,1 %  | 4 | 10,0 % |
|                           | No se alcanza | 9 | 11,3 % | 5 | 10,6 % | 4 | 12,1 % | 5 | 12,5 % |

### T30- EVALUACIÓN SATISFACCIÓN GENERAL TRATAMIENTO (0-nada satisfecho a 10-muy satisfecho) según GRUPO y PAA

|              |                   | GRUPO |      |      |       |      |      |       |      |
|--------------|-------------------|-------|------|------|-------|------|------|-------|------|
|              |                   | Total |      |      | PEC   |      |      | POT   |      |
|              |                   | PAA   |      |      | PAA   |      |      | PAA   |      |
|              |                   | Total | No   | Sí   | Total | No   | Sí   | Total | No   |
|              |                   |       |      |      |       |      |      |       |      |
| SATISFACCION | N                 | 80    | 47   | 33   | 40    | 20   | 20   | 40    | 27   |
|              | Media             | 9,1   | 9,1  | 9,2  | 9,2   | 9,2  | 9,3  | 9,1   | 9,1  |
|              | Desviación típica | 1,8   | 2,1  | 1,3  | 1,7   | 2,1  | 1,3  | 2,0   | 2,3  |
|              | Mínimo            | 1,0   | 1,0  | 5,0  | 1,0   | 1,0  | 5,0  | 1,0   | 1,0  |
|              | Máximo            | 10,0  | 10,0 | 10,0 | 10,0  | 10,0 | 10,0 | 10,0  | 10,0 |
|              | Percentil 25      | 9,0   | 9,0  | 9,0  | 9,0   | 9,0  | 9,0  | 9,0   | 10,0 |
|              | Mediana           | 10,0  | 10,0 | 10,0 | 10,0  | 10,0 | 10,0 | 10,0  | 10,0 |
|              | Percentil 75      | 10,0  | 10,0 | 10,0 | 10,0  | 10,0 | 10,0 | 10,0  | 10,0 |

### T31.- DOLOR AL MASTICAR POST-OPERATORIO según GRUPO y PAA

|       |  | GRUPO |         |    |         |    |         |       |         |
|-------|--|-------|---------|----|---------|----|---------|-------|---------|
|       |  | Total |         |    | PEC     |    |         | POT   |         |
|       |  | PAA   |         |    | PAA     |    |         | PAA   |         |
|       |  | Total | No      | Sí | Total   | No | Sí      | Total | No      |
|       |  | N     | %       | N  | %       | N  | %       | N     | %       |
| Total |  | 80    | 100,0 % | 47 | 100,0 % | 33 | 100,0 % | 40    | 100,0 % |
| No    |  | 68    | 85,0 %  | 40 | 85,1 %  | 28 | 84,8 %  | 36    | 90,0 %  |
| Sí    |  | 12    | 15,0 %  | 7  | 14,9 %  | 5  | 15,2 %  | 4     | 10,0 %  |

### T31b.- GRADO MOLESTIAS AL MASTICAR PRE según PAA y toma AINES PRE

|  |  | AINES PRE |    |    |
|--|--|-----------|----|----|
|  |  | Total     | No | Sí |

|                   | PAA   |      |      | PAA   |      |      | PAA   |      |      |
|-------------------|-------|------|------|-------|------|------|-------|------|------|
|                   | Total | No   | Sí   | Total | No   | Sí   | Total | No   | Sí   |
| N                 | 80    | 47   | 33   | 43    | 33   | 10   | 37    | 14   | 23   |
| Media             | 6,5   | 5,3  | 8,2  | 6,0   | 5,5  | 7,7  | 7,1   | 4,7  | 8,5  |
| Desviación típica | 3,3   | 3,4  | 2,0  | 3,3   | 3,3  | 2,8  | 3,2   | 3,6  | 1,7  |
| Mínimo            | 0,0   | 0,0  | 2,0  | 0,0   | 0,0  | 2,0  | 0,0   | 0,0  | 4,0  |
| Máximo            | 10,0  | 10,0 | 10,0 | 10,0  | 10,0 | 10,0 | 10,0  | 10,0 | 10,0 |
| Percentil 25      | 4,0   | 3,0  | 7,0  | 4,0   | 3,0  | 7,0  | 5,0   | 1,0  | 7,0  |
| Mediana           | 7,0   | 5,0  | 9,0  | 6,0   | 5,0  | 9,0  | 8,0   | 4,5  | 9,0  |
| Percentil 75      | 9,0   | 8,0  | 10,0 | 9,0   | 9,0  | 10,0 | 10,0  | 8,0  | 10,0 |
|                   |       |      |      |       |      |      |       |      |      |

#### T31c.- MEDICACIÓN DOLOR POST según GRUPO y PAA

|                  | GRUPO |         |    |         |    |         | PAA   |         |    |
|------------------|-------|---------|----|---------|----|---------|-------|---------|----|
|                  | Total |         |    |         |    |         | PE    |         |    |
|                  | PAA   |         |    |         |    |         | PA    |         |    |
|                  | Total |         | No |         | Sí |         | Total |         | N  |
|                  | N     | %       | N  | %       | N  | %       | N     | %       | N  |
| Total            | 80    | 100,0 % | 47 | 100,0 % | 33 | 100,0 % | 40    | 100,0 % | 20 |
| Ninguna          | 56    | 70,0 %  | 36 | 76,6 %  | 20 | 60,6 %  | 28    | 70,0 %  | 17 |
| Sólo AINES       | 8     | 10,0 %  | 4  | 8,5 %   | 4  | 12,1 %  | 2     | 5,0 %   | 1  |
| Sólo analgésicos | 10    | 12,5 %  | 4  | 8,5 %   | 6  | 18,2 %  | 8     | 20,0 %  | 2  |
| Ambos            | 6     | 7,5 %   | 3  | 6,4 %   | 3  | 9,1 %   | 2     | 5,0 %   | 0  |
|                  |       |         |    |         |    |         |       |         |    |

#### T32- EVOLUCIÓN DOLOR (VAS) según GRUPO y MOLESTIA MASTICAR pre

|                   |     | GRUPO                 |                |         |                       |                |         |                      |                |
|-------------------|-----|-----------------------|----------------|---------|-----------------------|----------------|---------|----------------------|----------------|
|                   |     | Total                 |                |         | PEC                   |                |         | POT                  |                |
|                   |     | MOLESTIA MASTICAR PRE |                |         | MOLESTIA MASTICAR PRE |                |         | MOLESTIA MASTICAR PE |                |
|                   |     | Total                 | Hasta moderada | Intensa | Total                 | Hasta moderada | Intensa | Total                | Hasta moderada |
| N                 | 80  | 34                    | 46             | 40      | 14                    | 26             | 40      | 20                   |                |
| Media             | 5,8 | 4,6                   | 6,7            | 6,0     | 4,6                   | 6,7            | 5,6     | 4,5                  |                |
| Desviación típica | 2,8 | 2,7                   | 2,6            | 2,6     | 2,8                   | 2,2            | 3,1     | 2,8                  |                |

|           |                   |      |      |      |      |      |      |      |      |
|-----------|-------------------|------|------|------|------|------|------|------|------|
| DOLOR pre | Mínimo            | 0,0  | 0,0  | 0,0  | 0,0  | 0,0  | 0,0  | 0,0  | 0,0  |
|           | Máximo            | 10,0 | 10,0 | 10,0 | 10,0 | 10,0 | 9,0  | 10,0 | 8,0  |
|           | Percentil 25      | 4,0  | 2,0  | 6,0  | 4,0  | 3,0  | 6,0  | 4,0  | 2,0  |
|           | Mediana           | 6,5  | 5,0  | 7,0  | 7,0  | 5,0  | 7,0  | 6,0  | 5,0  |
|           | Percentil 75      | 8,0  | 6,0  | 8,0  | 8,0  | 6,0  | 8,0  | 8,0  | 6,5  |
| DOLOR 6h  | N                 | 80   | 34   | 46   | 40   | 14   | 26   | 40   | 20   |
|           | Media             | 2,1  | 2,0  | 2,2  | 2,2  | 1,7  | 2,5  | 2,0  | 2,2  |
|           | Desviación típica | 2,4  | 2,7  | 2,2  | 2,6  | 2,6  | 2,6  | 2,3  | 2,8  |
|           | Mínimo            | 0,0  | 0,0  | 0,0  | 0,0  | 0,0  | 0,0  | 0,0  | 0,0  |
|           | Máximo            | 9,0  | 9,0  | 8,0  | 9,0  | 9,0  | 8,0  | 9,0  | 9,0  |
|           | Percentil 25      | 0,0  | 0,0  | 0,0  | 0,0  | 0,0  | 0,0  | 0,0  | 0,0  |
|           | Mediana           | 2,0  | 1,0  | 2,0  | 2,0  | 0,0  | 2,0  | 1,0  | 1,0  |
| DOLOR 24h | Percentil 75      | 3,0  | 3,0  | 3,0  | 3,5  | 3,0  | 4,0  | 3,0  | 3,5  |
|           | N                 | 80   | 34   | 46   | 40   | 14   | 26   | 40   | 20   |
|           | Media             | 1,5  | 1,6  | 1,4  | 1,8  | 2,1  | 1,6  | 1,3  | 1,3  |
|           | Desviación típica | 2,1  | 2,5  | 1,8  | 2,3  | 2,8  | 1,9  | 2,0  | 2,3  |
|           | Mínimo            | 0,0  | 0,0  | 0,0  | 0,0  | 0,0  | 0,0  | 0,0  | 0,0  |
|           | Máximo            | 9,0  | 9,0  | 8,0  | 9,0  | 9,0  | 8,0  | 7,0  | 7,0  |
|           | Percentil 25      | 0,0  | 0,0  | 0,0  | 0,0  | 0,0  | 0,0  | 0,0  | 0,0  |
| DOLOR 3d  | Mediana           | 1,0  | 0,0  | 1,0  | 1,0  | 1,0  | 1,0  | 0,0  | 0,0  |
|           | Percentil 75      | 2,0  | 2,0  | 2,0  | 2,5  | 3,0  | 2,0  | 1,5  | 1,5  |
|           | N                 | 80   | 34   | 46   | 40   | 14   | 26   | 40   | 20   |
|           | Media             | 1,3  | 1,1  | 1,4  | 1,3  | 0,8  | 1,5  | 1,3  | 1,3  |
|           | Desviación típica | 2,0  | 2,0  | 2,1  | 2,1  | 1,3  | 2,4  | 2,0  | 2,4  |
|           | Mínimo            | 0,0  | 0,0  | 0,0  | 0,0  | 0,0  | 0,0  | 0,0  | 0,0  |
|           | Máximo            | 10,0 | 10,0 | 10,0 | 10,0 | 4,0  | 10,0 | 10,0 | 10,0 |
|           | Percentil 25      | 0,0  | 0,0  | 0,0  | 0,0  | 0,0  | 0,0  | 0,0  | 0,0  |
|           | Mediana           | 0,0  | 0,0  | 0,5  | 0,0  | 0,0  | 0,0  | 0,5  | 0,0  |
|           | Percentil 75      | 2,0  | 1,0  | 2,0  | 2,0  | 1,0  | 2,0  | 2,0  | 1,5  |
|           |                   |      |      |      |      |      |      |      |      |

T32b- REDUCCIÓN DOLOR (VAS) 3d - PRE según GRUPO y MOLESTIA MASTICAR pre

GRUPO

|                  |                   | Total                 |                |         | PEC                   |                |         | POT                   |                |
|------------------|-------------------|-----------------------|----------------|---------|-----------------------|----------------|---------|-----------------------|----------------|
|                  |                   | MOLESTIA MASTICAR PRE |                |         | MOLESTIA MASTICAR PRE |                |         | MOLESTIA MASTICAR PRE |                |
|                  |                   | Total                 | Hasta moderada | Intensa | Total                 | Hasta moderada | Intensa | Total                 | Hasta moderada |
| DIF.DOLOR.3d_PRE | N                 | 80                    | 34             | 46      | 40                    | 14             | 26      | 40                    | 20             |
|                  | Media             | -4,5                  | -3,5           | -5,3    | -4,7                  | -3,9           | -5,2    | -4,3                  | -3,2           |
|                  | Desviación típica | 3,5                   | 3,7            | 3,1     | 3,2                   | 3,1            | 3,2     | 3,8                   | 4,1            |
|                  | Mínimo            | -9,0                  | -9,0           | -9,0    | -9,0                  | -9,0           | -9,0    | -9,0                  | -8,0           |
|                  | Máximo            | 6,0                   | 6,0            | 4,0     | 4,0                   | 1,0            | 4,0     | 6,0                   | 6,0            |
|                  | Percentil 25      | -7,0                  | -6,0           | -8,0    | -7,0                  | -6,0           | -8,0    | -7,0                  | -6,0           |
|                  | Mediana           | -6,0                  | -5,0           | -6,0    | -6,0                  | -4,5           | -6,0    | -5,0                  | -5,0           |
|                  | Percentil 75      | -1,5                  | -1,0           | -4,0    | -1,5                  | -1,0           | -4,0    | -1,5                  | -0,5           |

**T32c.- TIEMPO HASTA NO DOLOR / DOLOR LEVE según GRUPO y MOLESTIA MASTICAR pre**

|                                    |               | Total                 |         |                |         |         |         |       |         |
|------------------------------------|---------------|-----------------------|---------|----------------|---------|---------|---------|-------|---------|
|                                    |               | MOLESTIA MASTICAR PRE |         |                |         |         |         |       |         |
|                                    |               | Total                 |         | Hasta moderada |         | Intensa |         | Total |         |
|                                    |               | N                     | %       | N              | %       | N       | %       | N     | %       |
| TIEMPO HASTA NO DOLOR DEFINITIVO   | Total         | 80                    | 100,0 % | 34             | 100,0 % | 46      | 100,0 % | 40    | 100,0 % |
|                                    | Pre           | 2                     | 2,5 %   | 0              | 0,0 %   | 2       | 4,3 %   | 1     | 2,5 %   |
|                                    | 6h            | 20                    | 25,0 %  | 11             | 32,4 %  | 9       | 19,6 %  | 10    | 25,0 %  |
|                                    | 24h           | 7                     | 8,8 %   | 3              | 8,8 %   | 4       | 8,7 %   | 2     | 5,0 %   |
|                                    | 3d            | 12                    | 15,0 %  | 5              | 14,7 %  | 7       | 15,2 %  | 9     | 22,5 %  |
|                                    | No se alcanza | 39                    | 48,8 %  | 15             | 44,1 %  | 24      | 52,2 %  | 18    | 45,0 %  |
| TIEMPO HASTA DOLOR LEVE DEFINITIVO | Total         | 80                    | 100,0 % | 34             | 100,0 % | 46      | 100,0 % | 40    | 100,0 % |
|                                    | Pre           | 4                     | 5,0 %   | 0              | 0,0 %   | 4       | 8,7 %   | 2     | 5,0 %   |
|                                    | 6h            | 53                    | 66,3 %  | 24             | 70,6 %  | 29      | 63,0 %  | 24    | 60,0 %  |
|                                    | 24h           | 7                     | 8,8 %   | 3              | 8,8 %   | 4       | 8,7 %   | 5     | 12,5 %  |
|                                    | 3d            | 7                     | 8,8 %   | 4              | 11,8 %  | 3       | 6,5 %   | 4     | 10,0 %  |
|                                    | No se alcanza | 9                     | 11,3 %  | 3              | 8,8 %   | 6       | 13,0 %  | 5     | 12,5 %  |

**T33- EVALUACIÓN SATISFACCIÓN GENERAL TRATAMIENTO (0-nada satisfecho a 10-muy satisfecho) según GRUPO y MOLESTIA MASTICAR pre**

|              |                   | GRUPO                 |                |         |                       |                |         |                       |                |
|--------------|-------------------|-----------------------|----------------|---------|-----------------------|----------------|---------|-----------------------|----------------|
|              |                   | Total                 |                |         | PEC                   |                |         | POT                   |                |
|              |                   | MOLESTIA MASTICAR PRE |                |         | MOLESTIA MASTICAR PRE |                |         | MOLESTIA MASTICAR PRE |                |
|              |                   | Total                 | Hasta moderada | Intensa | Total                 | Hasta moderada | Intensa | Total                 | Hasta moderada |
| SATISFACCION | N                 | 80                    | 34             | 46      | 40                    | 14             | 26      | 40                    | 20             |
|              | Media             | 9,1                   | 9,6            | 8,7     | 9,2                   | 9,6            | 9,0     | 9,1                   | 9,7            |
|              | Desviación típica | 1,8                   | 0,8            | 2,2     | 1,7                   | 0,7            | 2,0     | 2,0                   | 0,9            |
|              | Mínimo            | 1,0                   | 7,0            | 1,0     | 1,0                   | 8,0            | 1,0     | 1,0                   | 7,0            |
|              | Máximo            | 10,0                  | 10,0           | 10,0    | 10,0                  | 10,0           | 10,0    | 10,0                  | 10,0           |
|              | Percentil 25      | 9,0                   | 10,0           | 8,0     | 9,0                   | 10,0           | 9,0     | 9,0                   | 10,0           |
|              | Mediana           | 10,0                  | 10,0           | 10,0    | 10,0                  | 10,0           | 10,0    | 10,0                  | 10,0           |
|              | Percentil 75      | 10,0                  | 10,0           | 10,0    | 10,0                  | 10,0           | 10,0    | 10,0                  | 10,0           |

**T34.- DOLOR AL MASTICAR POST-OPERATORIO según GRUPO y MOLESTIA MASTICAR pre**

|       |  | GRUPO                 |                |         |                       |                |         |                       |                |
|-------|--|-----------------------|----------------|---------|-----------------------|----------------|---------|-----------------------|----------------|
|       |  | Total                 |                |         | PEC                   |                |         | POT                   |                |
|       |  | MOLESTIA MASTICAR PRE |                |         | MOLESTIA MASTICAR PRE |                |         | MOLESTIA MASTICAR PRE |                |
|       |  | Total                 | Hasta moderada | Intensa | Total                 | Hasta moderada | Intensa | Total                 | Hasta moderada |
|       |  | N                     | %              | N       | %                     | N              | %       | N                     | %              |
| Total |  | 80                    | 100,0 %        | 34      | 100,0 %               | 46             | 100,0 % | 40                    | 100,0 %        |
| No    |  | 68                    | 85,0 %         | 27      | 79,4 %                | 41             | 89,1 %  | 36                    | 90,0 %         |
| Sí    |  | 12                    | 15,0 %         | 7       | 20,6 %                | 5              | 10,9 %  | 4                     | 10,0 %         |

**T35.- GRADO MOLESTIAS AL MASTICAR PRE según GRUPO y PAA**

|   |  | GRUPO |    |    |       |    |    |       |    |
|---|--|-------|----|----|-------|----|----|-------|----|
|   |  | Total |    |    | PEC   |    |    | POT   |    |
|   |  | PAA   |    |    | PAA   |    |    | PAA   |    |
|   |  | Total | No | Sí | Total | No | Sí | Total | Sí |
| N |  | 80    | 47 | 33 | 40    | 20 | 20 | 40    | 13 |

|                   |      |      |      |      |      |      |      |      |      |
|-------------------|------|------|------|------|------|------|------|------|------|
| Media             | 6,5  | 5,3  | 8,2  | 7,2  | 6,2  | 8,2  | 5,8  | 4,6  | 8,4  |
| Desviación típica | 3,3  | 3,4  | 2,0  | 2,7  | 2,8  | 2,2  | 3,6  | 3,7  | 1,8  |
| Mínimo            | 0,0  | 0,0  | 2,0  | 0,0  | 0,0  | 2,0  | 0,0  | 0,0  | 4,0  |
| Máximo            | 10,0 | 10,0 | 10,0 | 10,0 | 10,0 | 10,0 | 10,0 | 10,0 | 10,0 |
| Percentil 25      | 4,0  | 3,0  | 7,0  | 5,0  | 4,0  | 7,0  | 3,0  | 1,0  | 7,0  |
| Mediana           | 7,0  | 5,0  | 9,0  | 8,0  | 6,5  | 9,0  | 6,5  | 4,0  | 9,0  |
| Percentil 75      | 9,0  | 8,0  | 10,0 | 9,0  | 8,5  | 10,0 | 9,5  | 8,0  | 10,0 |
|                   |      |      |      |      |      |      |      |      |      |

### T36.- GRADO NERVIOSISMO PRE según GRUPO y EXPERIENCIA PREVIA

|                   | GRUPO       |     |      |     |             |     |      |     |       |
|-------------------|-------------|-----|------|-----|-------------|-----|------|-----|-------|
|                   | Total       |     |      |     | PEC         |     |      |     |       |
|                   | EXPERIENCIA |     |      |     | EXPERIENCIA |     |      |     |       |
|                   | Total       | No  | Sí   | NS  | Total       | No  | Sí   | NS  | Total |
| N                 | 80          | 23  | 50   | 7   | 40          | 14  | 24   | 2   | 40    |
| Media             | 3,2         | 2,7 | 3,3  | 4,7 | 3,2         | 2,9 | 3,4  | 2,5 | 3,3   |
| Desviación típica | 3,4         | 2,9 | 3,6  | 3,5 | 3,2         | 2,8 | 3,6  | 3,5 | 3,5   |
| Mínimo            | 0,0         | 0,0 | 0,0  | 0,0 | 0,0         | 0,0 | 0,0  | 0,0 | 0,0   |
| Máximo            | 10,0        | 7,0 | 10,0 | 9,0 | 10,0        | 7,0 | 10,0 | 5,0 | 10,0  |
| Percentil 25      | 0,0         | 0,0 | 0,0  | 0,0 | 0,0         | 0,0 | 0,0  | 0,0 | 0,0   |
| Mediana           | 2,0         | 2,0 | 1,5  | 5,0 | 2,0         | 3,0 | 2,0  | 2,5 | 2,5   |
| Percentil 75      | 6,0         | 6,0 | 6,0  | 8,0 | 5,5         | 5,0 | 6,0  | 5,0 | 6,0   |
|                   |             |     |      |     |             |     |      |     |       |

### T37- EVALUACIÓN INCOMODIDAD TRATAMIENTO (0-ninguna a 10-muy desagradable) según GRUPO y EXPERIENCIA PREVIA

|                   | GRUPO       |     |     |     |             |     |     |     |
|-------------------|-------------|-----|-----|-----|-------------|-----|-----|-----|
|                   | Total       |     |     |     | PEC         |     |     |     |
|                   | EXPERIENCIA |     |     |     | EXPERIENCIA |     |     |     |
|                   | Total       | No  | Sí  | NS  | Total       | No  | Sí  | NS  |
| N                 | 80          | 23  | 50  | 7   | 40          | 14  | 24  | 2   |
| Media             | 1,6         | 1,7 | 1,5 | 1,3 | 1,5         | 1,5 | 1,4 | 3,0 |
| Desviación típica | 1,9         | 2,3 | 1,8 | 1,3 | 2,0         | 2,3 | 1,9 | 0,0 |
| Mínimo            | 0,0         | 0,0 | 0,0 | 0,0 | 0,0         | 0,0 | 0,0 | 3,0 |

INCOMODIDAD

|              |     |     |     |     |     |     |     |     |
|--------------|-----|-----|-----|-----|-----|-----|-----|-----|
| Máximo       | 7,0 | 7,0 | 5,0 | 3,0 | 7,0 | 7,0 | 5,0 | 3,0 |
| Percentil 25 | 0,0 | 0,0 | 0,0 | 0,0 | 0,0 | 0,0 | 0,0 | 3,0 |
| Mediana      | 1,0 | 1,0 | 1,0 | 1,0 | 0,0 | 0,5 | 0,0 | 3,0 |
| Percentil 75 | 3,0 | 3,0 | 3,0 | 3,0 | 3,0 | 2,0 | 2,5 | 3,0 |
|              |     |     |     |     |     |     |     |     |

**T38- EVALUACIÓN SATISFACCIÓN GENERAL TRATAMIENTO (0-nada satisfecho a 10-muy satisfecho) según GRUPO y EXPERIENCIA PREVIA**

|              |                   | GRUPO       |      |      |      |             |      |      |      |
|--------------|-------------------|-------------|------|------|------|-------------|------|------|------|
|              |                   | Total       |      |      |      | PEC         |      |      |      |
|              |                   | EXPERIENCIA |      |      |      | EXPERIENCIA |      |      |      |
|              |                   | Total       | No   | Sí   | NS   | Total       | No   | Sí   | NS   |
| SATISFACCION | N                 | 80          | 23   | 50   | 7    | 40          | 14   | 24   | 2    |
|              | Media             | 9,1         | 9,1  | 9,0  | 10,0 | 9,2         | 9,1  | 9,2  | 10,0 |
|              | Desviación típica | 1,8         | 2,1  | 1,8  | 0,0  | 1,7         | 1,4  | 1,9  | 0,0  |
|              | Mínimo            | 1,0         | 1,0  | 1,0  | 10,0 | 1,0         | 5,0  | 1,0  | 10,0 |
|              | Máximo            | 10,0        | 10,0 | 10,0 | 10,0 | 10,0        | 10,0 | 10,0 | 10,0 |
|              | Percentil 25      | 9,0         | 9,0  | 8,0  | 10,0 | 9,0         | 9,0  | 9,0  | 10,0 |
|              | Mediana           | 10,0        | 10,0 | 10,0 | 10,0 | 10,0        | 10,0 | 10,0 | 10,0 |
|              | Percentil 75      | 10,0        | 10,0 | 10,0 | 10,0 | 10,0        | 10,0 | 10,0 | 10,0 |
|              |                   |             |      |      |      |             |      |      |      |

**T39- TIEMPO ANESTESIA A APERTURA (minutos) según GRUPO y TIPO ANESTESIA**

|                   |      | GRUPO     |              |           |           |              |           |           |              |           |
|-------------------|------|-----------|--------------|-----------|-----------|--------------|-----------|-----------|--------------|-----------|
|                   |      | Total     |              |           | PEC       |              |           | POT       |              |           |
|                   |      | ANESTESIA |              |           | ANESTESIA |              |           | ANESTESIA |              |           |
|                   |      | Total     | Infiltrativa | Troncular | Total     | Infiltrativa | Troncular | Total     | Infiltrativa | Troncular |
| N                 | 79   | 44        | 35           | 39        | 22        | 17           | 40        | 22        | 18           |           |
| Media             | 16,6 | 15,4      | 18,1         | 19,2      | 18,2      | 20,4         | 14,2      | 12,7      | 16,0         |           |
| Desviación típica | 10,6 | 10,6      | 10,6         | 11,6      | 12,9      | 10,0         | 9,0       | 6,9       | 11,0         |           |
| Mínimo            | 3,0  | 5,0       | 3,0          | 6,0       | 6,0       | 8,0          | 3,0       | 5,0       | 3,0          |           |
| Máximo            | 63,0 | 63,0      | 50,0         | 63,0      | 63,0      | 47,0         | 50,0      | 30,0      | 50,0         |           |
| Percentil 25      | 10,0 | 9,5       | 12,0         | 12,0      | 12,0      | 15,0         | 8,5       | 8,0       | 9,0          |           |
| Mediana           | 14,0 | 12,0      | 15,0         | 15,0      | 13,0      | 18,0         | 11,5      | 10,5      | 14,5         |           |



|              |      |      |      |      |      |      |      |      |      |
|--------------|------|------|------|------|------|------|------|------|------|
| Percentil 75 | 20,0 | 17,0 | 20,0 | 22,0 | 20,0 | 23,0 | 19,0 | 14,0 | 20,0 |
|              |      |      |      |      |      |      |      |      |      |

#### T40- EVOLUCIÓN DOLOR (VAS) según GRUPO y TIEMPO ANESTESIA-APERTURA

|           |                   | GRUPO                     |       |        |                           |       |        |                           |       |
|-----------|-------------------|---------------------------|-------|--------|---------------------------|-------|--------|---------------------------|-------|
|           |                   | Total                     |       |        | PEC                       |       |        | POT                       |       |
|           |                   | TIEMPO ANESTESIA-APERTURA |       |        | TIEMPO ANESTESIA-APERTURA |       |        | TIEMPO ANESTESIA-APERTURA |       |
|           |                   | Total                     | <15 m | >=15 m | Total                     | <15 m | >=15 m | Total                     | <15 m |
| DOLOR pre | N                 | 79                        | 42    | 37     | 39                        | 16    | 23     | 40                        | 26    |
|           | Media             | 5,8                       | 5,4   | 6,3    | 5,9                       | 5,3   | 6,4    | 5,6                       | 5,4   |
|           | Desviación típica | 2,8                       | 3,1   | 2,4    | 2,6                       | 3,0   | 2,3    | 3,1                       | 3,2   |
|           | Mínimo            | 0,0                       | 0,0   | 0,0    | 0,0                       | 0,0   | 1,0    | 0,0                       | 0,0   |
|           | Máximo            | 10,0                      | 10,0  | 10,0   | 10,0                      | 9,0   | 10,0   | 10,0                      | 10,0  |
|           | Percentil 25      | 4,0                       | 4,0   | 6,0    | 4,0                       | 3,5   | 6,0    | 4,0                       | 4,0   |
|           | Mediana           | 7,0                       | 6,0   | 7,0    | 7,0                       | 6,0   | 7,0    | 6,0                       | 5,5   |
|           | Percentil 75      | 8,0                       | 8,0   | 8,0    | 8,0                       | 8,0   | 8,0    | 8,0                       | 8,0   |
| DOLOR 6h  | N                 | 79                        | 42    | 37     | 39                        | 16    | 23     | 40                        | 26    |
|           | Media             | 2,1                       | 1,9   | 2,4    | 2,2                       | 1,8   | 2,6    | 2,0                       | 2,0   |
|           | Desviación típica | 2,4                       | 2,4   | 2,5    | 2,6                       | 2,7   | 2,6    | 2,3                       | 2,3   |
|           | Mínimo            | 0,0                       | 0,0   | 0,0    | 0,0                       | 0,0   | 0,0    | 0,0                       | 0,0   |
|           | Máximo            | 9,0                       | 8,0   | 9,0    | 9,0                       | 8,0   | 9,0    | 9,0                       | 7,0   |
|           | Percentil 25      | 0,0                       | 0,0   | 0,0    | 0,0                       | 0,0   | 0,0    | 0,0                       | 0,0   |
|           | Mediana           | 2,0                       | 1,0   | 2,0    | 2,0                       | 0,0   | 2,0    | 1,0                       | 1,0   |
|           | Percentil 75      | 3,0                       | 3,0   | 4,0    | 4,0                       | 2,5   | 4,0    | 3,0                       | 3,0   |
| DOLOR 24h | N                 | 79                        | 42    | 37     | 39                        | 16    | 23     | 40                        | 26    |
|           | Media             | 1,5                       | 1,1   | 2,0    | 1,7                       | 0,8   | 2,4    | 1,3                       | 1,2   |
|           | Desviación típica | 2,1                       | 1,7   | 2,5    | 2,3                       | 1,2   | 2,6    | 2,0                       | 1,9   |
|           | Mínimo            | 0,0                       | 0,0   | 0,0    | 0,0                       | 0,0   | 0,0    | 0,0                       | 0,0   |
|           | Máximo            | 9,0                       | 5,0   | 9,0    | 9,0                       | 4,0   | 9,0    | 7,0                       | 5,0   |
|           | Percentil 25      | 0,0                       | 0,0   | 0,0    | 0,0                       | 0,0   | 0,0    | 0,0                       | 0,0   |
|           | Mediana           | 1,0                       | 0,0   | 1,0    | 1,0                       | 0,0   | 2,0    | 0,0                       | 0,0   |
|           | Percentil 75      | 2,0                       | 1,0   | 3,0    | 3,0                       | 1,0   | 4,0    | 1,5                       | 2,0   |
|           | N                 | 79                        | 42    | 37     | 39                        | 16    | 23     | 40                        | 26    |

|          |                   |      |      |     |      |      |     |      |      |
|----------|-------------------|------|------|-----|------|------|-----|------|------|
| DOLOR 3d | Media             | 1,3  | 1,5  | 1,1 | 1,3  | 1,3  | 1,3 | 1,3  | 1,7  |
|          | Desviación típica | 2,0  | 2,4  | 1,6 | 2,1  | 2,6  | 1,7 | 2,0  | 2,2  |
|          | Mínimo            | 0,0  | 0,0  | 0,0 | 0,0  | 0,0  | 0,0 | 0,0  | 0,0  |
|          | Máximo            | 10,0 | 10,0 | 6,0 | 10,0 | 10,0 | 6,0 | 10,0 | 10,0 |
|          | Percentil 25      | 0,0  | 0,0  | 0,0 | 0,0  | 0,0  | 0,0 | 0,0  | 0,0  |
|          | Mediana           | 0,0  | 0,0  | 0,0 | 0,0  | 0,0  | 1,0 | 0,5  | 1,0  |
|          | Percentil 75      | 2,0  | 3,0  | 2,0 | 2,0  | 2,0  | 2,0 | 2,0  | 3,0  |
|          |                   |      |      |     |      |      |     |      |      |

#### T40b- REDUCCIÓN DOLOR (VAS) 3d - PRE según GRUPO y TIEMPO ANESTESIA-APERTURA

|                  |                   | GRUPO                     |       |        |                           |       |        |                           |       |
|------------------|-------------------|---------------------------|-------|--------|---------------------------|-------|--------|---------------------------|-------|
|                  |                   | Total                     |       |        | PEC                       |       |        | POT                       |       |
|                  |                   | TIEMPO ANESTESIA-APERTURA |       |        | TIEMPO ANESTESIA-APERTURA |       |        | TIEMPO ANESTESIA-APERTURA |       |
|                  |                   | Total                     | <15 m | >=15 m | Total                     | <15 m | >=15 m | Total                     | <15 m |
| DIF.DOLOR.3d_PRE | N                 | 79                        | 42    | 37     | 39                        | 16    | 23     | 40                        | 26    |
|                  | Media             | -4,5                      | -3,9  | -5,2   | -4,7                      | -4,0  | -5,1   | -4,3                      | -3,8  |
|                  | Desviación típica | 3,5                       | 3,9   | 2,9    | 3,2                       | 3,8   | 2,7    | 3,8                       | 4,0   |
|                  | Mínimo            | -9,0                      | -9,0  | -9,0   | -9,0                      | -8,0  | -9,0   | -9,0                      | -9,0  |
|                  | Máximo            | 6,0                       | 6,0   | 1,0    | 4,0                       | 4,0   | 1,0    | 6,0                       | 6,0   |
|                  | Percentil 25      | -7,0                      | -7,0  | -7,0   | -7,0                      | -7,5  | -7,0   | -7,0                      | -7,0  |
|                  | Mediana           | -6,0                      | -5,0  | -6,0   | -6,0                      | -5,0  | -6,0   | -5,0                      | -5,0  |
|                  | Percentil 75      | -1,0                      | -1,0  | -4,0   | -1,0                      | -1,0  | -3,0   | -1,5                      | -1,0  |
|                  |                   |                           |       |        |                           |       |        |                           |       |

#### T40c.- TIEMPO HASTA NO DOLOR / DOLOR LEVE según GRUPO y TIEMPO ANESTESIA-APERTURA

|                 |       | Total                     |         |       |         |        |         |       |         |
|-----------------|-------|---------------------------|---------|-------|---------|--------|---------|-------|---------|
|                 |       | TIEMPO ANESTESIA-APERTURA |         |       |         |        |         |       |         |
|                 |       | Total                     |         | <15 m |         | >=15 m |         | Total |         |
|                 |       | N                         | %       | N     | %       | N      | %       | N     | %       |
| TIEMPO HASTA NO | Total | 79                        | 100,0 % | 42    | 100,0 % | 37     | 100,0 % | 39    | 100,0 % |
|                 | Pre   | 2                         | 2,5 %   | 2     | 4,8 %   | 0      | 0,0 %   | 1     | 2,6 %   |
|                 | 6h    | 20                        | 25,3 %  | 14    | 33,3 %  | 6      | 16,2 %  | 10    | 25,6 %  |

|                                    |               |    |         |    |         |    |         |    |         |
|------------------------------------|---------------|----|---------|----|---------|----|---------|----|---------|
| DOLOR DEFINITIVO                   | 24h           | 7  | 8,9 %   | 2  | 4,8 %   | 5  | 13,5 %  | 2  | 5,1 %   |
|                                    | 3d            | 11 | 13,9 %  | 3  | 7,1 %   | 8  | 21,6 %  | 8  | 20,5 %  |
|                                    | No se alcanza | 39 | 49,4 %  | 21 | 50,0 %  | 18 | 48,6 %  | 18 | 46,2 %  |
| TIEMPO HASTA DOLOR LEVE DEFINITIVO | Total         | 79 | 100,0 % | 42 | 100,0 % | 37 | 100,0 % | 39 | 100,0 % |
|                                    | Pre           | 4  | 5,1 %   | 2  | 4,8 %   | 2  | 5,4 %   | 2  | 5,1 %   |
|                                    | 6h            | 52 | 65,8 %  | 29 | 69,0 %  | 23 | 62,2 %  | 23 | 59,0 %  |
|                                    | 24h           | 7  | 8,9 %   | 3  | 7,1 %   | 4  | 10,8 %  | 5  | 12,8 %  |
|                                    | 3d            | 7  | 8,9 %   | 3  | 7,1 %   | 4  | 10,8 %  | 4  | 10,3 %  |
|                                    | No se alcanza | 9  | 11,4 %  | 5  | 11,9 %  | 4  | 10,8 %  | 5  | 12,8 %  |

#### T41- EVALUACIÓN DURACIÓN TRATAMIENTO (0-muy corto a 10-demasiado largo) según GRUPO y TIEMPO ANESTESIA-APERTURA

|          |                   | GRUPO                     |       |        |                           |       |        |                           |       |
|----------|-------------------|---------------------------|-------|--------|---------------------------|-------|--------|---------------------------|-------|
|          |                   | Total                     |       |        | PEC                       |       |        | POT                       |       |
|          |                   | TIEMPO ANESTESIA-APERTURA |       |        | TIEMPO ANESTESIA-APERTURA |       |        | TIEMPO ANESTESIA-APERTURA |       |
|          |                   | Total                     | <15 m | >=15 m | Total                     | <15 m | >=15 m | Total                     | <15 m |
| DURACION | N                 | 79                        | 42    | 37     | 39                        | 16    | 23     | 40                        | 26    |
|          | Media             | 2,5                       | 2,6   | 2,4    | 3,1                       | 3,2   | 3,0    | 2,0                       | 2,3   |
|          | Desviación típica | 1,8                       | 1,9   | 1,7    | 1,9                       | 2,1   | 1,8    | 1,6                       | 1,7   |
|          | Mínimo            | 0,0                       | 0,0   | 0,0    | 0,0                       | 1,0   | 0,0    | 0,0                       | 0,0   |
|          | Máximo            | 10,0                      | 10,0  | 7,0    | 10,0                      | 10,0  | 7,0    | 5,0                       | 5,0   |
|          | Percentil 25      | 1,0                       | 2,0   | 1,0    | 2,0                       | 2,0   | 2,0    | 0,0                       | 0,0   |
|          | Mediana           | 3,0                       | 3,0   | 3,0    | 3,0                       | 3,0   | 3,0    | 3,0                       | 3,0   |
|          | Percentil 75      | 3,0                       | 3,0   | 3,0    | 3,0                       | 3,0   | 4,0    | 3,0                       | 3,0   |

#### T42- EVALUACIÓN INCOMODIDAD TRATAMIENTO (0-muy corto a 10-demasiado largo) según GRUPO y TIEMPO ANESTESIA-APERTURA

|  |       | GRUPO                     |       |        |                           |       |        |                           |       |
|--|-------|---------------------------|-------|--------|---------------------------|-------|--------|---------------------------|-------|
|  |       | Total                     |       |        | PEC                       |       |        | POT                       |       |
|  |       | TIEMPO ANESTESIA-APERTURA |       |        | TIEMPO ANESTESIA-APERTURA |       |        | TIEMPO ANESTESIA-APERTURA |       |
|  |       | Total                     | <15 m | >=15 m | Total                     | <15 m | >=15 m | Total                     | <15 m |
|  | N     | 79                        | 42    | 37     | 39                        | 16    | 23     | 40                        | 26    |
|  | Media | 1,5                       | 1,4   | 1,7    | 1,5                       | 1,6   | 1,4    | 1,6                       | 1,3   |

|             |                   |     |     |     |     |     |     |     |     |
|-------------|-------------------|-----|-----|-----|-----|-----|-----|-----|-----|
| INCOMODIDAD | Desviación típica | 1,9 | 1,9 | 2,0 | 2,0 | 2,3 | 1,9 | 1,8 | 1,5 |
|             | Mínimo            | 0,0 | 0,0 | 0,0 | 0,0 | 0,0 | 0,0 | 0,0 | 0,0 |
|             | Máximo            | 7,0 | 7,0 | 6,0 | 7,0 | 7,0 | 5,0 | 6,0 | 5,0 |
|             | Percentil 25      | 0,0 | 0,0 | 0,0 | 0,0 | 0,0 | 0,0 | 0,0 | 0,0 |
|             | Mediana           | 1,0 | 1,0 | 1,0 | 0,0 | 0,5 | 0,0 | 1,0 | 1,0 |
|             | Percentil 75      | 3,0 | 2,0 | 3,0 | 3,0 | 2,0 | 3,0 | 3,0 | 2,0 |
|             |                   |     |     |     |     |     |     |     |     |

#### T43- EVALUACIÓN SATISFACCIÓN GENERAL TRATAMIENTO (0-nada satisfecho a 10-muy satisfecho) según GRUPO y TIEMPO ANESTESIA-APERTURA

|              |                   | GRUPO                     |       |        |                           |       |        |                           |       |
|--------------|-------------------|---------------------------|-------|--------|---------------------------|-------|--------|---------------------------|-------|
|              |                   | Total                     |       |        | PEC                       |       |        | POT                       |       |
|              |                   | TIEMPO ANESTESIA-APERTURA |       |        | TIEMPO ANESTESIA-APERTURA |       |        | TIEMPO ANESTESIA-APERTURA |       |
|              |                   | Total                     | <15 m | >=15 m | Total                     | <15 m | >=15 m | Total                     | <15 m |
| SATISFACCION | N                 | 79                        | 42    | 37     | 39                        | 16    | 23     | 40                        | 26    |
|              | Media             | 9,1                       | 9,2   | 9,0    | 9,2                       | 9,0   | 9,3    | 9,1                       | 9,3   |
|              | Desviación típica | 1,8                       | 1,7   | 2,0    | 1,7                       | 2,3   | 1,2    | 2,0                       | 1,3   |
|              | Mínimo            | 1,0                       | 1,0   | 1,0    | 1,0                       | 1,0   | 5,0    | 1,0                       | 6,0   |
|              | Máximo            | 10,0                      | 10,0  | 10,0   | 10,0                      | 10,0  | 10,0   | 10,0                      | 10,0  |
|              | Percentil 25      | 9,0                       | 9,0   | 9,0    | 9,0                       | 8,5   | 9,0    | 9,0                       | 9,0   |
|              | Mediana           | 10,0                      | 10,0  | 10,0   | 10,0                      | 10,0  | 10,0   | 10,0                      | 10,0  |
|              | Percentil 75      | 10,0                      | 10,0  | 10,0   | 10,0                      | 10,0  | 10,0   | 10,0                      | 10,0  |
|              |                   |                           |       |        |                           |       |        |                           |       |

#### T44- EVOLUCIÓN DOLOR (VAS) según GRUPO y TIEMPO APERTURA-FINAL

|           |                   | GRUPO                 |       |      |                       |       |      |                       |       |
|-----------|-------------------|-----------------------|-------|------|-----------------------|-------|------|-----------------------|-------|
|           |                   | Total                 |       |      | PEC                   |       |      | POT                   |       |
|           |                   | TIEMPO APERTURA-FINAL |       |      | TIEMPO APERTURA-FINAL |       |      | TIEMPO APERTURA-FINAL |       |
|           |                   | Total                 | <=8 m | >8 m | Total                 | <=8 m | >8 m | Total                 | <=8 m |
| DOLOR pre | N                 | 79                    | 41    | 38   | 39                    | 10    | 29   | 40                    | 31    |
|           | Media             | 5,8                   | 6,2   | 5,4  | 5,9                   | 6,7   | 5,7  | 5,6                   | 6,0   |
|           | Desviación típica | 2,8                   | 2,5   | 3,1  | 2,6                   | 1,6   | 2,9  | 3,1                   | 2,8   |
|           | Mínimo            | 0,0                   | 0,0   | 0,0  | 0,0                   | 4,0   | 0,0  | 0,0                   | 0,0   |
|           | Máximo            | 10,0                  | 10,0  | 10,0 | 10,0                  | 8,0   | 10,0 | 10,0                  | 10,0  |

|           |                   |      |     |      |      |     |      |      |     |
|-----------|-------------------|------|-----|------|------|-----|------|------|-----|
| DOLOR 6h  | Percentil 25      | 4,0  | 5,0 | 3,0  | 4,0  | 6,0 | 3,0  | 4,0  | 5,0 |
|           | Mediana           | 7,0  | 7,0 | 6,0  | 7,0  | 7,0 | 6,0  | 6,0  | 6,0 |
|           | Percentil 75      | 8,0  | 8,0 | 8,0  | 8,0  | 8,0 | 8,0  | 8,0  | 8,0 |
|           | N                 | 79   | 41  | 38   | 39   | 10  | 29   | 40   | 31  |
|           | Media             | 2,1  | 2,0 | 2,3  | 2,2  | 2,8 | 2,0  | 2,0  | 1,7 |
|           | Desviación típica | 2,4  | 2,4 | 2,5  | 2,6  | 3,0 | 2,5  | 2,3  | 2,1 |
|           | Mínimo            | 0,0  | 0,0 | 0,0  | 0,0  | 0,0 | 0,0  | 0,0  | 0,0 |
|           | Máximo            | 9,0  | 9,0 | 9,0  | 9,0  | 8,0 | 9,0  | 9,0  | 9,0 |
|           | Percentil 25      | 0,0  | 0,0 | 0,0  | 0,0  | 0,0 | 0,0  | 0,0  | 0,0 |
|           | Mediana           | 2,0  | 1,0 | 2,0  | 2,0  | 2,0 | 1,0  | 1,0  | 1,0 |
| DOLOR 24h | Percentil 75      | 3,0  | 3,0 | 4,0  | 4,0  | 3,0 | 4,0  | 3,0  | 3,0 |
|           | N                 | 79   | 41  | 38   | 39   | 10  | 29   | 40   | 31  |
|           | Media             | 1,5  | 0,9 | 2,1  | 1,7  | 1,1 | 2,0  | 1,3  | 0,9 |
|           | Desviación típica | 2,1  | 1,9 | 2,2  | 2,3  | 2,5 | 2,2  | 2,0  | 1,7 |
|           | Mínimo            | 0,0  | 0,0 | 0,0  | 0,0  | 0,0 | 0,0  | 0,0  | 0,0 |
|           | Máximo            | 9,0  | 8,0 | 9,0  | 9,0  | 8,0 | 9,0  | 7,0  | 7,0 |
|           | Percentil 25      | 0,0  | 0,0 | 0,0  | 0,0  | 0,0 | 0,0  | 0,0  | 0,0 |
|           | Mediana           | 1,0  | 0,0 | 1,5  | 1,0  | 0,0 | 2,0  | 0,0  | 0,0 |
|           | Percentil 75      | 2,0  | 1,0 | 4,0  | 3,0  | 1,0 | 3,0  | 1,5  | 1,0 |
|           | N                 | 79   | 41  | 38   | 39   | 10  | 29   | 40   | 31  |
| DOLOR 3d  | Media             | 1,3  | 1,0 | 1,6  | 1,3  | 1,2 | 1,3  | 1,3  | 1,0 |
|           | Desviación típica | 2,0  | 1,4 | 2,5  | 2,1  | 1,7 | 2,3  | 2,0  | 1,4 |
|           | Mínimo            | 0,0  | 0,0 | 0,0  | 0,0  | 0,0 | 0,0  | 0,0  | 0,0 |
|           | Máximo            | 10,0 | 5,0 | 10,0 | 10,0 | 5,0 | 10,0 | 10,0 | 5,0 |
|           | Percentil 25      | 0,0  | 0,0 | 0,0  | 0,0  | 0,0 | 0,0  | 0,0  | 0,0 |
|           | Mediana           | 0,0  | 0,0 | 0,5  | 0,0  | 0,5 | 0,0  | 0,5  | 0,0 |
|           | Percentil 75      | 2,0  | 2,0 | 2,0  | 2,0  | 2,0 | 2,0  | 2,0  | 2,0 |
|           |                   |      |     |      |      |     |      |      |     |
|           |                   |      |     |      |      |     |      |      |     |
|           |                   |      |     |      |      |     |      |      |     |

#### T44b- REDUCCIÓN DOLOR (VAS) 3d - PRE según GRUPO y TIEMPO APERTURA-FINAL

|  | GRUPO                 |                       |                       |
|--|-----------------------|-----------------------|-----------------------|
|  | Total                 | PEC                   | POT                   |
|  | TIEMPO APERTURA-FINAL | TIEMPO APERTURA-FINAL | TIEMPO APERTURA-FINAL |

|                  |                   | Total | <=8 m | >8 m | Total | <=8 m | >8 m | Total | <=8 m |
|------------------|-------------------|-------|-------|------|-------|-------|------|-------|-------|
| DIF.DOLOR.3d_PRE | N                 | 79    | 41    | 38   | 39    | 10    | 29   | 40    | 31    |
|                  | Media             | -4,5  | -5,1  | -3,8 | -4,7  | -5,5  | -4,4 | -4,3  | -5,0  |
|                  | Desviación típica | 3,5   | 2,9   | 4,0  | 3,2   | 2,5   | 3,4  | 3,8   | 3,0   |
|                  | Mínimo            | -9,0  | -9,0  | -9,0 | -9,0  | -8,0  | -9,0 | -9,0  | -9,0  |
|                  | Máximo            | 6,0   | 3,0   | 6,0  | 4,0   | -1,0  | 4,0  | 6,0   | 3,0   |
|                  | Percentil 25      | -7,0  | -7,0  | -7,0 | -7,0  | -8,0  | -7,0 | -7,0  | -7,0  |
|                  | Mediana           | -6,0  | -6,0  | -5,5 | -6,0  | -6,0  | -6,0 | -5,0  | -6,0  |
|                  | Percentil 75      | -1,0  | -4,0  | -1,0 | -1,0  | -4,0  | -1,0 | -1,5  | -3,0  |
|                  |                   |       |       |      |       |       |      |       |       |

#### T44c.- TIEMPO HASTA NO DOLOR / DOLOR LEVE según GRUPO y TIEMPO APERTURA-FINAL

|                                    |               | Total                 |         |       |         |      |         |       |         |
|------------------------------------|---------------|-----------------------|---------|-------|---------|------|---------|-------|---------|
|                                    |               | TIEMPO APERTURA-FINAL |         |       |         |      |         |       |         |
|                                    |               | Total                 |         | <=8 m |         | >8 m |         | Total |         |
|                                    |               | N                     | %       | N     | %       | N    | %       | N     | %       |
| TIEMPO HASTA NO DOLOR DEFINITIVO   | Total         | 79                    | 100,0 % | 41    | 100,0 % | 38   | 100,0 % | 39    | 100,0 % |
|                                    | Pre           | 2                     | 2,5 %   | 0     | 0,0 %   | 2    | 5,3 %   | 1     | 2,6 %   |
|                                    | 6h            | 20                    | 25,3 %  | 13    | 31,7 %  | 7    | 18,4 %  | 10    | 25,6 %  |
|                                    | 24h           | 7                     | 8,9 %   | 5     | 12,2 %  | 2    | 5,3 %   | 2     | 5,1 %   |
|                                    | 3d            | 11                    | 13,9 %  | 4     | 9,8 %   | 7    | 18,4 %  | 8     | 20,5 %  |
|                                    | No se alcanza | 39                    | 49,4 %  | 19    | 46,3 %  | 20   | 52,6 %  | 18    | 46,2 %  |
|                                    |               |                       |         |       |         |      |         |       |         |
| TIEMPO HASTA DOLOR LEVE DEFINITIVO | Total         | 79                    | 100,0 % | 41    | 100,0 % | 38   | 100,0 % | 39    | 100,0 % |
|                                    | Pre           | 4                     | 5,1 %   | 1     | 2,4 %   | 3    | 7,9 %   | 2     | 5,1 %   |
|                                    | 6h            | 52                    | 65,8 %  | 33    | 80,5 %  | 19   | 50,0 %  | 23    | 59,0 %  |
|                                    | 24h           | 7                     | 8,9 %   | 4     | 9,8 %   | 3    | 7,9 %   | 5     | 12,8 %  |
|                                    | 3d            | 7                     | 8,9 %   | 1     | 2,4 %   | 6    | 15,8 %  | 4     | 10,3 %  |
|                                    | No se alcanza | 9                     | 11,4 %  | 2     | 4,9 %   | 7    | 18,4 %  | 5     | 12,8 %  |
|                                    |               |                       |         |       |         |      |         |       |         |

#### T45- EVALUACIÓN DURACIÓN TRATAMIENTO (0-muy corto a 10-demasiado largo) según GRUPO y TIEMPO APERTURA-FINAL

|  |  | GRUPO |  |  |  |  |  |  |  |
|--|--|-------|--|--|--|--|--|--|--|
|--|--|-------|--|--|--|--|--|--|--|

|          |                   | Total                 |       |      | PEC                   |       |      | POT                   |       |
|----------|-------------------|-----------------------|-------|------|-----------------------|-------|------|-----------------------|-------|
|          |                   | TIEMPO APERTURA-FINAL |       |      | TIEMPO APERTURA-FINAL |       |      | TIEMPO APERTURA-FINAL |       |
|          |                   | Total                 | <=8 m | >8 m | Total                 | <=8 m | >8 m | Total                 | <=8 m |
| DURACION | N                 | 79                    | 41    | 38   | 39                    | 10    | 29   | 40                    | 31    |
|          | Media             | 2,5                   | 2,1   | 3,0  | 3,1                   | 2,7   | 3,2  | 2,0                   | 1,9   |
|          | Desviación típica | 1,8                   | 1,9   | 1,6  | 1,9                   | 2,9   | 1,4  | 1,6                   | 1,5   |
|          | Mínimo            | 0,0                   | 0,0   | 0,0  | 0,0                   | 0,0   | 0,0  | 0,0                   | 0,0   |
|          | Máximo            | 10,0                  | 10,0  | 7,0  | 10,0                  | 10,0  | 7,0  | 5,0                   | 5,0   |
|          | Percentil 25      | 1,0                   | 1,0   | 2,0  | 2,0                   | 1,0   | 3,0  | 0,0                   | 0,0   |
|          | Mediana           | 3,0                   | 2,0   | 3,0  | 3,0                   | 2,0   | 3,0  | 3,0                   | 2,0   |
|          | Percentil 75      | 3,0                   | 3,0   | 3,0  | 3,0                   | 3,0   | 3,0  | 3,0                   | 3,0   |

**T46- EVALUACIÓN INCOMODIDAD TRATAMIENTO (0-muy corto a 10-demasiado largo) según GRUPO y TIEMPO APERTURA-FINAL**

|             |                   | GRUPO                 |       |      |                       |       |      |                       |       |
|-------------|-------------------|-----------------------|-------|------|-----------------------|-------|------|-----------------------|-------|
|             |                   | Total                 |       |      | PEC                   |       |      | POT                   |       |
|             |                   | TIEMPO APERTURA-FINAL |       |      | TIEMPO APERTURA-FINAL |       |      | TIEMPO APERTURA-FINAL |       |
|             |                   | Total                 | <=8 m | >8 m | Total                 | <=8 m | >8 m | Total                 | <=8 m |
| INCOMODIDAD | N                 | 79                    | 41    | 38   | 39                    | 10    | 29   | 40                    | 31    |
|             | Media             | 1,5                   | 1,4   | 1,7  | 1,5                   | 1,2   | 1,6  | 1,6                   | 1,5   |
|             | Desviación típica | 1,9                   | 2,0   | 1,9  | 2,0                   | 2,3   | 2,0  | 1,8                   | 1,9   |
|             | Mínimo            | 0,0                   | 0,0   | 0,0  | 0,0                   | 0,0   | 0,0  | 0,0                   | 0,0   |
|             | Máximo            | 7,0                   | 6,0   | 7,0  | 7,0                   | 6,0   | 7,0  | 6,0                   | 6,0   |
|             | Percentil 25      | 0,0                   | 0,0   | 0,0  | 0,0                   | 0,0   | 0,0  | 0,0                   | 0,0   |
|             | Mediana           | 1,0                   | 1,0   | 1,0  | 0,0                   | 0,0   | 1,0  | 1,0                   | 1,0   |
|             | Percentil 75      | 3,0                   | 2,0   | 3,0  | 3,0                   | 1,0   | 3,0  | 3,0                   | 3,0   |

**T47- EVALUACIÓN SATISFACCIÓN GENERAL TRATAMIENTO (0-nada satisfecho a 10-muy satisfecho) según GRUPO y TIEMPO APERTURA-FINAL**

|  |  | GRUPO                 |       |      |                       |       |      |                       |       |
|--|--|-----------------------|-------|------|-----------------------|-------|------|-----------------------|-------|
|  |  | Total                 |       |      | PEC                   |       |      | POT                   |       |
|  |  | TIEMPO APERTURA-FINAL |       |      | TIEMPO APERTURA-FINAL |       |      | TIEMPO APERTURA-FINAL |       |
|  |  | Total                 | <=8 m | >8 m | Total                 | <=8 m | >8 m | Total                 | <=8 m |

|              |                   |      |      |      |      |      |      |      |      |
|--------------|-------------------|------|------|------|------|------|------|------|------|
| SATISFACCION | N                 | 79   | 41   | 38   | 39   | 10   | 29   | 40   | 31   |
|              | Media             | 9,1  | 9,3  | 8,9  | 9,2  | 9,7  | 9,0  | 9,1  | 9,2  |
|              | Desviación típica | 1,8  | 1,7  | 2,0  | 1,7  | 0,7  | 1,9  | 2,0  | 1,9  |
|              | Mínimo            | 1,0  | 1,0  | 1,0  | 1,0  | 8,0  | 1,0  | 1,0  | 1,0  |
|              | Máximo            | 10,0 | 10,0 | 10,0 | 10,0 | 10,0 | 10,0 | 10,0 | 10,0 |
|              | Percentil 25      | 9,0  | 10,0 | 8,0  | 9,0  | 10,0 | 9,0  | 9,0  | 10,0 |
|              | Mediana           | 10,0 | 10,0 | 10,0 | 10,0 | 10,0 | 10,0 | 10,0 | 10,0 |
|              | Percentil 75      | 10,0 | 10,0 | 10,0 | 10,0 | 10,0 | 10,0 | 10,0 | 10,0 |

#### T48- EVOLUCIÓN DOLOR (VAS) según GRUPO y SANGRADO PROFUSO

|           |                   | GRUPO            |      |      |                  |     |      |                  |      |
|-----------|-------------------|------------------|------|------|------------------|-----|------|------------------|------|
|           |                   | Total            |      |      | PEC              |     |      | POT              |      |
|           |                   | SANGRADO PROFUSO |      |      | SANGRADO PROFUSO |     |      | SANGRADO PROFUSO |      |
|           |                   | Total            | No   | Sí   | Total            | No  | Sí   | Total            | No   |
| DOLOR pre | N                 | 80               | 51   | 29   | 40               | 24  | 16   | 40               | 27   |
|           | Media             | 5,8              | 6,1  | 5,2  | 6,0              | 6,3 | 5,4  | 5,6              | 6,0  |
|           | Desviación típica | 2,8              | 2,5  | 3,2  | 2,6              | 2,1 | 3,2  | 3,1              | 2,9  |
|           | Mínimo            | 0,0              | 0,0  | 0,0  | 0,0              | 1,0 | 0,0  | 0,0              | 0,0  |
|           | Máximo            | 10,0             | 10,0 | 10,0 | 10,0             | 9,0 | 10,0 | 10,0             | 10,0 |
|           | Percentil 25      | 4,0              | 5,0  | 2,0  | 4,0              | 6,0 | 3,0  | 4,0              | 5,0  |
|           | Mediana           | 6,5              | 7,0  | 6,0  | 7,0              | 6,5 | 7,0  | 6,0              | 7,0  |
|           | Percentil 75      | 8,0              | 8,0  | 8,0  | 8,0              | 8,0 | 8,0  | 8,0              | 8,0  |
| DOLOR 6h  | N                 | 80               | 51   | 29   | 40               | 24  | 16   | 40               | 27   |
|           | Media             | 2,1              | 2,0  | 2,3  | 2,2              | 2,3 | 2,1  | 2,0              | 1,7  |
|           | Desviación típica | 2,4              | 2,3  | 2,7  | 2,6              | 2,6 | 2,7  | 2,3              | 1,9  |
|           | Mínimo            | 0,0              | 0,0  | 0,0  | 0,0              | 0,0 | 0,0  | 0,0              | 0,0  |
|           | Máximo            | 9,0              | 9,0  | 9,0  | 9,0              | 9,0 | 8,0  | 9,0              | 7,0  |
|           | Percentil 25      | 0,0              | 0,0  | 0,0  | 0,0              | 0,0 | 0,0  | 0,0              | 0,0  |
|           | Mediana           | 2,0              | 2,0  | 1,0  | 2,0              | 2,0 | 0,5  | 1,0              | 1,0  |
|           | Percentil 75      | 3,0              | 3,0  | 4,0  | 3,5              | 3,0 | 4,0  | 3,0              | 3,0  |
|           | N                 | 80               | 51   | 29   | 40               | 24  | 16   | 40               | 27   |
|           | Media             | 1,5              | 1,5  | 1,4  | 1,8              | 2,1 | 1,3  | 1,3              | 1,0  |



|           |                   |      |      |      |      |      |     |      |     |
|-----------|-------------------|------|------|------|------|------|-----|------|-----|
| DOLOR 24h | Desviación típica | 2,1  | 2,1  | 2,1  | 2,3  | 2,4  | 2,0 | 2,0  | 1,7 |
|           | Mínimo            | 0,0  | 0,0  | 0,0  | 0,0  | 0,0  | 0,0 | 0,0  | 0,0 |
|           | Máximo            | 9,0  | 9,0  | 7,0  | 9,0  | 9,0  | 7,0 | 7,0  | 5,0 |
|           | Percentil 25      | 0,0  | 0,0  | 0,0  | 0,0  | 0,0  | 0,0 | 0,0  | 0,0 |
|           | Mediana           | 1,0  | 1,0  | 0,0  | 1,0  | 1,5  | 0,0 | 0,0  | 0,0 |
|           | Percentil 75      | 2,0  | 2,0  | 2,0  | 2,5  | 3,0  | 2,0 | 1,5  | 1,0 |
| DOLOR 3d  | N                 | 80   | 51   | 29   | 40   | 24   | 16  | 40   | 27  |
|           | Media             | 1,3  | 1,4  | 1,2  | 1,3  | 1,5  | 0,8 | 1,3  | 1,2 |
|           | Desviación típica | 2,0  | 2,0  | 2,0  | 2,1  | 2,5  | 1,0 | 2,0  | 1,5 |
|           | Mínimo            | 0,0  | 0,0  | 0,0  | 0,0  | 0,0  | 0,0 | 0,0  | 0,0 |
|           | Máximo            | 10,0 | 10,0 | 10,0 | 10,0 | 10,0 | 3,0 | 10,0 | 5,0 |
|           | Percentil 25      | 0,0  | 0,0  | 0,0  | 0,0  | 0,0  | 0,0 | 0,0  | 0,0 |
|           | Mediana           | 0,0  | 0,0  | 0,0  | 0,0  | 0,0  | 0,0 | 0,5  | 0,0 |
|           | Percentil 75      | 2,0  | 2,0  | 2,0  | 2,0  | 2,5  | 2,0 | 2,0  | 2,0 |
|           |                   |      |      |      |      |      |     |      |     |

#### T49b- REDUCCIÓN DOLOR (VAS) 3d - PRE según GRUPO y SANGRADO PROFUSO

|                  |                   | GRUPO            |      |      |                  |      |      |                  |      |
|------------------|-------------------|------------------|------|------|------------------|------|------|------------------|------|
|                  |                   | Total            |      |      | PEC              |      |      | POT              |      |
|                  |                   | SANGRADO PROFUSO |      |      | SANGRADO PROFUSO |      |      | SANGRADO PROFUSO |      |
|                  |                   | Total            | No   | Sí   | Total            | No   | Sí   | Total            | No   |
| DIF.DOLOR.3d_PRE | N                 | 80               | 51   | 29   | 40               | 24   | 16   | 40               | 27   |
|                  | Media             | -4,5             | -4,8 | -4,0 | -4,7             | -4,8 | -4,6 | -4,3             | -4,8 |
|                  | Desviación típica | 3,5              | 3,1  | 4,1  | 3,2              | 3,3  | 3,1  | 3,8              | 3,1  |
|                  | Mínimo            | -9,0             | -9,0 | -9,0 | -9,0             | -9,0 | -9,0 | -9,0             | -8,0 |
|                  | Máximo            | 6,0              | 4,0  | 6,0  | 4,0              | 4,0  | 0,0  | 6,0              | 3,0  |
|                  | Percentil 25      | -7,0             | -7,0 | -8,0 | -7,0             | -7,0 | -7,5 | -7,0             | -7,0 |
|                  | Mediana           | -6,0             | -6,0 | -5,0 | -6,0             | -6,0 | -5,0 | -5,0             | -5,0 |
|                  | Percentil 75      | -1,5             | -3,0 | -1,0 | -1,5             | -2,5 | -1,0 | -1,5             | -3,0 |
|                  |                   |                  |      |      |                  |      |      |                  |      |

#### T49c.- TIEMPO HASTA NO DOLOR / DOLOR LEVE según GRUPO y SANGRADO PROFUSO

|  |  |  |  |  |  |  |  |  |  |
|--|--|--|--|--|--|--|--|--|--|
|  |  |  |  |  |  |  |  |  |  |
|--|--|--|--|--|--|--|--|--|--|

|                                    |               | Total            |         |    |         |    |         |       |         |
|------------------------------------|---------------|------------------|---------|----|---------|----|---------|-------|---------|
|                                    |               | SANGRADO PROFUSO |         |    |         |    |         |       |         |
|                                    |               | Total            |         | No |         | Sí |         | Total |         |
|                                    |               | N                | %       | N  | %       | N  | %       | N     | %       |
| TIEMPO HASTA NO DOLOR DEFINITIVO   | Total         | 80               | 100,0 % | 51 | 100,0 % | 29 | 100,0 % | 40    | 100,0 % |
|                                    | Pre           | 2                | 2,5 %   | 1  | 2,0 %   | 1  | 3,4 %   | 1     | 2,5 %   |
|                                    | 6h            | 20               | 25,0 %  | 11 | 21,6 %  | 9  | 31,0 %  | 10    | 25,0 %  |
|                                    | 24h           | 7                | 8,8 %   | 6  | 11,8 %  | 1  | 3,4 %   | 2     | 5,0 %   |
|                                    | 3d            | 12               | 15,0 %  | 9  | 17,6 %  | 3  | 10,3 %  | 9     | 22,5 %  |
|                                    | No se alcanza | 39               | 48,8 %  | 24 | 47,1 %  | 15 | 51,7 %  | 18    | 45,0 %  |
|                                    |               |                  |         |    |         |    |         |       |         |
| TIEMPO HASTA DOLOR LEVE DEFINITIVO | Total         | 80               | 100,0 % | 51 | 100,0 % | 29 | 100,0 % | 40    | 100,0 % |
|                                    | Pre           | 4                | 5,0 %   | 3  | 5,9 %   | 1  | 3,4 %   | 2     | 5,0 %   |
|                                    | 6h            | 53               | 66,3 %  | 35 | 68,6 %  | 18 | 62,1 %  | 24    | 60,0 %  |
|                                    | 24h           | 7                | 8,8 %   | 2  | 3,9 %   | 5  | 17,2 %  | 5     | 12,5 %  |
|                                    | 3d            | 7                | 8,8 %   | 4  | 7,8 %   | 3  | 10,3 %  | 4     | 10,0 %  |
|                                    | No se alcanza | 9                | 11,3 %  | 7  | 13,7 %  | 2  | 6,9 %   | 5     | 12,5 %  |
|                                    |               |                  |         |    |         |    |         |       |         |

**T50- EVALUACIÓN SATISFACCIÓN GENERAL TRATAMIENTO (0-nada satisfecho a 10-muy satisfecho) según GRUPO y SANGRADO PROFUSO**

|              |                   | GRUPO            |      |      |                  |      |      |                  |      |
|--------------|-------------------|------------------|------|------|------------------|------|------|------------------|------|
|              |                   | Total            |      |      | PEC              |      |      | POT              |      |
|              |                   | SANGRADO PROFUSO |      |      | SANGRADO PROFUSO |      |      | SANGRADO PROFUSO |      |
|              |                   | Total            | No   | Sí   | Total            | No   | Sí   | Total            | No   |
|              |                   |                  |      |      |                  |      |      |                  |      |
| SATISFACCION | N                 | 80               | 51   | 29   | 40               | 24   | 16   | 40               | 27   |
|              | Media             | 9,1              | 8,9  | 9,4  | 9,2              | 9,0  | 9,4  | 9,1              | 8,9  |
|              | Desviación típica | 1,8              | 2,2  | 0,9  | 1,7              | 2,1  | 0,8  | 2,0              | 2,3  |
|              | Mínimo            | 1,0              | 1,0  | 7,0  | 1,0              | 1,0  | 8,0  | 1,0              | 1,0  |
|              | Máximo            | 10,0             | 10,0 | 10,0 | 10,0             | 10,0 | 10,0 | 10,0             | 10,0 |
|              | Percentil 25      | 9,0              | 9,0  | 9,0  | 9,0              | 9,0  | 9,0  | 9,0              | 9,0  |
|              | Mediana           | 10,0             | 10,0 | 10,0 | 10,0             | 10,0 | 10,0 | 10,0             | 10,0 |
|              | Percentil 75      | 10,0             | 10,0 | 10,0 | 10,0             | 10,0 | 10,0 | 10,0             | 10,0 |
|              |                   |                  |      |      |                  |      |      |                  |      |

### T51.- SANGRADO PROFUSO según GRUPO y CAUSA

|       | Total |         |        |         |            |         |       |         |       |         |
|-------|-------|---------|--------|---------|------------|---------|-------|---------|-------|---------|
|       | CAUSA |         |        |         |            |         |       |         |       |         |
|       | Total |         | Caries |         | Obturación |         | Resto |         | Total |         |
|       | N     | %       | N      | %       | N          | %       | N     | %       | N     | %       |
| Total | 80    | 100,0 % | 40     | 100,0 % | 23         | 100,0 % | 17    | 100,0 % | 40    | 100,0 % |
| No    | 51    | 63,7 %  | 27     | 67,5 %  | 16         | 69,6 %  | 8     | 47,1 %  | 24    | 60,0 %  |
| Sí    | 29    | 36,3 %  | 13     | 32,5 %  | 7          | 30,4 %  | 9     | 52,9 %  | 16    | 40,0 %  |

### T52.- SANGRADO CONDUCTO según GRUPO y CAUSA

|       | Total |         |        |         |            |         |       |         |       |         |
|-------|-------|---------|--------|---------|------------|---------|-------|---------|-------|---------|
|       | CAUSA |         |        |         |            |         |       |         |       |         |
|       | Total |         | Caries |         | Obturación |         | Resto |         | Total |         |
|       | N     | %       | N      | %       | N          | %       | N     | %       | N     | %       |
| Total | 80    | 100,0 % | 40     | 100,0 % | 23         | 100,0 % | 17    | 100,0 % | 40    | 100,0 % |
| No    | 59    | 73,8 %  | 29     | 72,5 %  | 18         | 78,3 %  | 12    | 70,6 %  | 28    | 70,0 %  |
| Sí    | 21    | 26,3 %  | 11     | 27,5 %  | 5          | 21,7 %  | 5     | 29,4 %  | 12    | 30,0 %  |

### T53.- PAA PREVIO según GRUPO y CAUSA

|       | Total |         |        |         |            |         |       |         |       |         |
|-------|-------|---------|--------|---------|------------|---------|-------|---------|-------|---------|
|       | CAUSA |         |        |         |            |         |       |         |       |         |
|       | Total |         | Caries |         | Obturación |         | Resto |         | Total |         |
|       | N     | %       | N      | %       | N          | %       | N     | %       | N     | %       |
| Total | 80    | 100,0 % | 40     | 100,0 % | 23         | 100,0 % | 17    | 100,0 % | 40    | 100,0 % |
| No    | 47    | 58,8 %  | 24     | 60,0 %  | 11         | 47,8 %  | 12    | 70,6 %  | 20    | 50,0 %  |
| Sí    | 33    | 41,3 %  | 16     | 40,0 %  | 12         | 52,2 %  | 5     | 29,4 %  | 20    | 50,0 %  |

## T54- EVOLUCIÓN DOLOR (VAS) según GRUPO y CAUSA

|           |                   | GRUPO |        |            |       |       |        |            |       |
|-----------|-------------------|-------|--------|------------|-------|-------|--------|------------|-------|
|           |                   | Total |        |            |       | PEC   |        |            |       |
|           |                   | CAUSA |        |            |       | CAUSA |        |            |       |
|           |                   | Total | Caries | Obturación | Resto | Total | Caries | Obturación | Resto |
| DOLOR pre | N                 | 80    | 40     | 23         | 17    | 40    | 19     | 13         | 8     |
|           | Media             | 5,8   | 5,2    | 6,6        | 6,1   | 6,0   | 5,3    | 7,5        | 5,0   |
|           | Desviación típica | 2,8   | 2,9    | 2,4        | 3,0   | 2,6   | 2,8    | 1,5        | 2,6   |
|           | Mínimo            | 0,0   | 0,0    | 0,0        | 0,0   | 0,0   | 0,0    | 4,0        | 0,0   |
|           | Máximo            | 10,0  | 9,0    | 10,0       | 10,0  | 10,0  | 9,0    | 10,0       | 8,0   |
|           | Percentil 25      | 4,0   | 3,0    | 6,0        | 5,0   | 4,0   | 3,0    | 7,0        | 3,5   |
|           | Mediana           | 6,5   | 6,0    | 7,0        | 6,0   | 7,0   | 6,0    | 7,0        | 6,0   |
|           | Percentil 75      | 8,0   | 8,0    | 8,0        | 8,0   | 8,0   | 8,0    | 8,0        | 6,5   |
| DOLOR 6h  | N                 | 80    | 40     | 23         | 17    | 40    | 19     | 13         | 8     |
|           | Media             | 2,1   | 2,0    | 2,6        | 1,8   | 2,2   | 1,7    | 3,3        | 1,6   |
|           | Desviación típica | 2,4   | 2,3    | 2,4        | 2,8   | 2,6   | 2,6    | 2,3        | 2,8   |
|           | Mínimo            | 0,0   | 0,0    | 0,0        | 0,0   | 0,0   | 0,0    | 0,0        | 0,0   |
|           | Máximo            | 9,0   | 9,0    | 8,0        | 9,0   | 9,0   | 9,0    | 8,0        | 8,0   |
|           | Percentil 25      | 0,0   | 0,0    | 0,0        | 0,0   | 0,0   | 0,0    | 2,0        | 0,0   |
|           | Mediana           | 2,0   | 1,5    | 2,0        | 0,0   | 2,0   | 0,0    | 3,0        | 0,0   |
|           | Percentil 75      | 3,0   | 3,0    | 4,0        | 3,0   | 3,5   | 3,0    | 4,0        | 2,5   |
| DOLOR 24h | N                 | 80    | 40     | 23         | 17    | 40    | 19     | 13         | 8     |
|           | Media             | 1,5   | 1,5    | 1,7        | 1,3   | 1,8   | 1,6    | 2,3        | 1,1   |
|           | Desviación típica | 2,1   | 2,1    | 2,1        | 2,1   | 2,3   | 2,5    | 2,3        | 1,5   |
|           | Mínimo            | 0,0   | 0,0    | 0,0        | 0,0   | 0,0   | 0,0    | 0,0        | 0,0   |
|           | Máximo            | 9,0   | 9,0    | 8,0        | 7,0   | 9,0   | 9,0    | 8,0        | 4,0   |
|           | Percentil 25      | 0,0   | 0,0    | 0,0        | 0,0   | 0,0   | 0,0    | 0,0        | 0,0   |
|           | Mediana           | 1,0   | 1,0    | 1,0        | 0,0   | 1,0   | 1,0    | 2,0        | 0,5   |
|           | Percentil 75      | 2,0   | 2,0    | 3,0        | 2,0   | 2,5   | 2,0    | 3,0        | 2,0   |
|           | N                 | 80    | 40     | 23         | 17    | 40    | 19     | 13         | 8     |
|           | Media             | 1,3   | 0,8    | 2,1        | 1,4   | 1,3   | 0,5    | 1,8        | 2,1   |
|           | Desviación típica | 2,0   | 1,1    | 2,4        | 2,7   | 2,1   | 0,8    | 2,0        | 3,6   |

|          |              |      |     |      |      |      |     |     |      |
|----------|--------------|------|-----|------|------|------|-----|-----|------|
| DOLOR 3d | Mínimo       | 0,0  | 0,0 | 0,0  | 0,0  | 0,0  | 0,0 | 0,0 | 0,0  |
|          | Máximo       | 10,0 | 4,0 | 10,0 | 10,0 | 10,0 | 2,0 | 6,0 | 10,0 |
|          | Percentil 25 | 0,0  | 0,0 | 0,0  | 0,0  | 0,0  | 0,0 | 0,0 | 0,0  |
|          | Mediana      | 0,0  | 0,0 | 2,0  | 0,0  | 0,0  | 0,0 | 1,0 | 0,0  |
|          | Percentil 75 | 2,0  | 1,5 | 3,0  | 1,0  | 2,0  | 1,0 | 3,0 | 3,5  |
|          |              |      |     |      |      |      |     |     |      |

#### T54b- REDUCCIÓN DOLOR (VAS) 3d - PRE según GRUPO y CAUSA

|                  |                   | GRUPO |        |            |       |       |        |            |       |
|------------------|-------------------|-------|--------|------------|-------|-------|--------|------------|-------|
|                  |                   | Total |        |            |       | PEC   |        |            |       |
|                  |                   | CAUSA |        |            |       | CAUSA |        |            |       |
|                  |                   | Total | Caries | Obturación | Resto | Total | Caries | Obturación | Resto |
| DIF.DOLOR.3d_PRE | N                 | 80    | 40     | 23         | 17    | 40    | 19     | 13         | 8     |
|                  | Media             | -4,5  | -4,4   | -4,5       | -4,6  | -4,7  | -4,8   | -5,6       | -2,9  |
|                  | Desviación típica | 3,5   | 3,2    | 3,8        | 3,9   | 3,2   | 2,7    | 2,7        | 4,4   |
|                  | Mínimo            | -9,0  | -9,0   | -9,0       | -9,0  | -9,0  | -9,0   | -9,0       | -8,0  |
|                  | Máximo            | 6,0   | 4,0    | 6,0        | 4,0   | 4,0   | 0,0    | -1,0       | 4,0   |
|                  | Percentil 25      | -7,0  | -7,0   | -7,0       | -8,0  | -7,0  | -6,0   | -7,0       | -6,5  |
|                  | Mediana           | -6,0  | -5,0   | -6,0       | -6,0  | -6,0  | -6,0   | -6,0       | -3,5  |
|                  | Percentil 75      | -1,5  | -1,5   | -2,0       | -1,0  | -1,5  | -3,0   | -5,0       | 0,5   |
|                  |                   |       |        |            |       |       |        |            |       |

#### T54c.- TIEMPO HASTA NO DOLOR / DOLOR LEVE según GRUPO y CAUSA

|                                  |               | Total |         |        |         |            |         |       |         |
|----------------------------------|---------------|-------|---------|--------|---------|------------|---------|-------|---------|
|                                  |               | CAUSA |         |        |         |            |         |       |         |
|                                  |               | Total |         | Caries |         | Obturación |         | Resto |         |
|                                  |               | N     | %       | N      | %       | N          | %       | N     | %       |
| TIEMPO HASTA NO DOLOR DEFINITIVO | Total         | 80    | 100,0 % | 40     | 100,0 % | 23         | 100,0 % | 17    | 100,0 % |
|                                  | Pre           | 2     | 2,5 %   | 2      | 5,0 %   | 0          | 0,0 %   | 0     | 0,0 %   |
|                                  | 6h            | 20    | 25,0 %  | 10     | 25,0 %  | 4          | 17,4 %  | 6     | 35,3 %  |
|                                  | 24h           | 7     | 8,8 %   | 2      | 5,0 %   | 3          | 13,0 %  | 2     | 11,8 %  |
|                                  | 3d            | 12    | 15,0 %  | 8      | 20,0 %  | 1          | 4,3 %   | 3     | 17,6 %  |
|                                  | No se alcanza | 39    | 48,8 %  | 18     | 45,0 %  | 15         | 65,2 %  | 6     | 35,3 %  |

|                                          |               |    |         |    |         |    |         |    |         |
|------------------------------------------|---------------|----|---------|----|---------|----|---------|----|---------|
| TIEMPO HASTA<br>DOLOR LEVE<br>DEFINITIVO | Total         | 80 | 100,0 % | 40 | 100,0 % | 23 | 100,0 % | 17 | 100,0 % |
|                                          | Pre           | 4  | 5,0 %   | 3  | 7,5 %   | 0  | 0,0 %   | 1  | 5,9 %   |
|                                          | 6h            | 53 | 66,3 %  | 29 | 72,5 %  | 13 | 56,5 %  | 11 | 64,7 %  |
|                                          | 24h           | 7  | 8,8 %   | 1  | 2,5 %   | 4  | 17,4 %  | 2  | 11,8 %  |
|                                          | 3d            | 7  | 8,8 %   | 5  | 12,5 %  | 2  | 8,7 %   | 0  | 0,0 %   |
|                                          | No se alcanza | 9  | 11,3 %  | 2  | 5,0 %   | 4  | 17,4 %  | 3  | 17,6 %  |
|                                          |               |    |         |    |         |    |         |    |         |

#### T55- EVOLUCIÓN DOLOR (VAS) según GRUPO y ANESTESIA COMPLEMENTARIA

|           |                   | GRUPO                    |     |      |                          |     |      |                       |     |
|-----------|-------------------|--------------------------|-----|------|--------------------------|-----|------|-----------------------|-----|
|           |                   | Total                    |     |      | PEC                      |     |      | POT                   |     |
|           |                   | ANESTESIA COMPLEMENTARIA |     |      | ANESTESIA COMPLEMENTARIA |     |      | ANESTESIA COMPLEMENT. |     |
|           |                   | Total                    | No  | Sí   | Total                    | No  | Sí   | Total                 | No  |
| DOLOR pre | N                 | 80                       | 32  | 48   | 40                       | 16  | 24   | 40                    | 16  |
|           | Media             | 5,8                      | 5,6 | 5,9  | 6,0                      | 5,9 | 6,0  | 5,6                   | 5,3 |
|           | Desviación típica | 2,8                      | 2,9 | 2,8  | 2,6                      | 2,8 | 2,5  | 3,1                   | 3,0 |
|           | Mínimo            | 0,0                      | 0,0 | 0,0  | 0,0                      | 0,0 | 1,0  | 0,0                   | 0,0 |
|           | Máximo            | 10,0                     | 9,0 | 10,0 | 10,0                     | 9,0 | 10,0 | 10,0                  | 9,0 |
|           | Percentil 25      | 4,0                      | 4,0 | 4,0  | 4,0                      | 5,0 | 4,0  | 4,0                   | 3,0 |
|           | Mediana           | 6,5                      | 6,5 | 6,5  | 7,0                      | 7,0 | 6,0  | 6,0                   | 5,5 |
|           | Percentil 75      | 8,0                      | 8,0 | 8,0  | 8,0                      | 8,0 | 8,0  | 8,0                   | 8,0 |
| DOLOR 6h  | N                 | 80                       | 32  | 48   | 40                       | 16  | 24   | 40                    | 16  |
|           | Media             | 2,1                      | 2,5 | 1,9  | 2,2                      | 2,8 | 1,8  | 2,0                   | 2,2 |
|           | Desviación típica | 2,4                      | 2,8 | 2,2  | 2,6                      | 2,6 | 2,6  | 2,3                   | 3,0 |
|           | Mínimo            | 0,0                      | 0,0 | 0,0  | 0,0                      | 0,0 | 0,0  | 0,0                   | 0,0 |
|           | Máximo            | 9,0                      | 9,0 | 9,0  | 9,0                      | 8,0 | 9,0  | 9,0                   | 9,0 |
|           | Percentil 25      | 0,0                      | 0,0 | 0,0  | 0,0                      | 1,0 | 0,0  | 0,0                   | 0,0 |
|           | Mediana           | 2,0                      | 2,0 | 1,0  | 2,0                      | 2,0 | 0,0  | 1,0                   | 0,5 |
|           | Percentil 75      | 3,0                      | 4,0 | 3,0  | 3,5                      | 4,0 | 3,0  | 3,0                   | 4,0 |
| DOLOR 24h | N                 | 80                       | 32  | 48   | 40                       | 16  | 24   | 40                    | 16  |
|           | Media             | 1,5                      | 1,3 | 1,6  | 1,8                      | 1,3 | 2,0  | 1,3                   | 1,3 |
|           | Desviación típica | 2,1                      | 1,8 | 2,3  | 2,3                      | 1,4 | 2,7  | 2,0                   | 2,2 |
|           | Mínimo            | 0,0                      | 0,0 | 0,0  | 0,0                      | 0,0 | 0,0  | 0,0                   | 0,0 |
|           | Máximo            | 9,0                      | 7,0 | 9,0  | 9,0                      | 4,0 | 9,0  | 7,0                   | 7,0 |

|          |                   |      |      |      |      |     |      |      |      |
|----------|-------------------|------|------|------|------|-----|------|------|------|
| DOLOR 3d | Percentil 25      | 0,0  | 0,0  | 0,0  | 0,0  | 0,0 | 0,0  | 0,0  | 0,0  |
|          | Mediana           | 1,0  | 0,5  | 1,0  | 1,0  | 1,0 | 1,0  | 0,0  | 0,0  |
|          | Percentil 75      | 2,0  | 2,0  | 2,0  | 2,5  | 2,5 | 3,0  | 1,5  | 1,5  |
|          | N                 | 80   | 32   | 48   | 40   | 16  | 24   | 40   | 16   |
|          | Media             | 1,3  | 1,2  | 1,4  | 1,3  | 1,2 | 1,3  | 1,3  | 1,2  |
|          | Desviación típica | 2,0  | 2,1  | 2,0  | 2,1  | 1,6 | 2,4  | 2,0  | 2,5  |
|          | Mínimo            | 0,0  | 0,0  | 0,0  | 0,0  | 0,0 | 0,0  | 0,0  | 0,0  |
|          | Máximo            | 10,0 | 10,0 | 10,0 | 10,0 | 6,0 | 10,0 | 10,0 | 10,0 |
|          | Percentil 25      | 0,0  | 0,0  | 0,0  | 0,0  | 0,0 | 0,0  | 0,0  | 0,0  |
|          | Mediana           | 0,0  | 0,0  | 0,0  | 0,0  | 0,5 | 0,0  | 0,5  | 0,0  |
|          | Percentil 75      | 2,0  | 2,0  | 2,5  | 2,0  | 2,0 | 2,0  | 2,0  | 1,5  |
|          |                   |      |      |      |      |     |      |      |      |

#### T55b- REDUCCIÓN DOLOR (VAS) 3d - PRE según GRUPO y ANESTESIA COMPLEMENTARIA

|                  |                   | GRUPO                    |      |      |                          |      |      |                          |      |
|------------------|-------------------|--------------------------|------|------|--------------------------|------|------|--------------------------|------|
|                  |                   | Total                    |      |      | PEC                      |      |      | POT                      |      |
|                  |                   | ANESTESIA COMPLEMENTARIA |      |      | ANESTESIA COMPLEMENTARIA |      |      | ANESTESIA COMPLEMENTARIA |      |
|                  |                   | Total                    | No   | Sí   | Total                    | No   | Sí   | Total                    | No   |
| DIF.DOLOR.3d_PRE | N                 | 80                       | 32   | 48   | 40                       | 16   | 24   | 40                       | 16   |
|                  | Media             | -4,5                     | -4,4 | -4,5 | -4,7                     | -4,8 | -4,7 | -4,3                     | -4,1 |
|                  | Desviación típica | 3,5                      | 3,6  | 3,4  | 3,2                      | 2,9  | 3,4  | 3,8                      | 4,3  |
|                  | Mínimo            | -9,0                     | -9,0 | -9,0 | -9,0                     | -8,0 | -9,0 | -9,0                     | -9,0 |
|                  | Máximo            | 6,0                      | 6,0  | 4,0  | 4,0                      | 0,0  | 4,0  | 6,0                      | 6,0  |
|                  | Percentil 25      | -7,0                     | -7,0 | -7,0 | -7,0                     | -7,0 | -7,0 | -7,0                     | -7,5 |
|                  | Mediana           | -6,0                     | -5,5 | -6,0 | -6,0                     | -5,5 | -6,0 | -5,0                     | -5,5 |
|                  | Percentil 75      | -1,5                     | -2,0 | -1,0 | -1,5                     | -2,0 | -1,5 | -1,5                     | -2,0 |
|                  |                   |                          |      |      |                          |      |      |                          |      |

#### T55c.- TIEMPO HASTA NO DOLOR / DOLOR LEVE según GRUPO y ANESTESIA COMPLEMENTARIA

|  |  | Total                    |    |    |       |
|--|--|--------------------------|----|----|-------|
|  |  | ANESTESIA COMPLEMENTARIA |    |    |       |
|  |  | Total                    | No | Sí | Total |

|                                    |               | N  | %       | N  | %       | N  | %       | N  | %       |
|------------------------------------|---------------|----|---------|----|---------|----|---------|----|---------|
| TIEMPO HASTA NO DOLOR DEFINITIVO   | Total         | 80 | 100,0 % | 32 | 100,0 % | 48 | 100,0 % | 40 | 100,0 % |
|                                    | Pre           | 2  | 2,5 %   | 1  | 3,1 %   | 1  | 2,1 %   | 1  | 2,5 %   |
|                                    | 6h            | 20 | 25,0 %  | 10 | 31,3 %  | 10 | 20,8 %  | 10 | 25,0 %  |
|                                    | 24h           | 7  | 8,8 %   | 2  | 6,3 %   | 5  | 10,4 %  | 2  | 5,0 %   |
|                                    | 3d            | 12 | 15,0 %  | 4  | 12,5 %  | 8  | 16,7 %  | 9  | 22,5 %  |
|                                    | No se alcanza | 39 | 48,8 %  | 15 | 46,9 %  | 24 | 50,0 %  | 18 | 45,0 %  |
|                                    |               |    |         |    |         |    |         |    |         |
| TIEMPO HASTA DOLOR LEVE DEFINITIVO | Total         | 80 | 100,0 % | 32 | 100,0 % | 48 | 100,0 % | 40 | 100,0 % |
|                                    | Pre           | 4  | 5,0 %   | 1  | 3,1 %   | 3  | 6,3 %   | 2  | 5,0 %   |
|                                    | 6h            | 53 | 66,3 %  | 21 | 65,6 %  | 32 | 66,7 %  | 24 | 60,0 %  |
|                                    | 24h           | 7  | 8,8 %   | 5  | 15,6 %  | 2  | 4,2 %   | 5  | 12,5 %  |
|                                    | 3d            | 7  | 8,8 %   | 3  | 9,4 %   | 4  | 8,3 %   | 4  | 10,0 %  |
|                                    | No se alcanza | 9  | 11,3 %  | 2  | 6,3 %   | 7  | 14,6 %  | 5  | 12,5 %  |
|                                    |               |    |         |    |         |    |         |    |         |

#### T56- EVALUACIÓN SATISFACCIÓN GENERAL TRATAMIENTO (0-nada satisfecho a 10-muy satisfecho) según GRUPO y ANESTESIA COMPLEMENTARIA

|              |                   | GRUPO                    |      |      |                          |      |      |                          |      |
|--------------|-------------------|--------------------------|------|------|--------------------------|------|------|--------------------------|------|
|              |                   | Total                    |      |      | PEC                      |      |      | POT                      |      |
|              |                   | ANESTESIA COMPLEMENTARIA |      |      | ANESTESIA COMPLEMENTARIA |      |      | ANESTESIA COMPLEMENTARIA |      |
|              |                   | Total                    | No   | Sí   | Total                    | No   | Sí   | Total                    | No   |
| SATISFACCION | N                 | 80                       | 32   | 48   | 40                       | 16   | 24   | 40                       | 16   |
|              | Media             | 9,1                      | 9,4  | 8,9  | 9,2                      | 9,3  | 9,1  | 9,1                      | 9,6  |
|              | Desviación típica | 1,8                      | 1,2  | 2,1  | 1,7                      | 1,4  | 1,9  | 2,0                      | 1,1  |
|              | Mínimo            | 1,0                      | 5,0  | 1,0  | 1,0                      | 5,0  | 1,0  | 1,0                      | 6,0  |
|              | Máximo            | 10,0                     | 10,0 | 10,0 | 10,0                     | 10,0 | 10,0 | 10,0                     | 10,0 |
|              | Percentil 25      | 9,0                      | 9,5  | 8,5  | 9,0                      | 9,0  | 9,0  | 9,0                      | 10,0 |
|              | Mediana           | 10,0                     | 10,0 | 10,0 | 10,0                     | 10,0 | 10,0 | 10,0                     | 10,0 |
|              | Percentil 75      | 10,0                     | 10,0 | 10,0 | 10,0                     | 10,0 | 10,0 | 10,0                     | 10,0 |

#### T57.- INFLAMACIÓN ENCÍA POST-OPERATORIA según GRUPO E INTRALIGAMENTOSA

|  |  | Total |  |  |  |  |  |  |  |
|--|--|-------|--|--|--|--|--|--|--|



|                                                                                                                     |                   | INTRALIGAMENTOSA |         |     |              |      |         |              |         |
|---------------------------------------------------------------------------------------------------------------------|-------------------|------------------|---------|-----|--------------|------|---------|--------------|---------|
|                                                                                                                     |                   | Total            |         | No  |              | Sí   |         | Total        |         |
|                                                                                                                     |                   | N                | %       | N   | %            | N    | %       | N            | %       |
| INFLAMACION<br>ENCIA                                                                                                | Total             | 80               | 100,0 % | 43  | 100,0 %      | 37   | 100,0 % | 40           | 100,0 % |
|                                                                                                                     | No                | 76               | 95,0 %  | 43  | 100,0 %      | 33   | 89,2 %  | 38           | 95,0 %  |
|                                                                                                                     | Sí                | 4                | 5,0 %   | 0   | 0,0 %        | 4    | 10,8 %  | 2            | 5,0 %   |
| T58- EVALUACIÓN DURACIÓN TRATAMIENTO (0-muy corto a 10-demasiado largo) según GRUPO y RECONSTRUCCIÓN PRE-ENDODONCIA |                   |                  |         |     |              |      |         |              |         |
|                                                                                                                     |                   | GRUPO            |         |     |              |      |         |              |         |
|                                                                                                                     |                   | Total            |         |     | PEC          |      |         | POT          |         |
|                                                                                                                     |                   | RECO PREENDO     |         |     | RECO PREENDO |      |         | RECO PREENDO |         |
|                                                                                                                     |                   | Total            | No      | Sí  | Total        | No   | Sí      | Total        | No      |
| DURACION                                                                                                            | N                 | 80               | 49      | 31  | 40           | 23   | 17      | 40           | 26      |
|                                                                                                                     | Media             | 2,6              | 2,5     | 2,6 | 3,1          | 3,1  | 3,1     | 2,0          | 2,0     |
|                                                                                                                     | Desviación típica | 1,8              | 1,8     | 1,9 | 1,9          | 2,1  | 1,7     | 1,6          | 1,3     |
|                                                                                                                     | Mínimo            | 0,0              | 0,0     | 0,0 | 0,0          | 0,0  | 0,0     | 0,0          | 0,0     |
|                                                                                                                     | Máximo            | 10,0             | 10,0    | 6,0 | 10,0         | 10,0 | 6,0     | 5,0          | 4,0     |
|                                                                                                                     | Percentil 25      | 1,0              | 2,0     | 1,0 | 2,0          | 2,0  | 2,0     | 0,0          | 1,0     |
|                                                                                                                     | Mediana           | 3,0              | 3,0     | 3,0 | 3,0          | 3,0  | 3,0     | 3,0          | 3,0     |
|                                                                                                                     | Percentil 75      | 3,0              | 3,0     | 5,0 | 3,5          | 3,0  | 5,0     | 3,0          | 3,0     |































|      |         |    |         |    |         |    |         |    |         |
|------|---------|----|---------|----|---------|----|---------|----|---------|
| 23   | 100,0 % | 17 | 100,0 % | 40 | 100,0 % | 20 | 100,0 % | 20 | 100,0 % |
| 1    | 4,3 %   | 0  | 0,0 %   | 1  | 2,5 %   | 0  | 0,0 %   | 1  | 5,0 %   |
| 6    | 26,1 %  | 4  | 23,5 %  | 10 | 25,0 %  | 6  | 30,0 %  | 4  | 20,0 %  |
| 2    | 8,7 %   | 0  | 0,0 %   | 5  | 12,5 %  | 1  | 5,0 %   | 4  | 20,0 %  |
| 6    | 26,1 %  | 3  | 17,6 %  | 3  | 7,5 %   | 0  | 0,0 %   | 3  | 15,0 %  |
| 8    | 34,8 %  | 10 | 58,8 %  | 21 | 52,5 %  | 13 | 65,0 %  | 8  | 40,0 %  |
| 23   | 100,0 % | 17 | 100,0 % | 40 | 100,0 % | 20 | 100,0 % | 20 | 100,0 % |
| 2    | 8,7 %   | 0  | 0,0 %   | 2  | 5,0 %   | 0  | 0,0 %   | 2  | 10,0 %  |
| 15   | 65,2 %  | 9  | 52,9 %  | 29 | 72,5 %  | 15 | 75,0 %  | 14 | 70,0 %  |
| 2    | 8,7 %   | 3  | 17,6 %  | 2  | 5,0 %   | 1  | 5,0 %   | 1  | 5,0 %   |
| 2    | 8,7 %   | 2  | 11,8 %  | 3  | 7,5 %   | 3  | 15,0 %  | 0  | 0,0 %   |
| 2    | 8,7 %   | 3  | 17,6 %  | 4  | 10,0 %  | 1  | 5,0 %   | 3  | 15,0 %  |
|      |         |    |         |    |         |    |         |    |         |
|      |         |    |         |    |         |    |         |    |         |
|      |         |    |         |    |         |    |         |    |         |
|      |         |    |         |    |         |    |         |    |         |
| Si   |         |    |         |    |         |    |         |    |         |
| 20   |         |    |         |    |         |    |         |    |         |
| 8,7  |         |    |         |    |         |    |         |    |         |
| 2,5  |         |    |         |    |         |    |         |    |         |
| 1,0  |         |    |         |    |         |    |         |    |         |
| 10,0 |         |    |         |    |         |    |         |    |         |
| 8,5  |         |    |         |    |         |    |         |    |         |
| 10,0 |         |    |         |    |         |    |         |    |         |
| 10,0 |         |    |         |    |         |    |         |    |         |
|      |         |    |         |    |         |    |         |    |         |
|      |         |    |         |    |         |    |         |    |         |
|      |         |    |         |    |         |    |         |    |         |
|      |         |    |         |    |         |    |         |    |         |



|      |  |  |  |  |  |  |  |  |  |
|------|--|--|--|--|--|--|--|--|--|
| Si   |  |  |  |  |  |  |  |  |  |
| 13   |  |  |  |  |  |  |  |  |  |
| 6,2  |  |  |  |  |  |  |  |  |  |
| 3,7  |  |  |  |  |  |  |  |  |  |
| 0,0  |  |  |  |  |  |  |  |  |  |
| 10,0 |  |  |  |  |  |  |  |  |  |
| 5,0  |  |  |  |  |  |  |  |  |  |
| 8,0  |  |  |  |  |  |  |  |  |  |
| 9,0  |  |  |  |  |  |  |  |  |  |
| 13   |  |  |  |  |  |  |  |  |  |
| 1,6  |  |  |  |  |  |  |  |  |  |
| 1,9  |  |  |  |  |  |  |  |  |  |
| 0,0  |  |  |  |  |  |  |  |  |  |
| 6,0  |  |  |  |  |  |  |  |  |  |
| 0,0  |  |  |  |  |  |  |  |  |  |
| 1,0  |  |  |  |  |  |  |  |  |  |
| 2,0  |  |  |  |  |  |  |  |  |  |
| 13   |  |  |  |  |  |  |  |  |  |
| 1,2  |  |  |  |  |  |  |  |  |  |
| 1,6  |  |  |  |  |  |  |  |  |  |
| 0,0  |  |  |  |  |  |  |  |  |  |
| 5,0  |  |  |  |  |  |  |  |  |  |
| 0,0  |  |  |  |  |  |  |  |  |  |
| 1,0  |  |  |  |  |  |  |  |  |  |
| 1,0  |  |  |  |  |  |  |  |  |  |
| 13   |  |  |  |  |  |  |  |  |  |
| 1,0  |  |  |  |  |  |  |  |  |  |
| 1,4  |  |  |  |  |  |  |  |  |  |
| 0,0  |  |  |  |  |  |  |  |  |  |
| 4,0  |  |  |  |  |  |  |  |  |  |
| 0,0  |  |  |  |  |  |  |  |  |  |
| 0,0  |  |  |  |  |  |  |  |  |  |

|      |  |  |  |  |  |  |  |  |  |
|------|--|--|--|--|--|--|--|--|--|
| 2,0  |  |  |  |  |  |  |  |  |  |
|      |  |  |  |  |  |  |  |  |  |
|      |  |  |  |  |  |  |  |  |  |
|      |  |  |  |  |  |  |  |  |  |
|      |  |  |  |  |  |  |  |  |  |
| Si   |  |  |  |  |  |  |  |  |  |
| 13   |  |  |  |  |  |  |  |  |  |
| -5,2 |  |  |  |  |  |  |  |  |  |
| 4,1  |  |  |  |  |  |  |  |  |  |
| -9,0 |  |  |  |  |  |  |  |  |  |
| 4,0  |  |  |  |  |  |  |  |  |  |
| -8,0 |  |  |  |  |  |  |  |  |  |
| -7,0 |  |  |  |  |  |  |  |  |  |
| -3,0 |  |  |  |  |  |  |  |  |  |
|      |  |  |  |  |  |  |  |  |  |

| GRUPO |         |    |         |       |         |    |         |    |         |
|-------|---------|----|---------|-------|---------|----|---------|----|---------|
| PEC   |         |    |         |       | POT     |    |         |    |         |
| PAA   |         |    |         |       | PAA     |    |         |    |         |
| No    |         | Sí |         | Total |         | No |         | Sí |         |
| N     | %       | N  | %       | N     | %       | N  | %       | N  | %       |
| 20    | 100,0 % | 20 | 100,0 % | 40    | 100,0 % | 27 | 100,0 % | 13 | 100,0 % |
| 1     | 5,0 %   | 0  | 0,0 %   | 1     | 2,5 %   | 0  | 0,0 %   | 1  | 7,7 %   |
| 6     | 30,0 %  | 4  | 20,0 %  | 10    | 25,0 %  | 8  | 29,6 %  | 2  | 15,4 %  |
| 1     | 5,0 %   | 1  | 5,0 %   | 5     | 12,5 %  | 3  | 11,1 %  | 2  | 15,4 %  |
| 4     | 20,0 %  | 5  | 25,0 %  | 3     | 7,5 %   | 1  | 3,7 %   | 2  | 15,4 %  |
| 8     | 40,0 %  | 10 | 50,0 %  | 21    | 52,5 %  | 15 | 55,6 %  | 6  | 46,2 %  |
| 20    | 100,0 % | 20 | 100,0 % | 40    | 100,0 % | 27 | 100,0 % | 13 | 100,0 % |
| 2     | 10,0 %  | 0  | 0,0 %   | 2     | 5,0 %   | 0  | 0,0 %   | 2  | 15,4 %  |
| 13    | 65,0 %  | 11 | 55,0 %  | 29    | 72,5 %  | 20 | 74,1 %  | 9  | 69,2 %  |

|   |        |   |        |   |        |   |        |   |       |
|---|--------|---|--------|---|--------|---|--------|---|-------|
| 1 | 5,0 %  | 4 | 20,0 % | 2 | 5,0 %  | 2 | 7,4 %  | 0 | 0,0 % |
| 2 | 10,0 % | 2 | 10,0 % | 3 | 7,5 %  | 2 | 7,4 %  | 1 | 7,7 % |
| 2 | 10,0 % | 3 | 15,0 % | 4 | 10,0 % | 3 | 11,1 % | 1 | 7,7 % |

[illegible]

| JPO     |    |         |       |         |    |         |    |         |
|---------|----|---------|-------|---------|----|---------|----|---------|
| EC      |    |         | POT   |         |    |         |    |         |
| CA      |    |         | PAA   |         |    |         |    |         |
| o       | Sí |         | Total |         | No |         | Sí |         |
| %       | N  | %       | N     | %       | N  | %       | N  | %       |
| 100,0 % | 20 | 100,0 % | 40    | 100,0 % | 27 | 100,0 % | 13 | 100,0 % |
| 95,0 %  | 17 | 85,0 %  | 32    | 80,0 %  | 21 | 77,8 %  | 11 | 84,6 %  |
| 5,0 %   | 3  | 15,0 %  | 8     | 20,0 %  | 6  | 22,2 %  | 2  | 15,4 %  |

[illegible]



|      |  |  |  |  |  |  |  |  |  |
|------|--|--|--|--|--|--|--|--|--|
| 0,0  |  |  |  |  |  |  |  |  |  |
| 10,0 |  |  |  |  |  |  |  |  |  |
| 5,0  |  |  |  |  |  |  |  |  |  |
| 8,0  |  |  |  |  |  |  |  |  |  |
| 9,0  |  |  |  |  |  |  |  |  |  |
| 20   |  |  |  |  |  |  |  |  |  |
| 1,9  |  |  |  |  |  |  |  |  |  |
| 1,7  |  |  |  |  |  |  |  |  |  |
| 0,0  |  |  |  |  |  |  |  |  |  |
| 6,0  |  |  |  |  |  |  |  |  |  |
| 0,0  |  |  |  |  |  |  |  |  |  |
| 2,0  |  |  |  |  |  |  |  |  |  |
| 3,0  |  |  |  |  |  |  |  |  |  |
| 20   |  |  |  |  |  |  |  |  |  |
| 1,2  |  |  |  |  |  |  |  |  |  |
| 1,7  |  |  |  |  |  |  |  |  |  |
| 0,0  |  |  |  |  |  |  |  |  |  |
| 5,0  |  |  |  |  |  |  |  |  |  |
| 0,0  |  |  |  |  |  |  |  |  |  |
| 0,5  |  |  |  |  |  |  |  |  |  |
| 1,5  |  |  |  |  |  |  |  |  |  |
| 20   |  |  |  |  |  |  |  |  |  |
| 1,4  |  |  |  |  |  |  |  |  |  |
| 1,6  |  |  |  |  |  |  |  |  |  |
| 0,0  |  |  |  |  |  |  |  |  |  |
| 5,0  |  |  |  |  |  |  |  |  |  |
| 0,0  |  |  |  |  |  |  |  |  |  |
| 1,0  |  |  |  |  |  |  |  |  |  |
| 2,5  |  |  |  |  |  |  |  |  |  |
|      |  |  |  |  |  |  |  |  |  |
|      |  |  |  |  |  |  |  |  |  |
|      |  |  |  |  |  |  |  |  |  |

|         |  |  |  |  |  |  |  |  |  |
|---------|--|--|--|--|--|--|--|--|--|
|         |  |  |  |  |  |  |  |  |  |
| RE      |  |  |  |  |  |  |  |  |  |
| Intensa |  |  |  |  |  |  |  |  |  |
| 20      |  |  |  |  |  |  |  |  |  |
| -5,4    |  |  |  |  |  |  |  |  |  |
| 3,2     |  |  |  |  |  |  |  |  |  |
| -9,0    |  |  |  |  |  |  |  |  |  |
| 1,0     |  |  |  |  |  |  |  |  |  |
| -8,0    |  |  |  |  |  |  |  |  |  |
| -7,0    |  |  |  |  |  |  |  |  |  |
| -3,5    |  |  |  |  |  |  |  |  |  |
|         |  |  |  |  |  |  |  |  |  |

| GRUPO                 |         |         |         |       |                       |                |         |         |         |
|-----------------------|---------|---------|---------|-------|-----------------------|----------------|---------|---------|---------|
| PEC                   |         |         |         |       | POT                   |                |         |         |         |
| MOLESTIA MASTICAR PRE |         |         |         |       | MOLESTIA MASTICAR PRE |                |         |         |         |
| Hasta moderada        |         | Intensa |         | Total |                       | Hasta moderada |         | Intensa |         |
| N                     | %       | N       | %       | N     | %                     | N              | %       | N       | %       |
| 14                    | 100,0 % | 26      | 100,0 % | 40    | 100,0 %               | 20             | 100,0 % | 20      | 100,0 % |
| 0                     | 0,0 %   | 1       | 3,8 %   | 1     | 2,5 %                 | 0              | 0,0 %   | 1       | 5,0 %   |
| 4                     | 28,6 %  | 6       | 23,1 %  | 10    | 25,0 %                | 7              | 35,0 %  | 3       | 15,0 %  |
| 1                     | 7,1 %   | 1       | 3,8 %   | 5     | 12,5 %                | 2              | 10,0 %  | 3       | 15,0 %  |
| 4                     | 28,6 %  | 5       | 19,2 %  | 3     | 7,5 %                 | 1              | 5,0 %   | 2       | 10,0 %  |
| 5                     | 35,7 %  | 13      | 50,0 %  | 21    | 52,5 %                | 10             | 50,0 %  | 11      | 55,0 %  |
| 14                    | 100,0 % | 26      | 100,0 % | 40    | 100,0 %               | 20             | 100,0 % | 20      | 100,0 % |
| 0                     | 0,0 %   | 2       | 7,7 %   | 2     | 5,0 %                 | 0              | 0,0 %   | 2       | 10,0 %  |
| 10                    | 71,4 %  | 14      | 53,8 %  | 29    | 72,5 %                | 14             | 70,0 %  | 15      | 75,0 %  |
| 1                     | 7,1 %   | 4       | 15,4 %  | 2     | 5,0 %                 | 2              | 10,0 %  | 0       | 0,0 %   |
| 2                     | 14,3 %  | 2       | 7,7 %   | 3     | 7,5 %                 | 2              | 10,0 %  | 1       | 5,0 %   |
| 1                     | 7,1 %   | 4       | 15,4 %  | 4     | 10,0 %                | 2              | 10,0 %  | 2       | 10,0 %  |
|                       |         |         |         |       |                       |                |         |         |         |

|              |         |         |                       |         |                |         |         |         |  |
|--------------|---------|---------|-----------------------|---------|----------------|---------|---------|---------|--|
|              |         |         |                       |         |                |         |         |         |  |
|              |         |         |                       |         |                |         |         |         |  |
|              |         |         |                       |         |                |         |         |         |  |
| RE           |         |         |                       |         |                |         |         |         |  |
| Intensa      |         |         |                       |         |                |         |         |         |  |
| 20           |         |         |                       |         |                |         |         |         |  |
| 8,5          |         |         |                       |         |                |         |         |         |  |
| 2,6          |         |         |                       |         |                |         |         |         |  |
| 1,0          |         |         |                       |         |                |         |         |         |  |
| 10,0         |         |         |                       |         |                |         |         |         |  |
| 8,0          |         |         |                       |         |                |         |         |         |  |
| 10,0         |         |         |                       |         |                |         |         |         |  |
| 10,0         |         |         |                       |         |                |         |         |         |  |
|              |         |         |                       |         |                |         |         |         |  |
| JPO          |         |         |                       |         |                |         |         |         |  |
| EC           |         |         | POT                   |         |                |         |         |         |  |
| MASTICAR PRE |         |         | MOLESTIA MASTICAR PRE |         |                |         |         |         |  |
| Moderada     | Intensa |         | Total                 |         | Hasta moderada |         | Intensa |         |  |
| %            | N       | %       | N                     | %       | N              | %       | N       | %       |  |
| 100,0 %      | 26      | 100,0 % | 40                    | 100,0 % | 20             | 100,0 % | 20      | 100,0 % |  |
| 100,0 %      | 22      | 84,6 %  | 32                    | 80,0 %  | 13             | 65,0 %  | 19      | 95,0 %  |  |
| 0,0 %        | 4       | 15,4 %  | 8                     | 20,0 %  | 7              | 35,0 %  | 1       | 5,0 %   |  |
|              |         |         |                       |         |                |         |         |         |  |
|              |         |         |                       |         |                |         |         |         |  |
|              |         |         |                       |         |                |         |         |         |  |
|              |         |         |                       |         |                |         |         |         |  |
|              |         |         |                       |         |                |         |         |         |  |
|              |         |         |                       |         |                |         |         |         |  |

|             |      |     |     |  |  |  |  |  |  |
|-------------|------|-----|-----|--|--|--|--|--|--|
|             |      |     |     |  |  |  |  |  |  |
|             |      |     |     |  |  |  |  |  |  |
|             |      |     |     |  |  |  |  |  |  |
|             |      |     |     |  |  |  |  |  |  |
|             |      |     |     |  |  |  |  |  |  |
|             |      |     |     |  |  |  |  |  |  |
|             |      |     |     |  |  |  |  |  |  |
|             |      |     |     |  |  |  |  |  |  |
|             |      |     |     |  |  |  |  |  |  |
|             |      |     |     |  |  |  |  |  |  |
|             |      |     |     |  |  |  |  |  |  |
| POT         |      |     |     |  |  |  |  |  |  |
| EXPERIENCIA |      |     |     |  |  |  |  |  |  |
| No          | Sí   | NS  |     |  |  |  |  |  |  |
| 9           | 26   | 5   |     |  |  |  |  |  |  |
| 2,6         | 3,1  | 5,6 |     |  |  |  |  |  |  |
| 3,1         | 3,6  | 3,5 |     |  |  |  |  |  |  |
| 0,0         | 0,0  | 0,0 |     |  |  |  |  |  |  |
| 7,0         | 10,0 | 9,0 |     |  |  |  |  |  |  |
| 0,0         | 0,0  | 5,0 |     |  |  |  |  |  |  |
| 0,0         | 0,5  | 6,0 |     |  |  |  |  |  |  |
| 6,0         | 6,0  | 8,0 |     |  |  |  |  |  |  |
|             |      |     |     |  |  |  |  |  |  |
|             |      |     |     |  |  |  |  |  |  |
|             |      |     |     |  |  |  |  |  |  |
| POT         |      |     |     |  |  |  |  |  |  |
| EXPERIENCIA |      |     |     |  |  |  |  |  |  |
| Total       | No   | Sí  | NS  |  |  |  |  |  |  |
| 40          | 9    | 26  | 5   |  |  |  |  |  |  |
| 1,6         | 2,0  | 1,7 | 0,6 |  |  |  |  |  |  |
| 1,8         | 2,5  | 1,7 | 0,5 |  |  |  |  |  |  |
| 0,0         | 0,0  | 0,0 | 0,0 |  |  |  |  |  |  |



[illegible]

|        |  |  |  |  |  |  |  |  |  |
|--------|--|--|--|--|--|--|--|--|--|
|        |  |  |  |  |  |  |  |  |  |
|        |  |  |  |  |  |  |  |  |  |
|        |  |  |  |  |  |  |  |  |  |
|        |  |  |  |  |  |  |  |  |  |
|        |  |  |  |  |  |  |  |  |  |
| TURA   |  |  |  |  |  |  |  |  |  |
| >=15 m |  |  |  |  |  |  |  |  |  |
| 14     |  |  |  |  |  |  |  |  |  |
| 6,0    |  |  |  |  |  |  |  |  |  |
| 2,8    |  |  |  |  |  |  |  |  |  |
| 0,0    |  |  |  |  |  |  |  |  |  |
| 9,0    |  |  |  |  |  |  |  |  |  |
| 5,0    |  |  |  |  |  |  |  |  |  |
| 7,0    |  |  |  |  |  |  |  |  |  |
| 8,0    |  |  |  |  |  |  |  |  |  |
| 14     |  |  |  |  |  |  |  |  |  |
| 2,1    |  |  |  |  |  |  |  |  |  |
| 2,3    |  |  |  |  |  |  |  |  |  |
| 0,0    |  |  |  |  |  |  |  |  |  |
| 9,0    |  |  |  |  |  |  |  |  |  |
| 1,0    |  |  |  |  |  |  |  |  |  |
| 1,5    |  |  |  |  |  |  |  |  |  |
| 3,0    |  |  |  |  |  |  |  |  |  |
| 14     |  |  |  |  |  |  |  |  |  |
| 1,3    |  |  |  |  |  |  |  |  |  |
| 2,2    |  |  |  |  |  |  |  |  |  |
| 0,0    |  |  |  |  |  |  |  |  |  |
| 7,0    |  |  |  |  |  |  |  |  |  |
| 0,0    |  |  |  |  |  |  |  |  |  |
| 0,0    |  |  |  |  |  |  |  |  |  |
| 1,0    |  |  |  |  |  |  |  |  |  |
| 14     |  |  |  |  |  |  |  |  |  |

|        |  |  |  |  |  |  |  |  |  |
|--------|--|--|--|--|--|--|--|--|--|
| 0,7    |  |  |  |  |  |  |  |  |  |
| 1,3    |  |  |  |  |  |  |  |  |  |
| 0,0    |  |  |  |  |  |  |  |  |  |
| 4,0    |  |  |  |  |  |  |  |  |  |
| 0,0    |  |  |  |  |  |  |  |  |  |
| 0,0    |  |  |  |  |  |  |  |  |  |
| 1,0    |  |  |  |  |  |  |  |  |  |
|        |  |  |  |  |  |  |  |  |  |
|        |  |  |  |  |  |  |  |  |  |
|        |  |  |  |  |  |  |  |  |  |
|        |  |  |  |  |  |  |  |  |  |
| TURA   |  |  |  |  |  |  |  |  |  |
| >=15 m |  |  |  |  |  |  |  |  |  |
| 14     |  |  |  |  |  |  |  |  |  |
| -5,3   |  |  |  |  |  |  |  |  |  |
| 3,3    |  |  |  |  |  |  |  |  |  |
| -9,0   |  |  |  |  |  |  |  |  |  |
| 1,0    |  |  |  |  |  |  |  |  |  |
| -8,0   |  |  |  |  |  |  |  |  |  |
| -6,0   |  |  |  |  |  |  |  |  |  |
| -4,0   |  |  |  |  |  |  |  |  |  |
|        |  |  |  |  |  |  |  |  |  |

| GRUPO                     |         |        |         |       |                           |       |         |        |         |
|---------------------------|---------|--------|---------|-------|---------------------------|-------|---------|--------|---------|
| PEC                       |         |        |         |       | POT                       |       |         |        |         |
| TIEMPO ANESTESIA-APERTURA |         |        |         |       | TIEMPO ANESTESIA-APERTURA |       |         |        |         |
| <15 m                     |         | >=15 m |         | Total |                           | <15 m |         | >=15 m |         |
| N                         | %       | N      | %       | N     | %                         | N     | %       | N      | %       |
| 16                        | 100,0 % | 23     | 100,0 % | 40    | 100,0 %                   | 26    | 100,0 % | 14     | 100,0 % |
| 1                         | 6,3 %   | 0      | 0,0 %   | 1     | 2,5 %                     | 1     | 3,8 %   | 0      | 0,0 %   |
| 7                         | 43,8 %  | 3      | 13,0 %  | 10    | 25,0 %                    | 7     | 26,9 %  | 3      | 21,4 %  |

|    |         |    |         |    |         |    |         |    |         |
|----|---------|----|---------|----|---------|----|---------|----|---------|
| 0  | 0,0 %   | 2  | 8,7 %   | 5  | 12,5 %  | 2  | 7,7 %   | 3  | 21,4 %  |
| 3  | 18,8 %  | 5  | 21,7 %  | 3  | 7,5 %   | 0  | 0,0 %   | 3  | 21,4 %  |
| 5  | 31,3 %  | 13 | 56,5 %  | 21 | 52,5 %  | 16 | 61,5 %  | 5  | 35,7 %  |
| 16 | 100,0 % | 23 | 100,0 % | 40 | 100,0 % | 26 | 100,0 % | 14 | 100,0 % |
| 1  | 6,3 %   | 1  | 4,3 %   | 2  | 5,0 %   | 1  | 3,8 %   | 1  | 7,1 %   |
| 11 | 68,8 %  | 12 | 52,2 %  | 29 | 72,5 %  | 18 | 69,2 %  | 11 | 78,6 %  |
| 2  | 12,5 %  | 3  | 13,0 %  | 2  | 5,0 %   | 1  | 3,8 %   | 1  | 7,1 %   |
| 0  | 0,0 %   | 4  | 17,4 %  | 3  | 7,5 %   | 3  | 11,5 %  | 0  | 0,0 %   |
| 2  | 12,5 %  | 3  | 13,0 %  | 4  | 10,0 %  | 3  | 11,5 %  | 1  | 7,1 %   |

|        |  |  |  |  |  |  |  |  |  |
|--------|--|--|--|--|--|--|--|--|--|
|        |  |  |  |  |  |  |  |  |  |
|        |  |  |  |  |  |  |  |  |  |
|        |  |  |  |  |  |  |  |  |  |
|        |  |  |  |  |  |  |  |  |  |
| TURA   |  |  |  |  |  |  |  |  |  |
| >=15 m |  |  |  |  |  |  |  |  |  |
| 14     |  |  |  |  |  |  |  |  |  |
| 1,5    |  |  |  |  |  |  |  |  |  |
| 1,2    |  |  |  |  |  |  |  |  |  |
| 0,0    |  |  |  |  |  |  |  |  |  |
| 3,0    |  |  |  |  |  |  |  |  |  |
| 0,0    |  |  |  |  |  |  |  |  |  |
| 1,5    |  |  |  |  |  |  |  |  |  |
| 3,0    |  |  |  |  |  |  |  |  |  |
|        |  |  |  |  |  |  |  |  |  |
|        |  |  |  |  |  |  |  |  |  |
|        |  |  |  |  |  |  |  |  |  |
|        |  |  |  |  |  |  |  |  |  |
| TURA   |  |  |  |  |  |  |  |  |  |
| >=15 m |  |  |  |  |  |  |  |  |  |
| 14     |  |  |  |  |  |  |  |  |  |
| 2,1    |  |  |  |  |  |  |  |  |  |

|        |  |  |  |  |  |  |  |  |  |
|--------|--|--|--|--|--|--|--|--|--|
| 2,2    |  |  |  |  |  |  |  |  |  |
| 0,0    |  |  |  |  |  |  |  |  |  |
| 6,0    |  |  |  |  |  |  |  |  |  |
| 0,0    |  |  |  |  |  |  |  |  |  |
| 1,0    |  |  |  |  |  |  |  |  |  |
| 3,0    |  |  |  |  |  |  |  |  |  |
|        |  |  |  |  |  |  |  |  |  |
|        |  |  |  |  |  |  |  |  |  |
|        |  |  |  |  |  |  |  |  |  |
|        |  |  |  |  |  |  |  |  |  |
| TURA   |  |  |  |  |  |  |  |  |  |
| >=15 m |  |  |  |  |  |  |  |  |  |
| 14     |  |  |  |  |  |  |  |  |  |
| 8,6    |  |  |  |  |  |  |  |  |  |
| 2,9    |  |  |  |  |  |  |  |  |  |
| 1,0    |  |  |  |  |  |  |  |  |  |
| 10,0   |  |  |  |  |  |  |  |  |  |
| 9,0    |  |  |  |  |  |  |  |  |  |
| 10,0   |  |  |  |  |  |  |  |  |  |
| 10,0   |  |  |  |  |  |  |  |  |  |
|        |  |  |  |  |  |  |  |  |  |
|        |  |  |  |  |  |  |  |  |  |
|        |  |  |  |  |  |  |  |  |  |
|        |  |  |  |  |  |  |  |  |  |
| AL     |  |  |  |  |  |  |  |  |  |
| >8 m   |  |  |  |  |  |  |  |  |  |
| 9      |  |  |  |  |  |  |  |  |  |
| 4,3    |  |  |  |  |  |  |  |  |  |
| 3,8    |  |  |  |  |  |  |  |  |  |
| 0,0    |  |  |  |  |  |  |  |  |  |
| 9,0    |  |  |  |  |  |  |  |  |  |

|      |  |  |  |  |  |  |  |  |  |
|------|--|--|--|--|--|--|--|--|--|
| 0,0  |  |  |  |  |  |  |  |  |  |
| 4,0  |  |  |  |  |  |  |  |  |  |
| 8,0  |  |  |  |  |  |  |  |  |  |
| 9    |  |  |  |  |  |  |  |  |  |
| 3,2  |  |  |  |  |  |  |  |  |  |
| 2,5  |  |  |  |  |  |  |  |  |  |
| 0,0  |  |  |  |  |  |  |  |  |  |
| 7,0  |  |  |  |  |  |  |  |  |  |
| 1,0  |  |  |  |  |  |  |  |  |  |
| 3,0  |  |  |  |  |  |  |  |  |  |
| 4,0  |  |  |  |  |  |  |  |  |  |
| 9    |  |  |  |  |  |  |  |  |  |
| 2,6  |  |  |  |  |  |  |  |  |  |
| 2,4  |  |  |  |  |  |  |  |  |  |
| 0,0  |  |  |  |  |  |  |  |  |  |
| 5,0  |  |  |  |  |  |  |  |  |  |
| 1,0  |  |  |  |  |  |  |  |  |  |
| 1,0  |  |  |  |  |  |  |  |  |  |
| 5,0  |  |  |  |  |  |  |  |  |  |
| 9    |  |  |  |  |  |  |  |  |  |
| 2,6  |  |  |  |  |  |  |  |  |  |
| 3,2  |  |  |  |  |  |  |  |  |  |
| 0,0  |  |  |  |  |  |  |  |  |  |
| 10,0 |  |  |  |  |  |  |  |  |  |
| 1,0  |  |  |  |  |  |  |  |  |  |
| 1,0  |  |  |  |  |  |  |  |  |  |
| 4,0  |  |  |  |  |  |  |  |  |  |
|      |  |  |  |  |  |  |  |  |  |
|      |  |  |  |  |  |  |  |  |  |
|      |  |  |  |  |  |  |  |  |  |
|      |  |  |  |  |  |  |  |  |  |
| AL   |  |  |  |  |  |  |  |  |  |

|                       |         |      |         |       |                       |       |         |      |         |
|-----------------------|---------|------|---------|-------|-----------------------|-------|---------|------|---------|
| >8 m                  |         |      |         |       |                       |       |         |      |         |
| 9                     |         |      |         |       |                       |       |         |      |         |
| -1,8                  |         |      |         |       |                       |       |         |      |         |
| 5,3                   |         |      |         |       |                       |       |         |      |         |
| -8,0                  |         |      |         |       |                       |       |         |      |         |
| 6,0                   |         |      |         |       |                       |       |         |      |         |
| -7,0                  |         |      |         |       |                       |       |         |      |         |
| 0,0                   |         |      |         |       |                       |       |         |      |         |
| 1,0                   |         |      |         |       |                       |       |         |      |         |
|                       |         |      |         |       |                       |       |         |      |         |
| GRUPO                 |         |      |         |       |                       |       |         |      |         |
| PEC                   |         |      |         |       | POT                   |       |         |      |         |
| TIEMPO APERTURA-FINAL |         |      |         |       | TIEMPO APERTURA-FINAL |       |         |      |         |
| <=8 m                 |         | >8 m |         | Total |                       | <=8 m |         | >8 m |         |
| N                     | %       | N    | %       | N     | %                     | N     | %       | N    | %       |
| 10                    | 100,0 % | 29   | 100,0 % | 40    | 100,0 %               | 31    | 100,0 % | 9    | 100,0 % |
| 0                     | 0,0 %   | 1    | 3,4 %   | 1     | 2,5 %                 | 0     | 0,0 %   | 1    | 11,1 %  |
| 3                     | 30,0 %  | 7    | 24,1 %  | 10    | 25,0 %                | 10    | 32,3 %  | 0    | 0,0 %   |
| 1                     | 10,0 %  | 1    | 3,4 %   | 5     | 12,5 %                | 4     | 12,9 %  | 1    | 11,1 %  |
| 1                     | 10,0 %  | 7    | 24,1 %  | 3     | 7,5 %                 | 3     | 9,7 %   | 0    | 0,0 %   |
| 5                     | 50,0 %  | 13   | 44,8 %  | 21    | 52,5 %                | 14    | 45,2 %  | 7    | 77,8 %  |
| 10                    | 100,0 % | 29   | 100,0 % | 40    | 100,0 %               | 31    | 100,0 % | 9    | 100,0 % |
| 0                     | 0,0 %   | 2    | 6,9 %   | 2     | 5,0 %                 | 1     | 3,2 %   | 1    | 11,1 %  |
| 7                     | 70,0 %  | 16   | 55,2 %  | 29    | 72,5 %                | 26    | 83,9 %  | 3    | 33,3 %  |
| 2                     | 20,0 %  | 3    | 10,3 %  | 2     | 5,0 %                 | 2     | 6,5 %   | 0    | 0,0 %   |
| 0                     | 0,0 %   | 4    | 13,8 %  | 3     | 7,5 %                 | 1     | 3,2 %   | 2    | 22,2 %  |
| 1                     | 10,0 %  | 4    | 13,8 %  | 4     | 10,0 %                | 1     | 3,2 %   | 3    | 33,3 %  |
|                       |         |      |         |       |                       |       |         |      |         |
|                       |         |      |         |       |                       |       |         |      |         |
|                       |         |      |         |       |                       |       |         |      |         |

|      |  |  |  |  |  |  |  |  |  |
|------|--|--|--|--|--|--|--|--|--|
|      |  |  |  |  |  |  |  |  |  |
| AL   |  |  |  |  |  |  |  |  |  |
| >8 m |  |  |  |  |  |  |  |  |  |
| 9    |  |  |  |  |  |  |  |  |  |
| 2,3  |  |  |  |  |  |  |  |  |  |
| 1,9  |  |  |  |  |  |  |  |  |  |
| 0,0  |  |  |  |  |  |  |  |  |  |
| 5,0  |  |  |  |  |  |  |  |  |  |
| 0,0  |  |  |  |  |  |  |  |  |  |
| 3,0  |  |  |  |  |  |  |  |  |  |
| 3,0  |  |  |  |  |  |  |  |  |  |
|      |  |  |  |  |  |  |  |  |  |
|      |  |  |  |  |  |  |  |  |  |
|      |  |  |  |  |  |  |  |  |  |
|      |  |  |  |  |  |  |  |  |  |
| AL   |  |  |  |  |  |  |  |  |  |
| >8 m |  |  |  |  |  |  |  |  |  |
| 9    |  |  |  |  |  |  |  |  |  |
| 2,0  |  |  |  |  |  |  |  |  |  |
| 1,7  |  |  |  |  |  |  |  |  |  |
| 0,0  |  |  |  |  |  |  |  |  |  |
| 5,0  |  |  |  |  |  |  |  |  |  |
| 1,0  |  |  |  |  |  |  |  |  |  |
| 2,0  |  |  |  |  |  |  |  |  |  |
| 3,0  |  |  |  |  |  |  |  |  |  |
|      |  |  |  |  |  |  |  |  |  |
|      |  |  |  |  |  |  |  |  |  |
|      |  |  |  |  |  |  |  |  |  |
| AL   |  |  |  |  |  |  |  |  |  |
| >8 m |  |  |  |  |  |  |  |  |  |



|      |  |  |  |  |  |  |  |  |  |
|------|--|--|--|--|--|--|--|--|--|
| 9    |  |  |  |  |  |  |  |  |  |
| 8,4  |  |  |  |  |  |  |  |  |  |
| 2,3  |  |  |  |  |  |  |  |  |  |
| 3,0  |  |  |  |  |  |  |  |  |  |
| 10,0 |  |  |  |  |  |  |  |  |  |
| 8,0  |  |  |  |  |  |  |  |  |  |
| 9,0  |  |  |  |  |  |  |  |  |  |
| 10,0 |  |  |  |  |  |  |  |  |  |
|      |  |  |  |  |  |  |  |  |  |
|      |  |  |  |  |  |  |  |  |  |
|      |  |  |  |  |  |  |  |  |  |
|      |  |  |  |  |  |  |  |  |  |
|      |  |  |  |  |  |  |  |  |  |
| Si   |  |  |  |  |  |  |  |  |  |
| 13   |  |  |  |  |  |  |  |  |  |
| 4,9  |  |  |  |  |  |  |  |  |  |
| 3,4  |  |  |  |  |  |  |  |  |  |
| 0,0  |  |  |  |  |  |  |  |  |  |
| 10,0 |  |  |  |  |  |  |  |  |  |
| 2,0  |  |  |  |  |  |  |  |  |  |
| 5,0  |  |  |  |  |  |  |  |  |  |
| 8,0  |  |  |  |  |  |  |  |  |  |
| 13   |  |  |  |  |  |  |  |  |  |
| 2,6  |  |  |  |  |  |  |  |  |  |
| 2,9  |  |  |  |  |  |  |  |  |  |
| 0,0  |  |  |  |  |  |  |  |  |  |
| 9,0  |  |  |  |  |  |  |  |  |  |
| 1,0  |  |  |  |  |  |  |  |  |  |
| 1,0  |  |  |  |  |  |  |  |  |  |
| 4,0  |  |  |  |  |  |  |  |  |  |
| 13   |  |  |  |  |  |  |  |  |  |
| 1,7  |  |  |  |  |  |  |  |  |  |

|       |  |  |  |  |  |  |  |  |  |
|-------|--|--|--|--|--|--|--|--|--|
| 2,4   |  |  |  |  |  |  |  |  |  |
| 0,0   |  |  |  |  |  |  |  |  |  |
| 7,0   |  |  |  |  |  |  |  |  |  |
| 0,0   |  |  |  |  |  |  |  |  |  |
| 1,0   |  |  |  |  |  |  |  |  |  |
| 2,0   |  |  |  |  |  |  |  |  |  |
| 13    |  |  |  |  |  |  |  |  |  |
| 1,6   |  |  |  |  |  |  |  |  |  |
| 2,8   |  |  |  |  |  |  |  |  |  |
| 0,0   |  |  |  |  |  |  |  |  |  |
| 10,0  |  |  |  |  |  |  |  |  |  |
| 0,0   |  |  |  |  |  |  |  |  |  |
| 1,0   |  |  |  |  |  |  |  |  |  |
| 1,0   |  |  |  |  |  |  |  |  |  |
|       |  |  |  |  |  |  |  |  |  |
|       |  |  |  |  |  |  |  |  |  |
|       |  |  |  |  |  |  |  |  |  |
|       |  |  |  |  |  |  |  |  |  |
| Si    |  |  |  |  |  |  |  |  |  |
| 13    |  |  |  |  |  |  |  |  |  |
| -3,3  |  |  |  |  |  |  |  |  |  |
| 5,0   |  |  |  |  |  |  |  |  |  |
| -9,0  |  |  |  |  |  |  |  |  |  |
| 6,0   |  |  |  |  |  |  |  |  |  |
| -8,0  |  |  |  |  |  |  |  |  |  |
| -5,0  |  |  |  |  |  |  |  |  |  |
| 0,0   |  |  |  |  |  |  |  |  |  |
|       |  |  |  |  |  |  |  |  |  |
| GRUPO |  |  |  |  |  |  |  |  |  |

| PEC              |         |    |         | POT              |         |    |         |    |         |
|------------------|---------|----|---------|------------------|---------|----|---------|----|---------|
| SANGRADO PROFUSO |         |    |         | SANGRADO PROFUSO |         |    |         |    |         |
| No               |         | Si |         | Total            |         | No |         | Si |         |
| N                | %       | N  | %       | N                | %       | N  | %       | N  | %       |
| 24               | 100,0 % | 16 | 100,0 % | 40               | 100,0 % | 27 | 100,0 % | 13 | 100,0 % |
| 0                | 0,0 %   | 1  | 6,3 %   | 1                | 2,5 %   | 1  | 3,7 %   | 0  | 0,0 %   |
| 4                | 16,7 %  | 6  | 37,5 %  | 10               | 25,0 %  | 7  | 25,9 %  | 3  | 23,1 %  |
| 1                | 4,2 %   | 1  | 6,3 %   | 5                | 12,5 %  | 5  | 18,5 %  | 0  | 0,0 %   |
| 8                | 33,3 %  | 1  | 6,3 %   | 3                | 7,5 %   | 1  | 3,7 %   | 2  | 15,4 %  |
| 11               | 45,8 %  | 7  | 43,8 %  | 21               | 52,5 %  | 13 | 48,1 %  | 8  | 61,5 %  |
| 24               | 100,0 % | 16 | 100,0 % | 40               | 100,0 % | 27 | 100,0 % | 13 | 100,0 % |
| 1                | 4,2 %   | 1  | 6,3 %   | 2                | 5,0 %   | 2  | 7,4 %   | 0  | 0,0 %   |
| 14               | 58,3 %  | 10 | 62,5 %  | 29               | 72,5 %  | 21 | 77,8 %  | 8  | 61,5 %  |
| 2                | 8,3 %   | 3  | 18,8 %  | 2                | 5,0 %   | 0  | 0,0 %   | 2  | 15,4 %  |
| 2                | 8,3 %   | 2  | 12,5 %  | 3                | 7,5 %   | 2  | 7,4 %   | 1  | 7,7 %   |
| 5                | 20,8 %  | 0  | 0,0 %   | 4                | 10,0 %  | 2  | 7,4 %   | 2  | 15,4 %  |
|                  |         |    |         |                  |         |    |         |    |         |
|                  |         |    |         |                  |         |    |         |    |         |
|                  |         |    |         |                  |         |    |         |    |         |
|                  |         |    |         |                  |         |    |         |    |         |
| Si               |         |    |         |                  |         |    |         |    |         |
| 13               |         |    |         |                  |         |    |         |    |         |
| 9,5              |         |    |         |                  |         |    |         |    |         |
| 1,1              |         |    |         |                  |         |    |         |    |         |
| 7,0              |         |    |         |                  |         |    |         |    |         |
| 10,0             |         |    |         |                  |         |    |         |    |         |
| 10,0             |         |    |         |                  |         |    |         |    |         |
| 10,0             |         |    |         |                  |         |    |         |    |         |
| 10,0             |         |    |         |                  |         |    |         |    |         |
|                  |         |    |         |                  |         |    |         |    |         |

| GRUPO   |        |         |            |         |       |         |       |         |     |
|---------|--------|---------|------------|---------|-------|---------|-------|---------|-----|
| PEC     |        |         |            |         |       |         |       |         |     |
| CAUSA   |        |         |            |         |       |         |       |         |     |
| tal     | Caries |         | Obturación |         | Resto |         | Total |         | Car |
| %       | N      | %       | N          | %       | N     | %       | N     | %       | N   |
| 100,0 % | 19     | 100,0 % | 13         | 100,0 % | 8     | 100,0 % | 40    | 100,0 % | 21  |
| 60,0 %  | 12     | 63,2 %  | 8          | 61,5 %  | 4     | 50,0 %  | 27    | 67,5 %  | 15  |
| 40,0 %  | 7      | 36,8 %  | 5          | 38,5 %  | 4     | 50,0 %  | 13    | 32,5 %  | 6   |
|         |        |         |            |         |       |         |       |         |     |

| GRUPO   |        |         |            |         |       |         |       |         |     |
|---------|--------|---------|------------|---------|-------|---------|-------|---------|-----|
| PEC     |        |         |            |         |       |         |       |         |     |
| CAUSA   |        |         |            |         |       |         |       |         |     |
| tal     | Caries |         | Obturación |         | Resto |         | Total |         | Car |
| %       | N      | %       | N          | %       | N     | %       | N     | %       | N   |
| 100,0 % | 19     | 100,0 % | 13         | 100,0 % | 8     | 100,0 % | 40    | 100,0 % | 21  |
| 70,0 %  | 14     | 73,7 %  | 9          | 69,2 %  | 5     | 62,5 %  | 31    | 77,5 %  | 15  |
| 30,0 %  | 5      | 26,3 %  | 4          | 30,8 %  | 3     | 37,5 %  | 9     | 22,5 %  | 6   |
|         |        |         |            |         |       |         |       |         |     |

| GRUPO   |        |         |            |         |       |         |       |         |     |
|---------|--------|---------|------------|---------|-------|---------|-------|---------|-----|
| PEC     |        |         |            |         |       |         |       |         |     |
| CAUSA   |        |         |            |         |       |         |       |         |     |
| tal     | Caries |         | Obturación |         | Resto |         | Total |         | Car |
| %       | N      | %       | N          | %       | N     | %       | N     | %       | N   |
| 100,0 % | 19     | 100,0 % | 13         | 100,0 % | 8     | 100,0 % | 40    | 100,0 % | 21  |
| 50,0 %  | 11     | 57,9 %  | 3          | 23,1 %  | 6     | 75,0 %  | 27    | 67,5 %  | 13  |
| 50,0 %  | 8      | 42,1 %  | 10         | 76,9 %  | 2     | 25,0 %  | 13    | 32,5 %  | 8   |
|         |        |         |            |         |       |         |       |         |     |

|       |        |            |       |  |  |  |  |  |  |
|-------|--------|------------|-------|--|--|--|--|--|--|
|       |        |            |       |  |  |  |  |  |  |
|       |        |            |       |  |  |  |  |  |  |
| POT   |        |            |       |  |  |  |  |  |  |
| CAUSA |        |            |       |  |  |  |  |  |  |
| Total | Caries | Obturación | Resto |  |  |  |  |  |  |
| 40    | 21     | 10         | 9     |  |  |  |  |  |  |
| 5,6   | 5,1    | 5,5        | 7,0   |  |  |  |  |  |  |
| 3,1   | 3,1    | 2,9        | 3,1   |  |  |  |  |  |  |
| 0,0   | 0,0    | 0,0        | 0,0   |  |  |  |  |  |  |
| 10,0  | 9,0    | 9,0        | 10,0  |  |  |  |  |  |  |
| 4,0   | 3,0    | 4,0        | 6,0   |  |  |  |  |  |  |
| 6,0   | 5,0    | 6,5        | 8,0   |  |  |  |  |  |  |
| 8,0   | 8,0    | 8,0        | 9,0   |  |  |  |  |  |  |
| 40    | 21     | 10         | 9     |  |  |  |  |  |  |
| 2,0   | 2,3    | 1,6        | 1,9   |  |  |  |  |  |  |
| 2,3   | 2,1    | 2,2        | 2,9   |  |  |  |  |  |  |
| 0,0   | 0,0    | 0,0        | 0,0   |  |  |  |  |  |  |
| 9,0   | 7,0    | 7,0        | 9,0   |  |  |  |  |  |  |
| 0,0   | 0,0    | 0,0        | 0,0   |  |  |  |  |  |  |
| 1,0   | 2,0    | 1,0        | 1,0   |  |  |  |  |  |  |
| 3,0   | 3,0    | 2,0        | 3,0   |  |  |  |  |  |  |
| 40    | 21     | 10         | 9     |  |  |  |  |  |  |
| 1,3   | 1,3    | 0,9        | 1,4   |  |  |  |  |  |  |
| 2,0   | 1,8    | 1,7        | 2,7   |  |  |  |  |  |  |
| 0,0   | 0,0    | 0,0        | 0,0   |  |  |  |  |  |  |
| 7,0   | 5,0    | 5,0        | 7,0   |  |  |  |  |  |  |
| 0,0   | 0,0    | 0,0        | 0,0   |  |  |  |  |  |  |
| 0,0   | 1,0    | 0,0        | 0,0   |  |  |  |  |  |  |
| 1,5   | 2,0    | 1,0        | 1,0   |  |  |  |  |  |  |
| 40    | 21     | 10         | 9     |  |  |  |  |  |  |
| 1,3   | 1,0    | 2,4        | 0,8   |  |  |  |  |  |  |
| 2,0   | 1,3    | 3,0        | 1,6   |  |  |  |  |  |  |



|    |         |    |         |    |         |   |         |    |         |
|----|---------|----|---------|----|---------|---|---------|----|---------|
| 40 | 100,0 % | 19 | 100,0 % | 13 | 100,0 % | 8 | 100,0 % | 40 | 100,0 % |
| 2  | 5,0 %   | 2  | 10,5 %  | 0  | 0,0 %   | 0 | 0,0 %   | 2  | 5,0 %   |
| 24 | 60,0 %  | 14 | 73,7 %  | 5  | 38,5 %  | 5 | 62,5 %  | 29 | 72,5 %  |
| 5  | 12,5 %  | 0  | 0,0 %   | 4  | 30,8 %  | 1 | 12,5 %  | 2  | 5,0 %   |
| 4  | 10,0 %  | 3  | 15,8 %  | 1  | 7,7 %   | 0 | 0,0 %   | 3  | 7,5 %   |
| 5  | 12,5 %  | 0  | 0,0 %   | 3  | 23,1 %  | 2 | 25,0 %  | 4  | 10,0 %  |

|      |  |  |  |  |  |  |  |  |  |
|------|--|--|--|--|--|--|--|--|--|
|      |  |  |  |  |  |  |  |  |  |
|      |  |  |  |  |  |  |  |  |  |
|      |  |  |  |  |  |  |  |  |  |
|      |  |  |  |  |  |  |  |  |  |
| ARIA |  |  |  |  |  |  |  |  |  |
| Si   |  |  |  |  |  |  |  |  |  |
| 24   |  |  |  |  |  |  |  |  |  |
| 5,8  |  |  |  |  |  |  |  |  |  |
| 3,1  |  |  |  |  |  |  |  |  |  |
| 0,0  |  |  |  |  |  |  |  |  |  |
| 10,0 |  |  |  |  |  |  |  |  |  |
| 4,0  |  |  |  |  |  |  |  |  |  |
| 7,0  |  |  |  |  |  |  |  |  |  |
| 8,0  |  |  |  |  |  |  |  |  |  |
| 24   |  |  |  |  |  |  |  |  |  |
| 1,9  |  |  |  |  |  |  |  |  |  |
| 1,7  |  |  |  |  |  |  |  |  |  |
| 0,0  |  |  |  |  |  |  |  |  |  |
| 7,0  |  |  |  |  |  |  |  |  |  |
| 0,5  |  |  |  |  |  |  |  |  |  |
| 2,0  |  |  |  |  |  |  |  |  |  |
| 3,0  |  |  |  |  |  |  |  |  |  |
| 24   |  |  |  |  |  |  |  |  |  |
| 1,3  |  |  |  |  |  |  |  |  |  |
| 1,9  |  |  |  |  |  |  |  |  |  |
| 0,0  |  |  |  |  |  |  |  |  |  |
| 5,0  |  |  |  |  |  |  |  |  |  |

|                          |  |    |  |                          |  |    |  |    |  |
|--------------------------|--|----|--|--------------------------|--|----|--|----|--|
| 0,0                      |  |    |  |                          |  |    |  |    |  |
| 0,0                      |  |    |  |                          |  |    |  |    |  |
| 1,5                      |  |    |  |                          |  |    |  |    |  |
| 24                       |  |    |  |                          |  |    |  |    |  |
| 1,4                      |  |    |  |                          |  |    |  |    |  |
| 1,6                      |  |    |  |                          |  |    |  |    |  |
| 0,0                      |  |    |  |                          |  |    |  |    |  |
| 5,0                      |  |    |  |                          |  |    |  |    |  |
| 0,0                      |  |    |  |                          |  |    |  |    |  |
| 1,0                      |  |    |  |                          |  |    |  |    |  |
| 3,0                      |  |    |  |                          |  |    |  |    |  |
|                          |  |    |  |                          |  |    |  |    |  |
|                          |  |    |  |                          |  |    |  |    |  |
|                          |  |    |  |                          |  |    |  |    |  |
|                          |  |    |  |                          |  |    |  |    |  |
| ARIA                     |  |    |  |                          |  |    |  |    |  |
| Sí                       |  |    |  |                          |  |    |  |    |  |
| 24                       |  |    |  |                          |  |    |  |    |  |
| -4,4                     |  |    |  |                          |  |    |  |    |  |
| 3,5                      |  |    |  |                          |  |    |  |    |  |
| -9,0                     |  |    |  |                          |  |    |  |    |  |
| 4,0                      |  |    |  |                          |  |    |  |    |  |
| -7,0                     |  |    |  |                          |  |    |  |    |  |
| -5,0                     |  |    |  |                          |  |    |  |    |  |
| -1,0                     |  |    |  |                          |  |    |  |    |  |
|                          |  |    |  |                          |  |    |  |    |  |
|                          |  |    |  |                          |  |    |  |    |  |
| GRUPO                    |  |    |  |                          |  |    |  |    |  |
| PEC                      |  |    |  | POT                      |  |    |  |    |  |
| ANESTESIA COMPLEMENTARIA |  |    |  | ANESTESIA COMPLEMENTARIA |  |    |  |    |  |
| No                       |  | Sí |  | Total                    |  | No |  | Sí |  |



| N  | %       | N  | %       | N  | %       | N  | %       | N  | %       |
|----|---------|----|---------|----|---------|----|---------|----|---------|
| 16 | 100,0 % | 24 | 100,0 % | 40 | 100,0 % | 16 | 100,0 % | 24 | 100,0 % |
| 1  | 6,3 %   | 0  | 0,0 %   | 1  | 2,5 %   | 0  | 0,0 %   | 1  | 4,2 %   |
| 3  | 18,8 %  | 7  | 29,2 %  | 10 | 25,0 %  | 7  | 43,8 %  | 3  | 12,5 %  |
| 1  | 6,3 %   | 1  | 4,2 %   | 5  | 12,5 %  | 1  | 6,3 %   | 4  | 16,7 %  |
| 3  | 18,8 %  | 6  | 25,0 %  | 3  | 7,5 %   | 1  | 6,3 %   | 2  | 8,3 %   |
| 8  | 50,0 %  | 10 | 41,7 %  | 21 | 52,5 %  | 7  | 43,8 %  | 14 | 58,3 %  |
| 16 | 100,0 % | 24 | 100,0 % | 40 | 100,0 % | 16 | 100,0 % | 24 | 100,0 % |
| 1  | 6,3 %   | 1  | 4,2 %   | 2  | 5,0 %   | 0  | 0,0 %   | 2  | 8,3 %   |
| 10 | 62,5 %  | 14 | 58,3 %  | 29 | 72,5 %  | 11 | 68,8 %  | 18 | 75,0 %  |
| 3  | 18,8 %  | 2  | 8,3 %   | 2  | 5,0 %   | 2  | 12,5 %  | 0  | 0,0 %   |
| 1  | 6,3 %   | 3  | 12,5 %  | 3  | 7,5 %   | 2  | 12,5 %  | 1  | 4,2 %   |
| 1  | 6,3 %   | 4  | 16,7 %  | 4  | 10,0 %  | 1  | 6,3 %   | 3  | 12,5 %  |

|      |  |  |  |  |  |  |  |  |  |
|------|--|--|--|--|--|--|--|--|--|
|      |  |  |  |  |  |  |  |  |  |
|      |  |  |  |  |  |  |  |  |  |
|      |  |  |  |  |  |  |  |  |  |
|      |  |  |  |  |  |  |  |  |  |
| ARIA |  |  |  |  |  |  |  |  |  |
| Si   |  |  |  |  |  |  |  |  |  |
| 24   |  |  |  |  |  |  |  |  |  |
| 8,7  |  |  |  |  |  |  |  |  |  |
| 2,4  |  |  |  |  |  |  |  |  |  |
| 1,0  |  |  |  |  |  |  |  |  |  |
| 10,0 |  |  |  |  |  |  |  |  |  |
| 8,0  |  |  |  |  |  |  |  |  |  |
| 10,0 |  |  |  |  |  |  |  |  |  |
| 10,0 |  |  |  |  |  |  |  |  |  |
|      |  |  |  |  |  |  |  |  |  |

| GRUPO |  |  |  |  |     |  |  |  |  |
|-------|--|--|--|--|-----|--|--|--|--|
| PEC   |  |  |  |  | POT |  |  |  |  |

| INTRALIGAMENTOSA |         |    |         | INTRALIGAMENTOSA |         |    |         |    |         |
|------------------|---------|----|---------|------------------|---------|----|---------|----|---------|
| No               |         | Sí |         | Total            |         | No |         | Sí |         |
| N                | %       | N  | %       | N                | %       | N  | %       | N  | %       |
| 23               | 100,0 % | 17 | 100,0 % | 40               | 100,0 % | 20 | 100,0 % | 20 | 100,0 % |
| 23               | 100,0 % | 15 | 88,2 %  | 38               | 95,0 %  | 20 | 100,0 % | 18 | 90,0 %  |
| 0                | 0,0 %   | 2  | 11,8 %  | 2                | 5,0 %   | 0  | 0,0 %   | 2  | 10,0 %  |
|                  |         |    |         |                  |         |    |         |    |         |
|                  |         |    |         |                  |         |    |         |    |         |
|                  |         |    |         |                  |         |    |         |    |         |
|                  |         |    |         |                  |         |    |         |    |         |
|                  |         |    |         |                  |         |    |         |    |         |
| Sí               |         |    |         |                  |         |    |         |    |         |
| 14               |         |    |         |                  |         |    |         |    |         |
| 2,1              |         |    |         |                  |         |    |         |    |         |
| 2,1              |         |    |         |                  |         |    |         |    |         |
| 0,0              |         |    |         |                  |         |    |         |    |         |
| 5,0              |         |    |         |                  |         |    |         |    |         |
| 0,0              |         |    |         |                  |         |    |         |    |         |
| 2,5              |         |    |         |                  |         |    |         |    |         |
| 3,0              |         |    |         |                  |         |    |         |    |         |

























































[illegible]



















|         |            |         |       |         |  |
|---------|------------|---------|-------|---------|--|
|         |            |         |       |         |  |
|         |            |         |       |         |  |
| POT     |            |         |       |         |  |
| CAUSA   |            |         |       |         |  |
| ries    | Obturación |         | Resto |         |  |
| %       | N          | %       | N     | %       |  |
| 100,0 % | 10         | 100,0 % | 9     | 100,0 % |  |
| 71,4 %  | 8          | 80,0 %  | 4     | 44,4 %  |  |
| 28,6 %  | 2          | 20,0 %  | 5     | 55,6 %  |  |
|         |            |         |       |         |  |
|         |            |         |       |         |  |
|         |            |         |       |         |  |
| POT     |            |         |       |         |  |
| CAUSA   |            |         |       |         |  |
| ries    | Obturación |         | Resto |         |  |
| %       | N          | %       | N     | %       |  |
| 100,0 % | 10         | 100,0 % | 9     | 100,0 % |  |
| 71,4 %  | 9          | 90,0 %  | 7     | 77,8 %  |  |
| 28,6 %  | 1          | 10,0 %  | 2     | 22,2 %  |  |
|         |            |         |       |         |  |
|         |            |         |       |         |  |
|         |            |         |       |         |  |
| POT     |            |         |       |         |  |
| CAUSA   |            |         |       |         |  |
| ries    | Obturación |         | Resto |         |  |
| %       | N          | %       | N     | %       |  |
| 100,0 % | 10         | 100,0 % | 9     | 100,0 % |  |
| 61,9 %  | 8          | 80,0 %  | 6     | 66,7 %  |  |
| 38,1 %  | 2          | 20,0 %  | 3     | 33,3 %  |  |
|         |            |         |       |         |  |









[illegible]
